# Supplementary material for: Mild base-promoted benzannulation for the construction of polyfunctionalized m-terphenyl derivatives and their application as potent UV-filters
Source: Royal Society of Chemistry journal article supplement (doi:10.1039/c6ra15193k), 2016-01-01
Supplement: c6ra15193k1.pdf [file c6ra15193k1.pdf]

## SUPPORTING INFORMATION

### **Mild base-promoted benzannulation for the construction of polyfunctionalized *m*-terphenyl derivatives and their application as potent UV-filters**

Ramuel John Inductivo Tamargo, Tej Narayan Poudel and Yong Rok Lee\*

*School of Chemical Engineering, Yeungnam University, Gyeongsan 712-749, Republic of Korea*

*Email: yrlee@yu.ac.kr, Phone: +82-53-810-2529; Fax: +82-53-810-4631*

#### **Table of Contents**

|                                                                                |           |
|--------------------------------------------------------------------------------|-----------|
| <b><sup>1</sup>H NMR and <sup>13</sup>C NMR spectra of compounds 3-6 and 8</b> | <b>2</b>  |
| <b>Procedure for the spectrophotometric measurements</b>                       | <b>35</b> |
| <b>UV Absorption spectra of compounds 3a, 5-6</b>                              | <b>35</b> |
| <b>X-Ray crystallographic structure and data of compound 3c</b>                | <b>36</b> |

# <sup>1</sup>H NMR and <sup>13</sup>C NMR Spectra of compounds 3-6

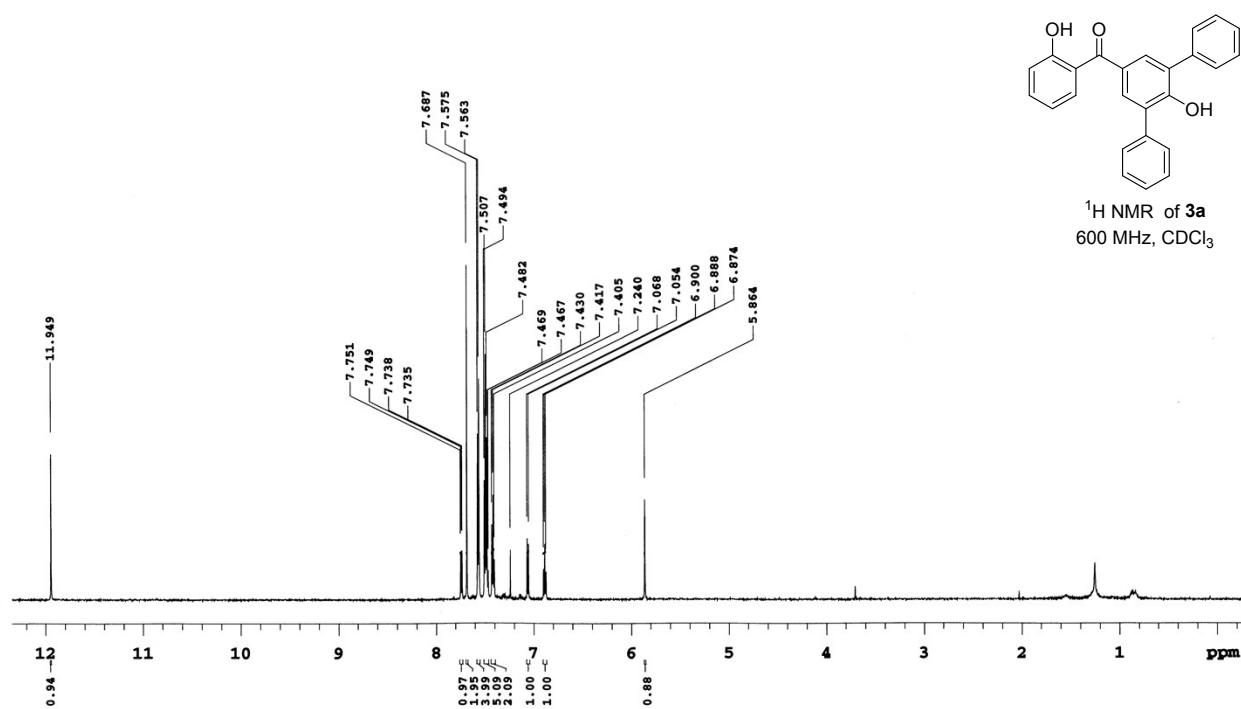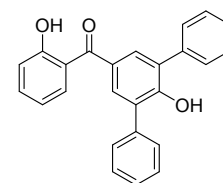

<sup>1</sup>H NMR of 3a  
600 MHz, CDCl<sub>3</sub>

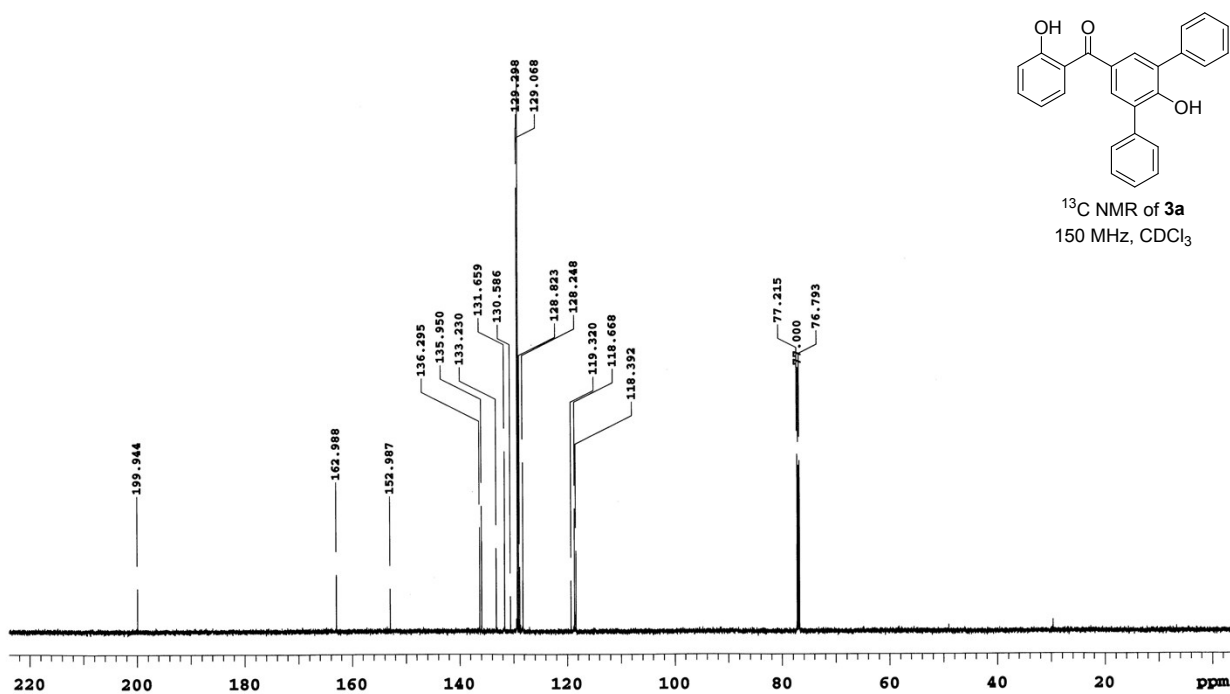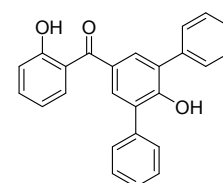

<sup>13</sup>C NMR of 3a  
150 MHz, CDCl<sub>3</sub>

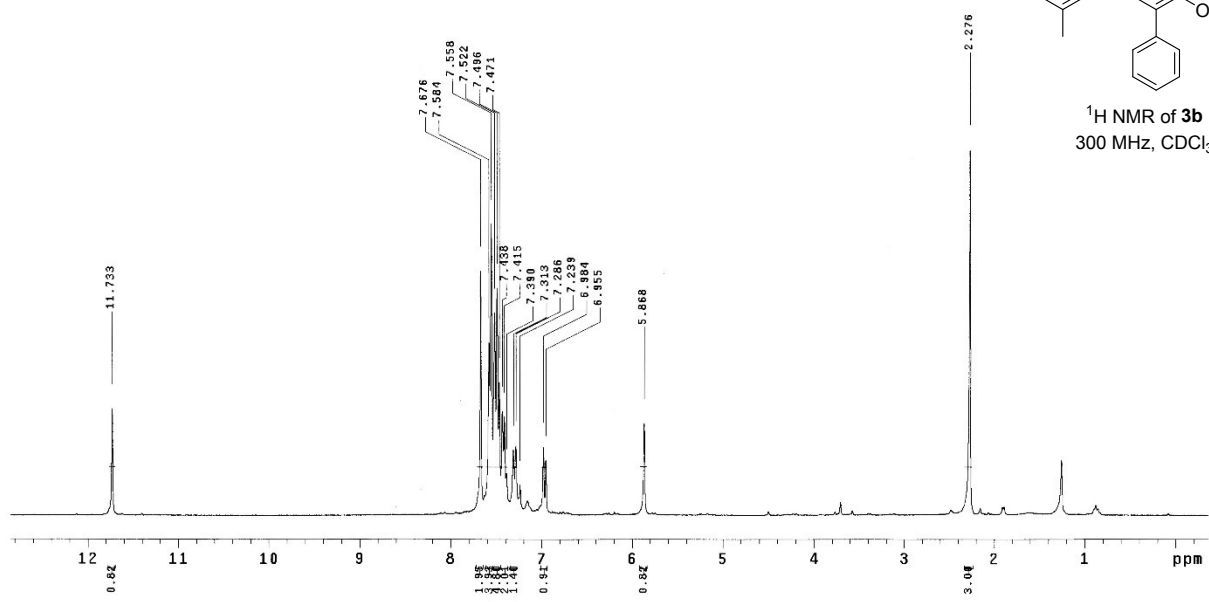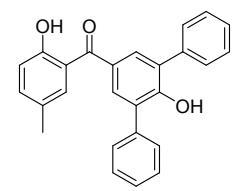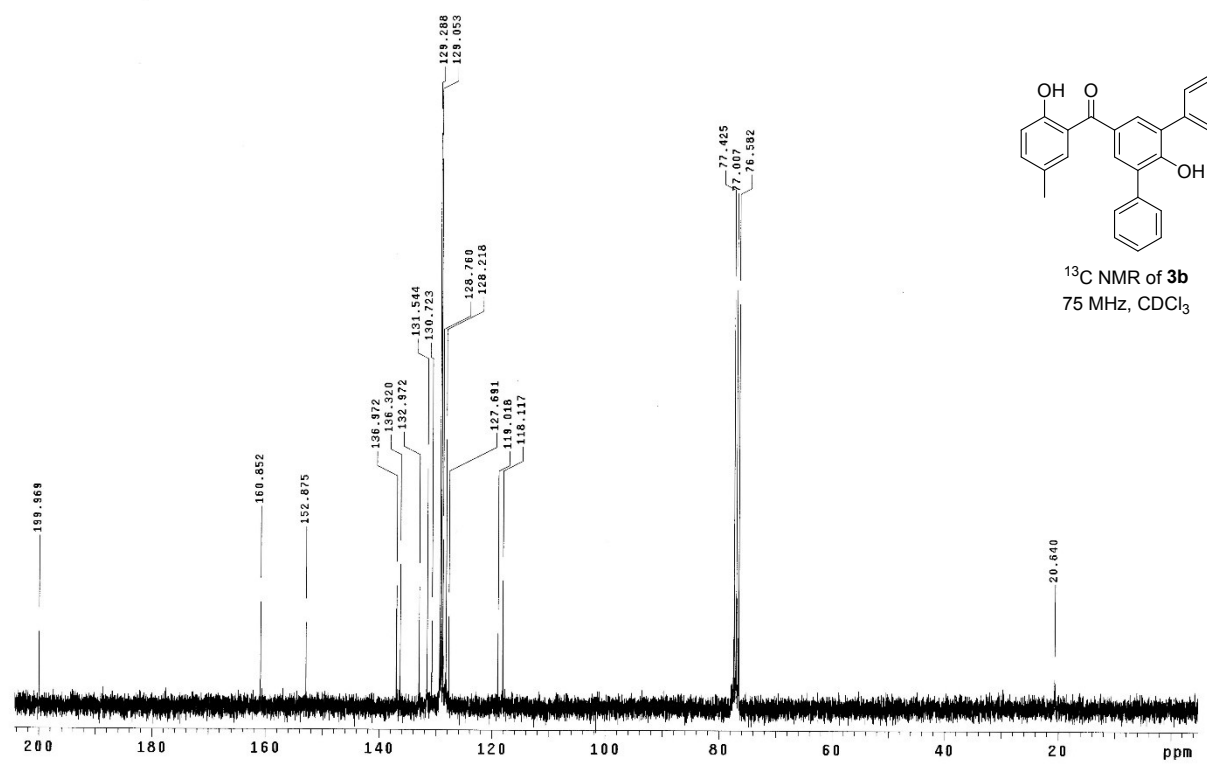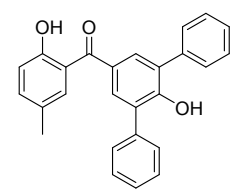

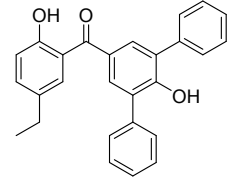

<sup>1</sup>H NMR of **3c**  
600 MHz, CDCl<sub>3</sub>

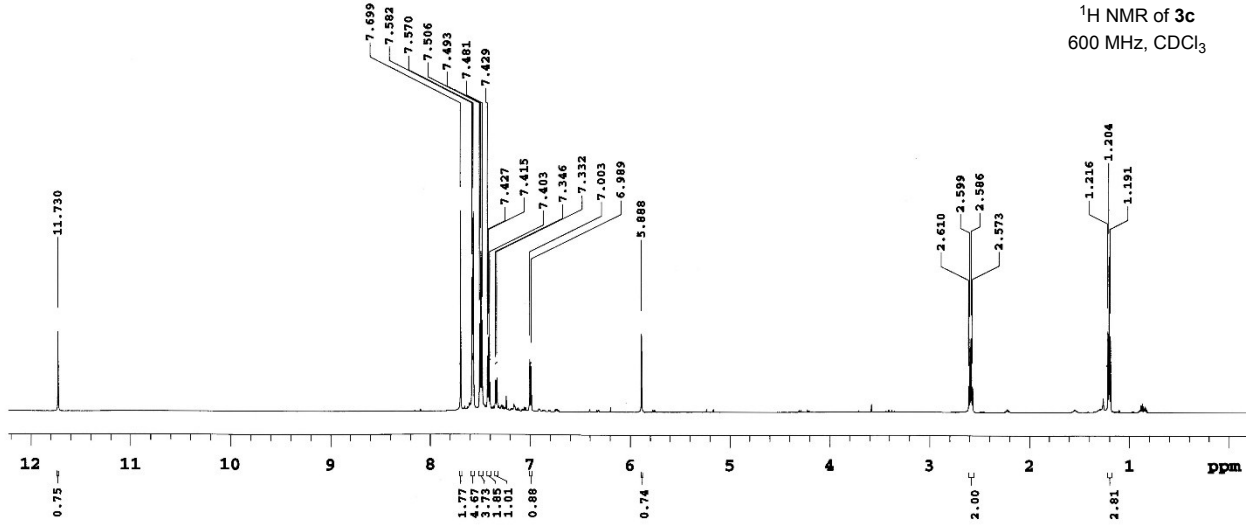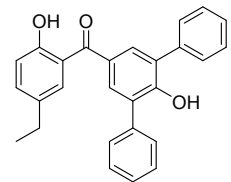

<sup>13</sup>C NMR of **3c**  
150 MHz, CDCl<sub>3</sub>

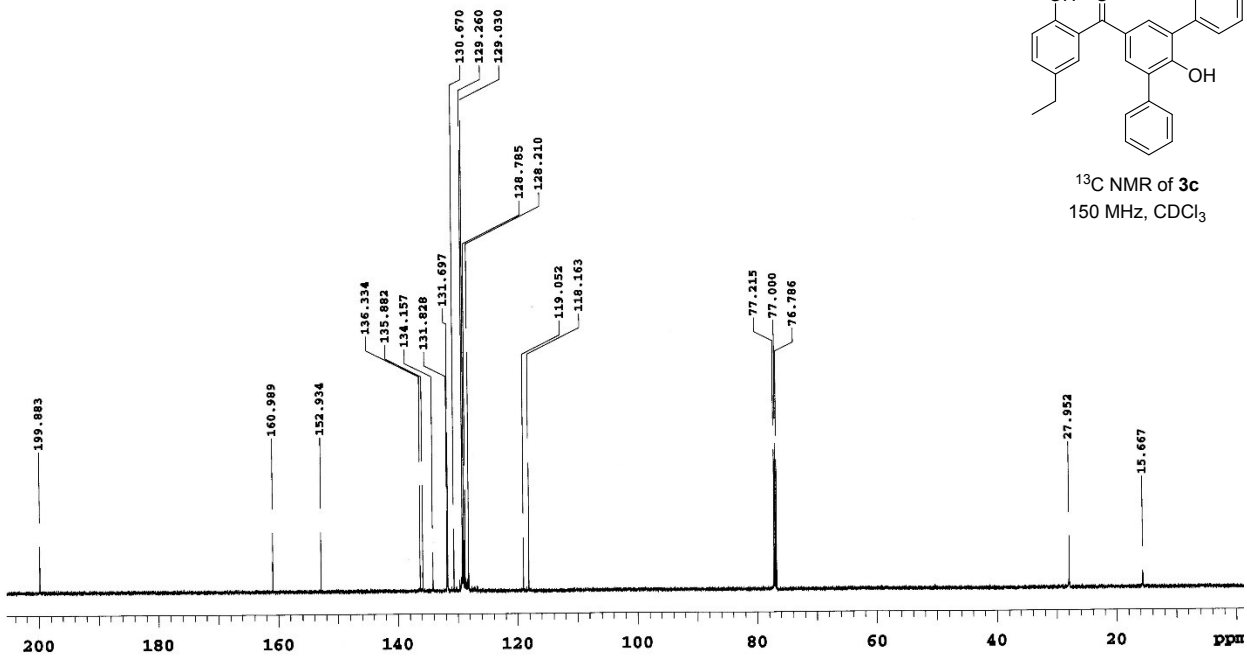

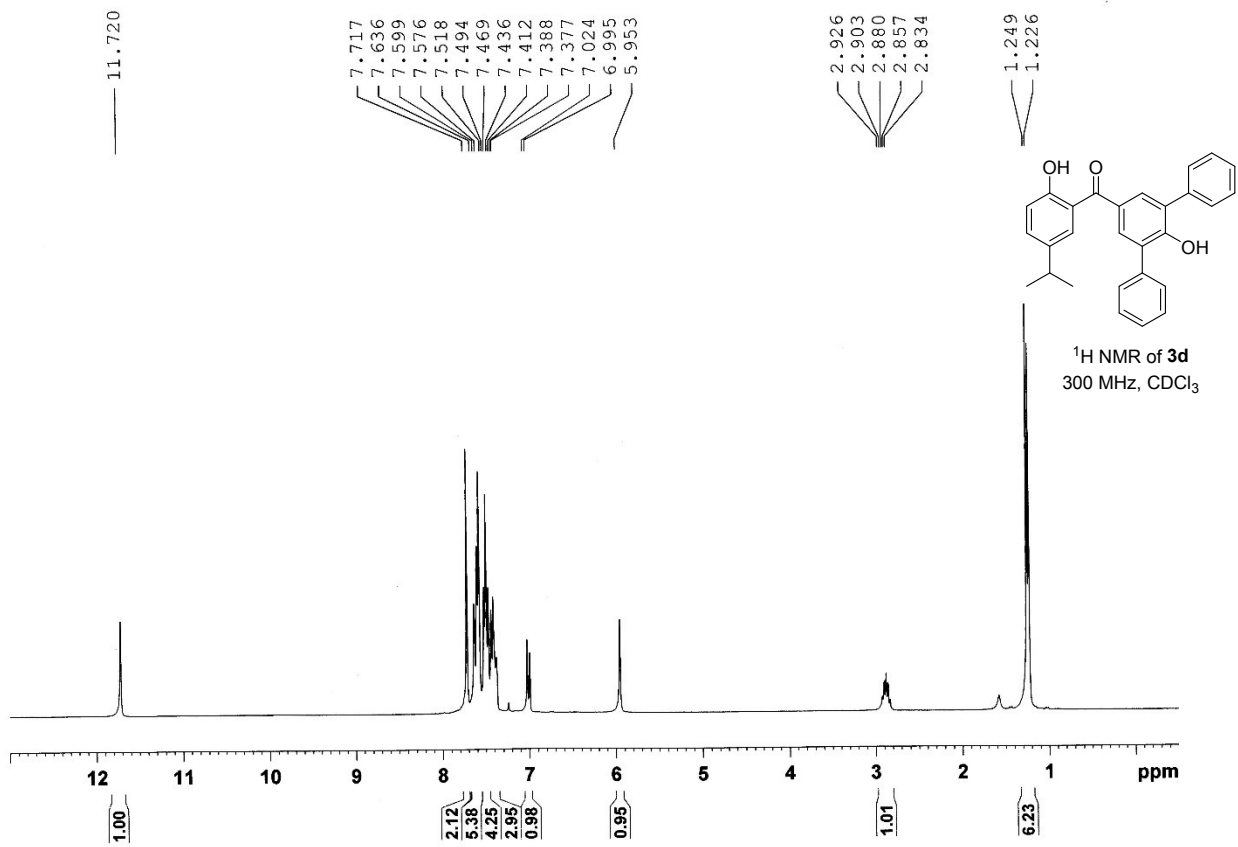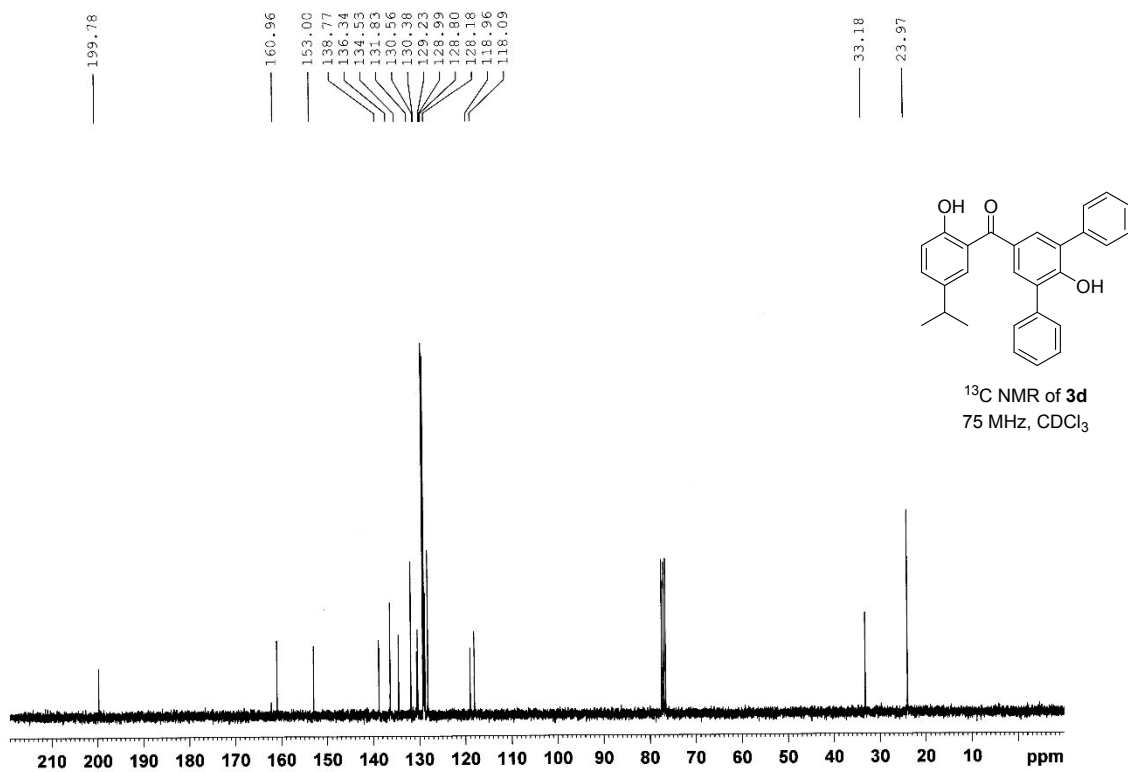

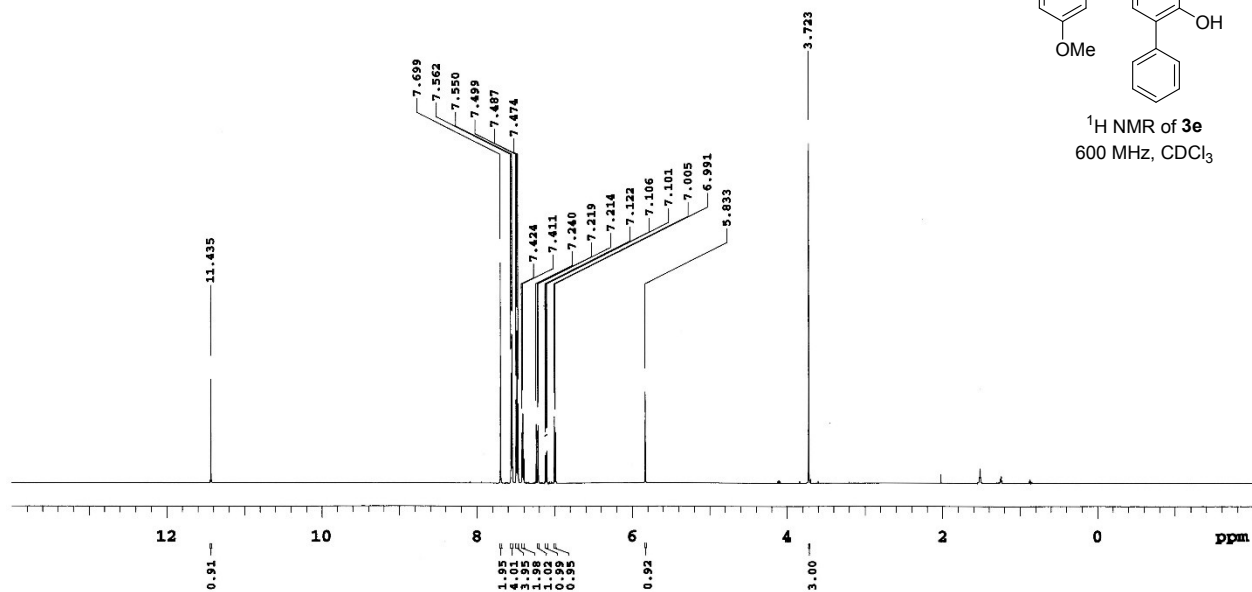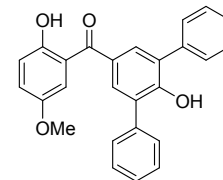

**<sup>1</sup>H NMR of 3e**  
600 MHz, CDCl<sub>3</sub>

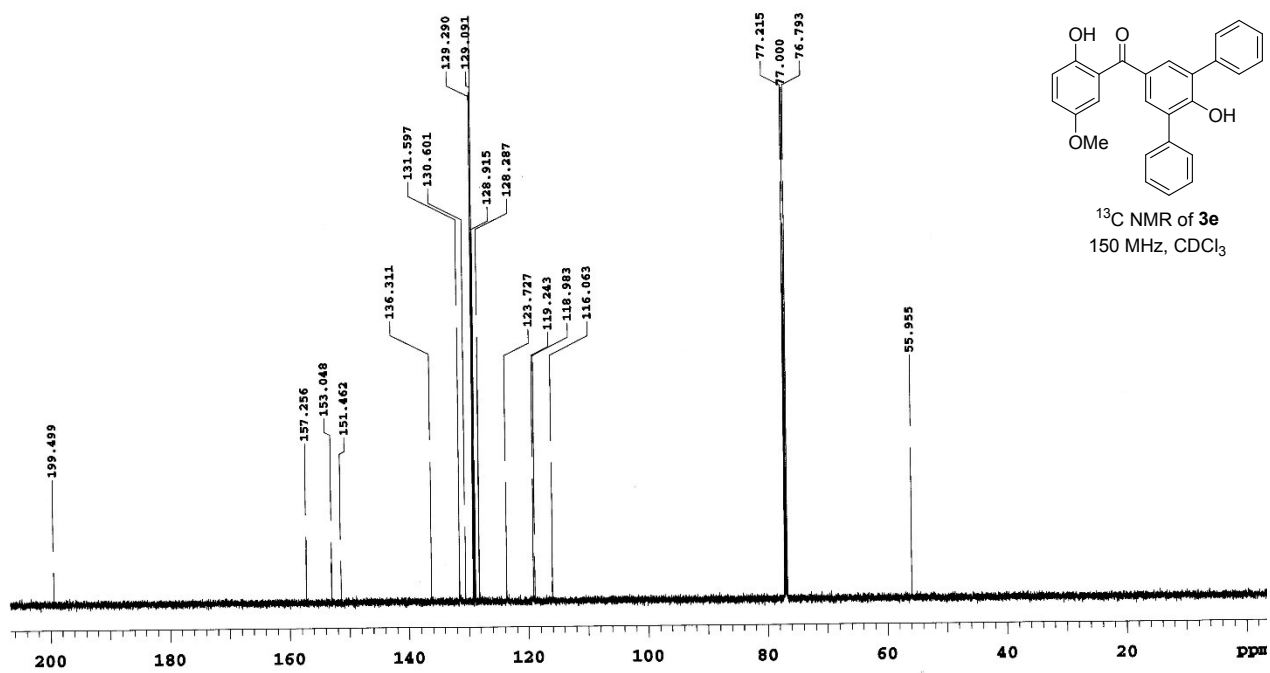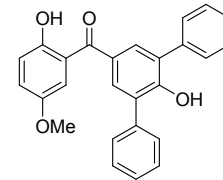

**<sup>13</sup>C NMR of 3e**  
150 MHz, CDCl<sub>3</sub>

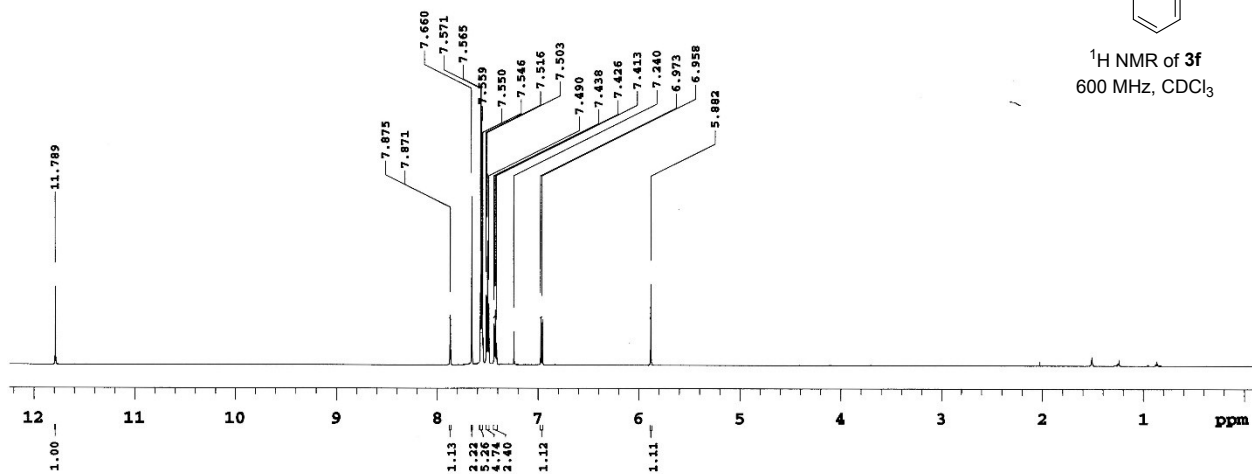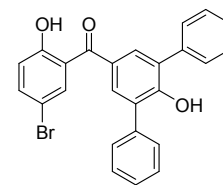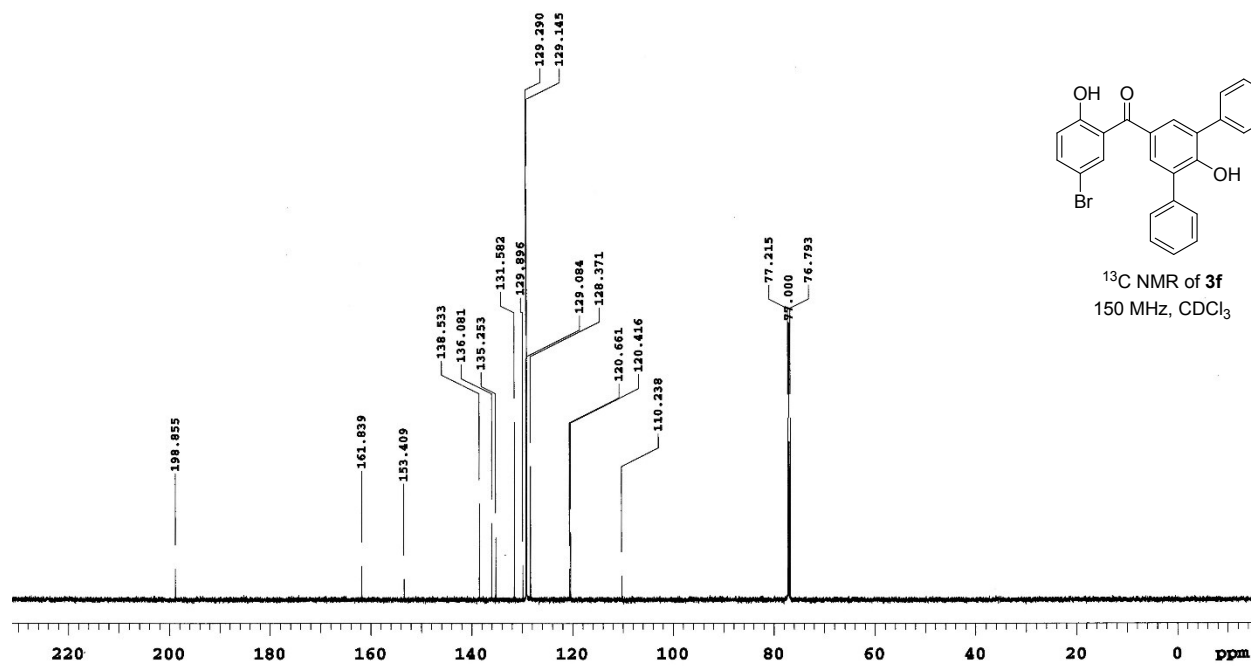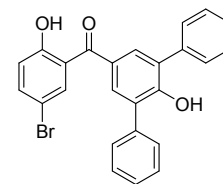

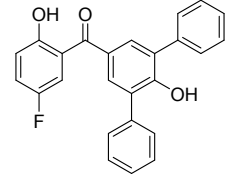

<sup>1</sup>H NMR of **3g**  
600 MHz, CDCl<sub>3</sub>

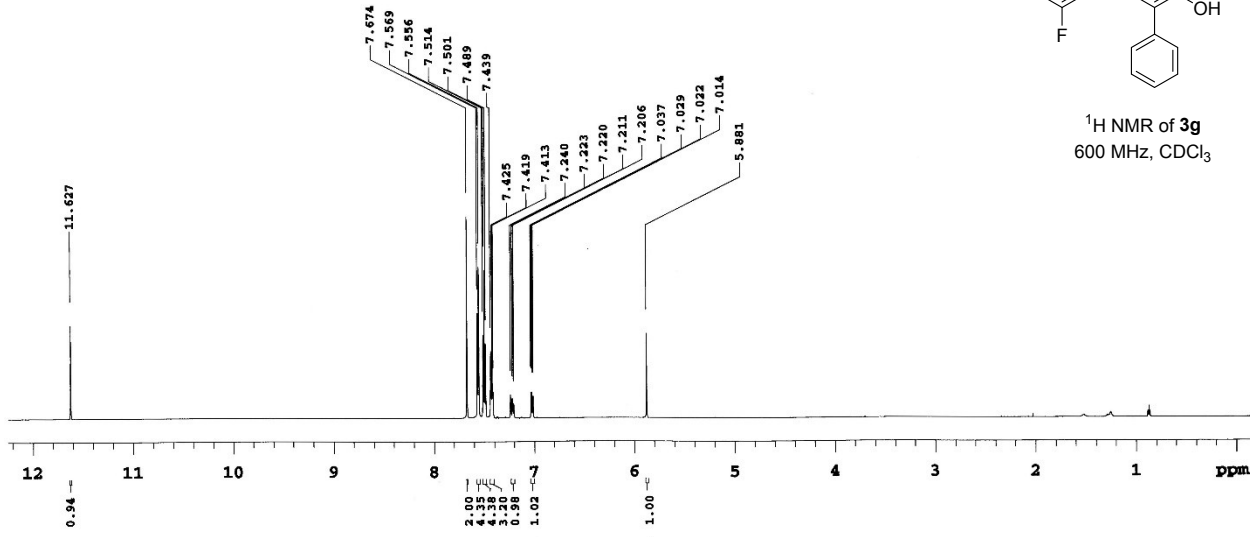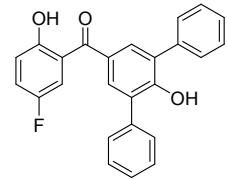

<sup>13</sup>C NMR of **3g**  
150 MHz, CDCl<sub>3</sub>

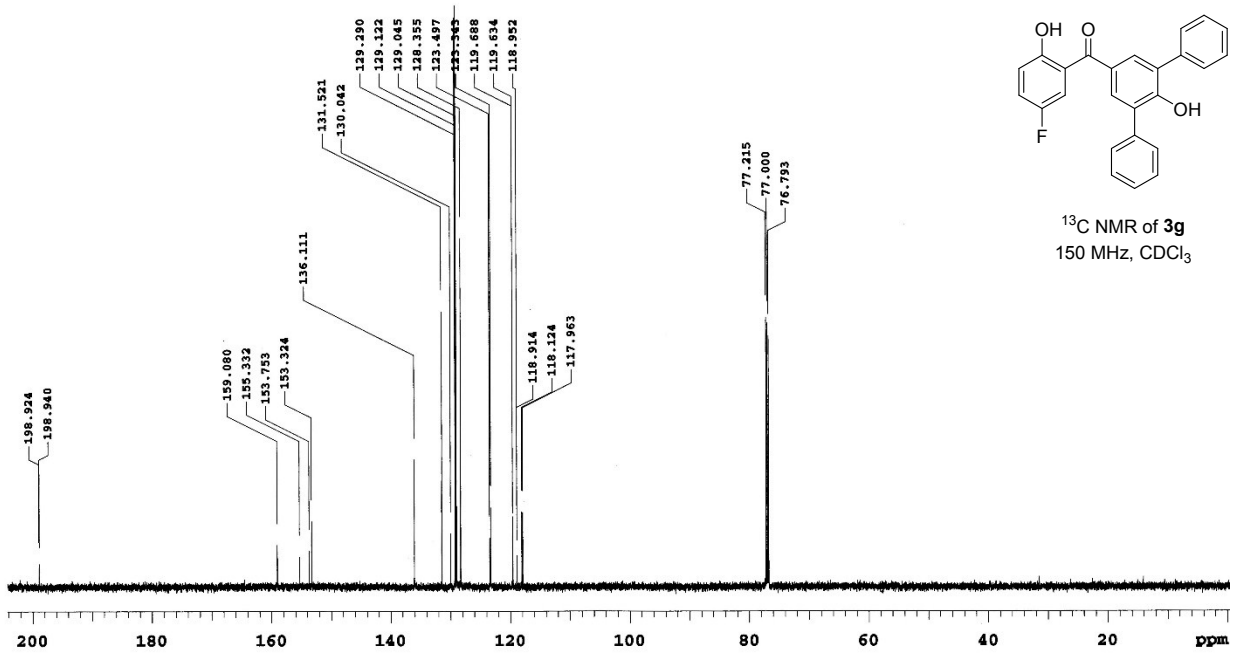



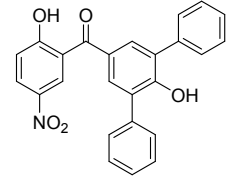

<sup>1</sup>H NMR of **3h**  
600 MHz, CDCl<sub>3</sub>

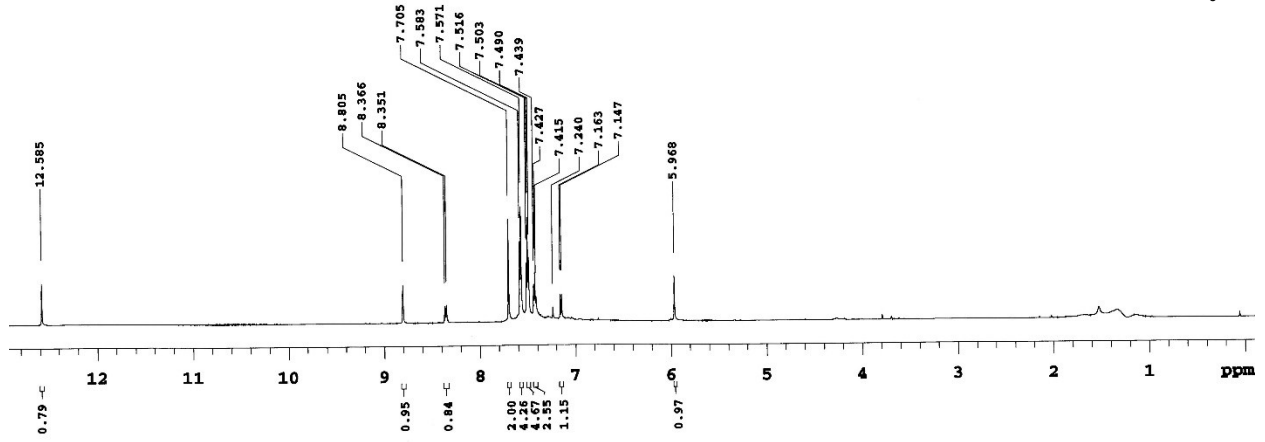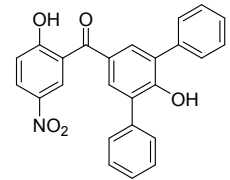

<sup>13</sup>C NMR of **3h**  
150 MHz, CDCl<sub>3</sub>

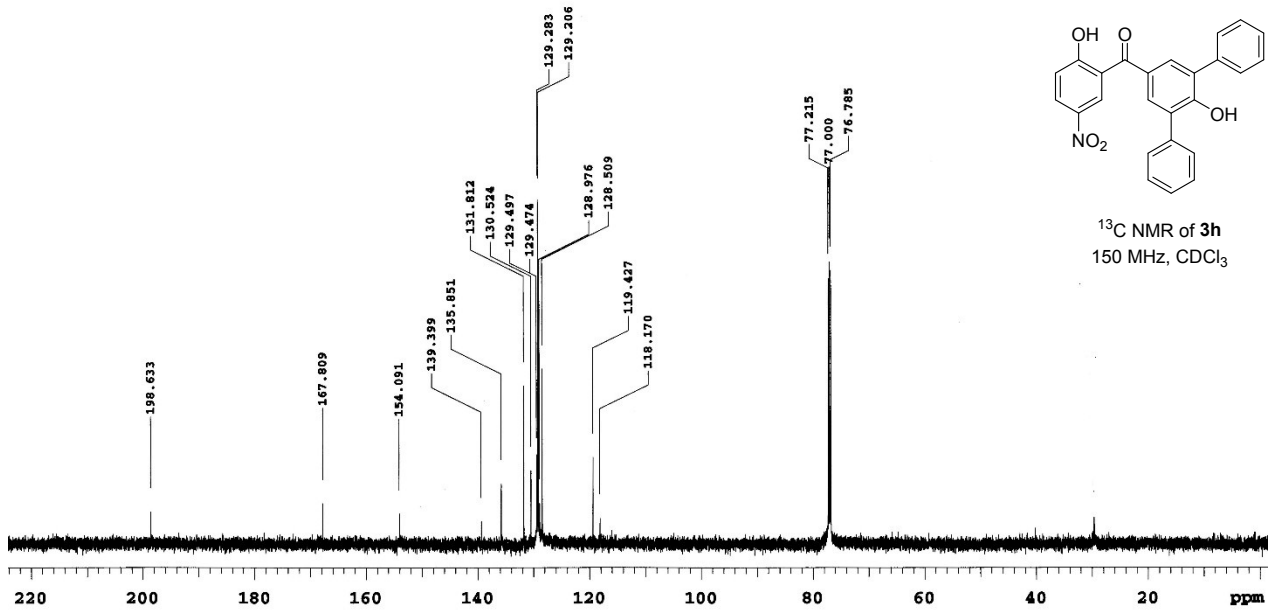

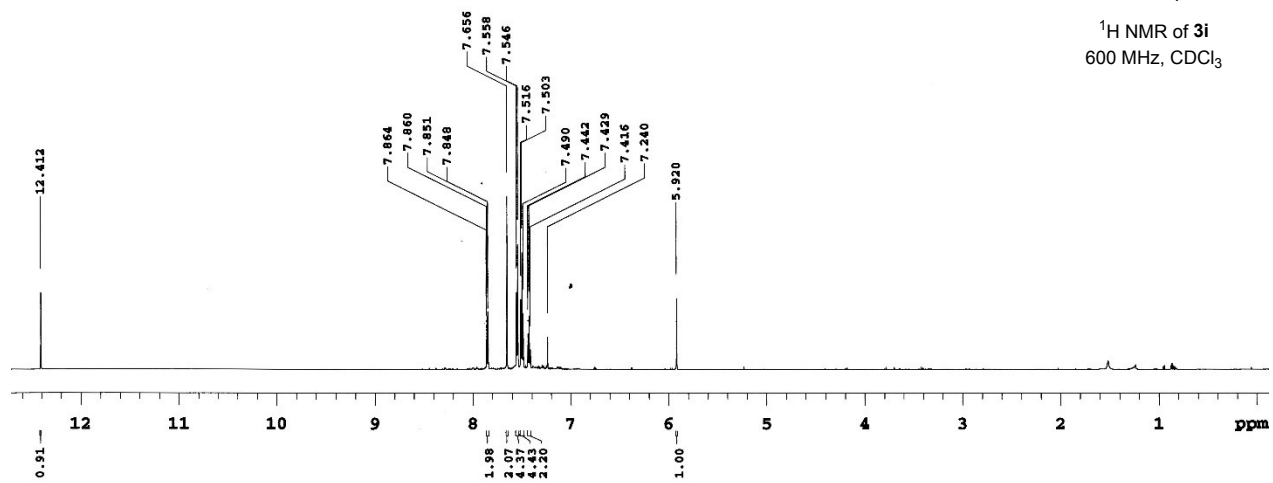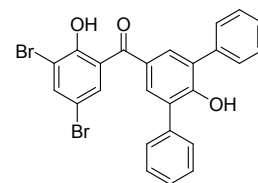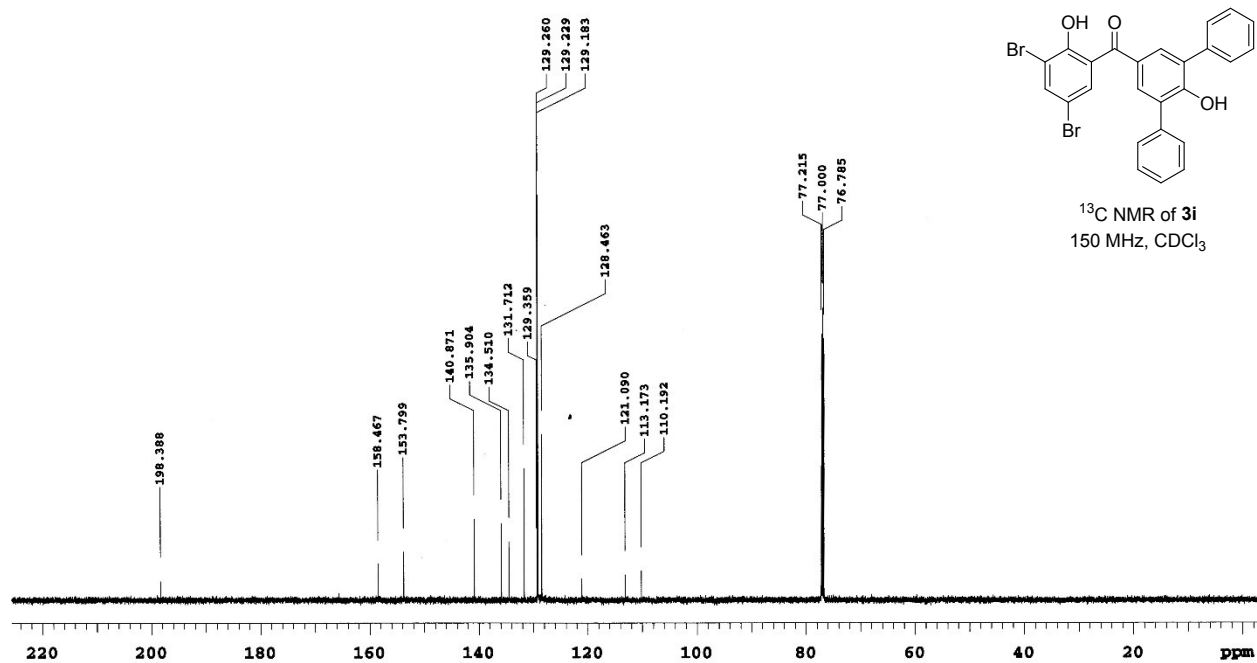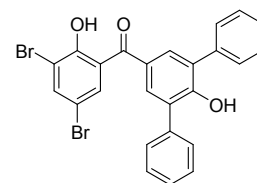

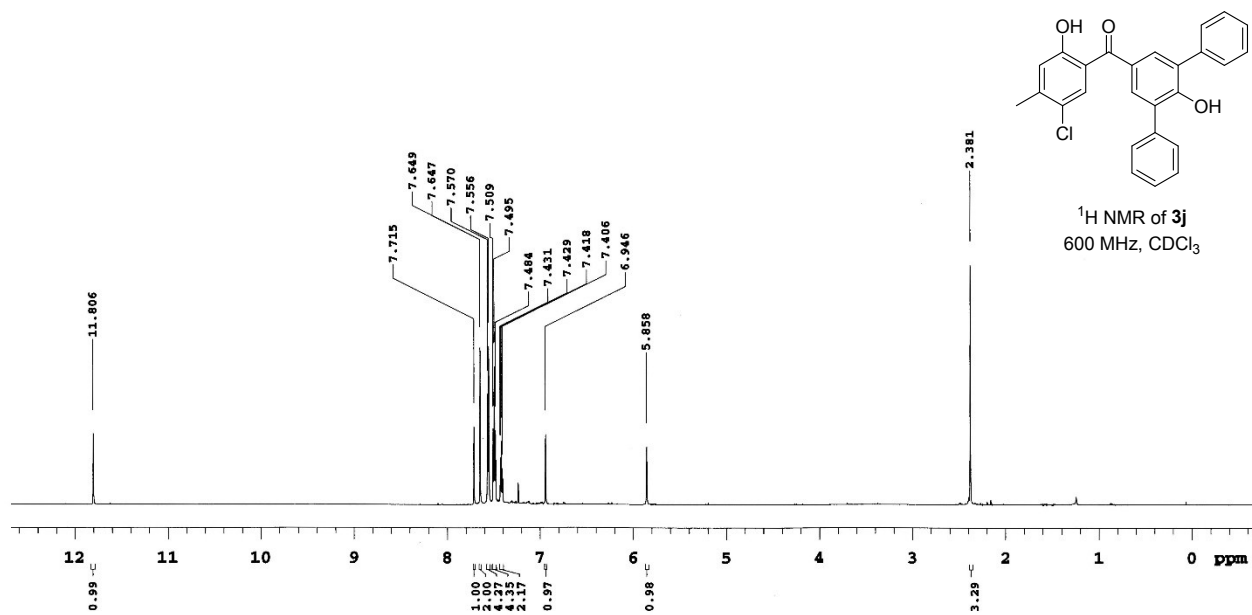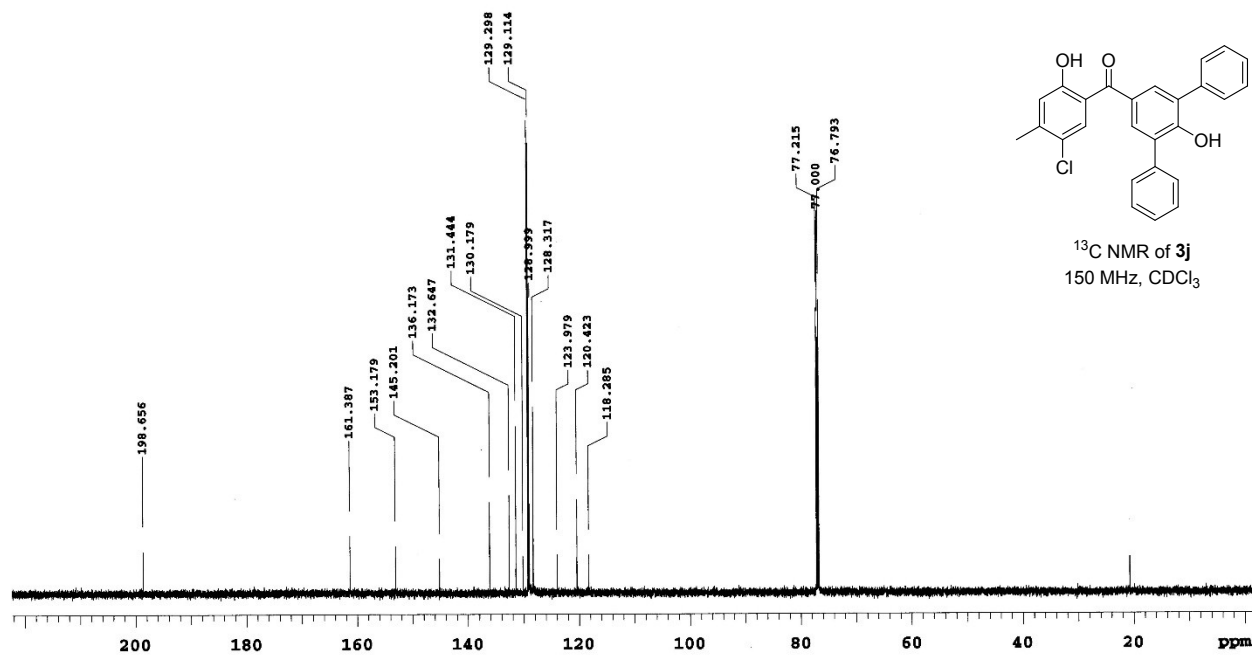

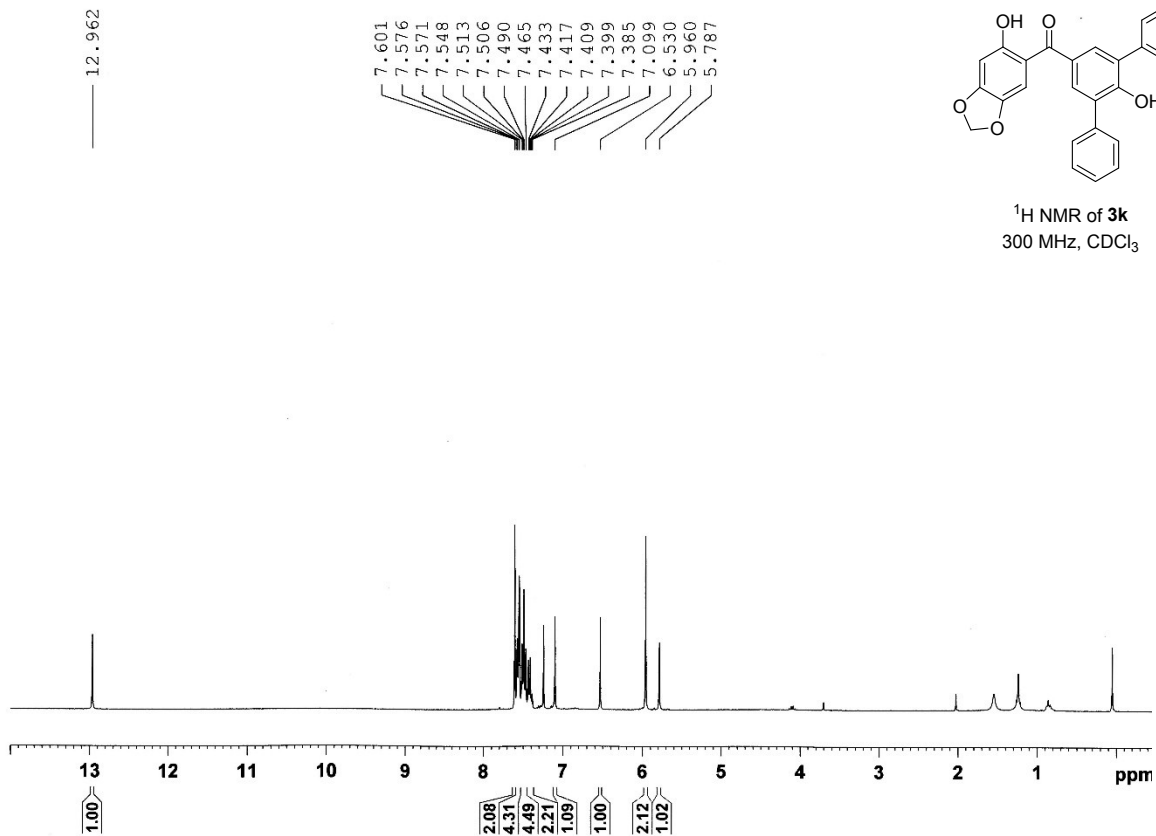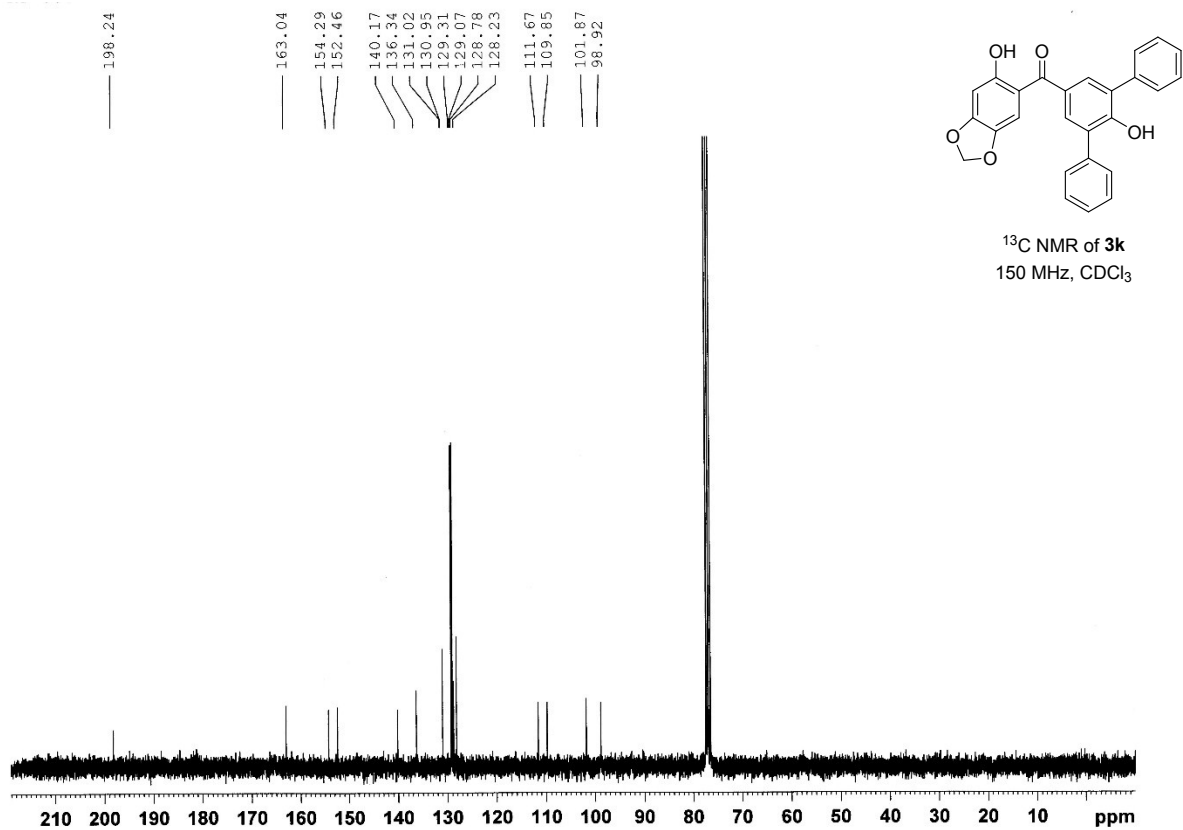

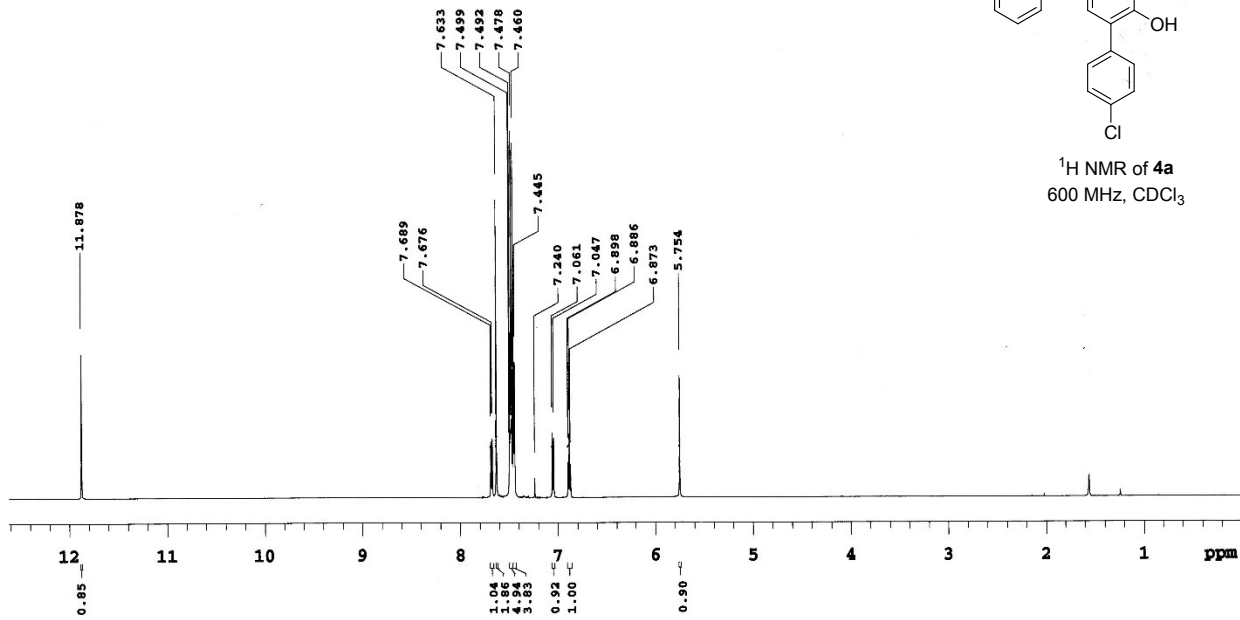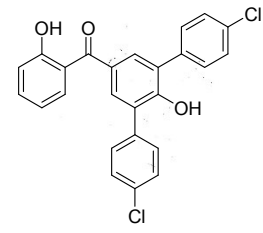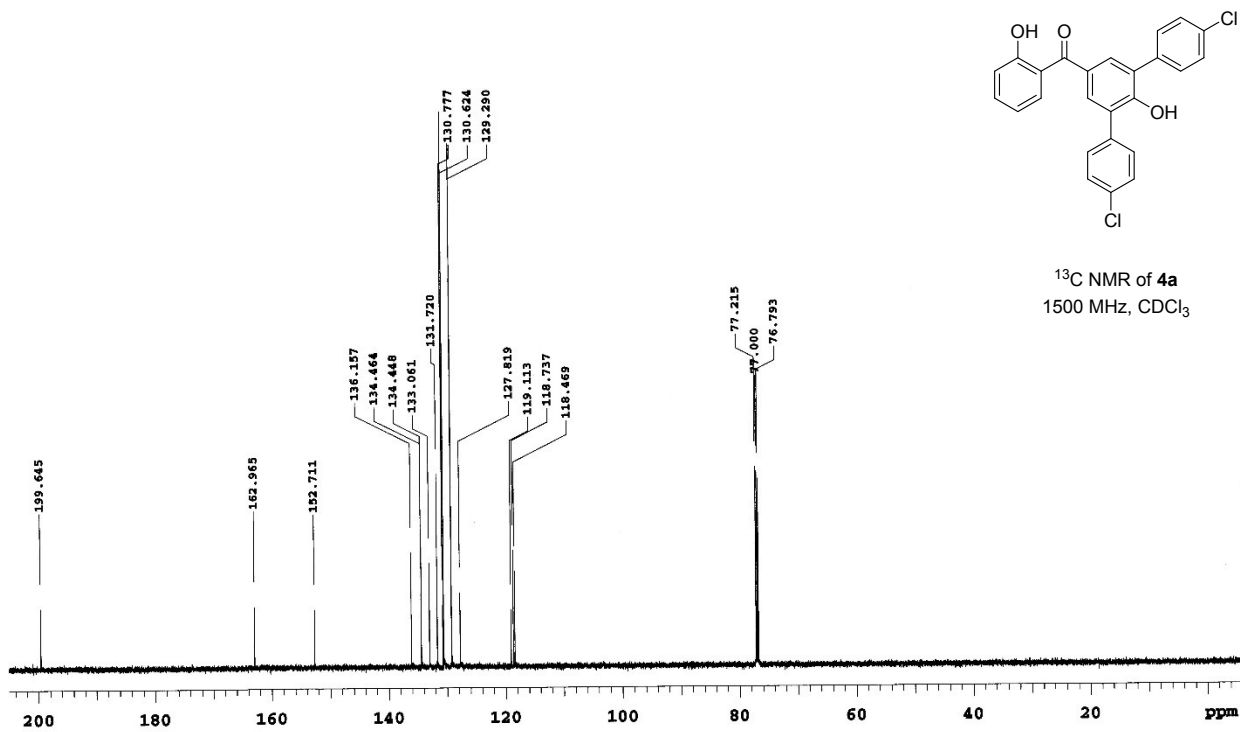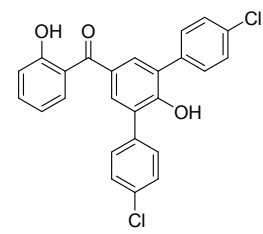

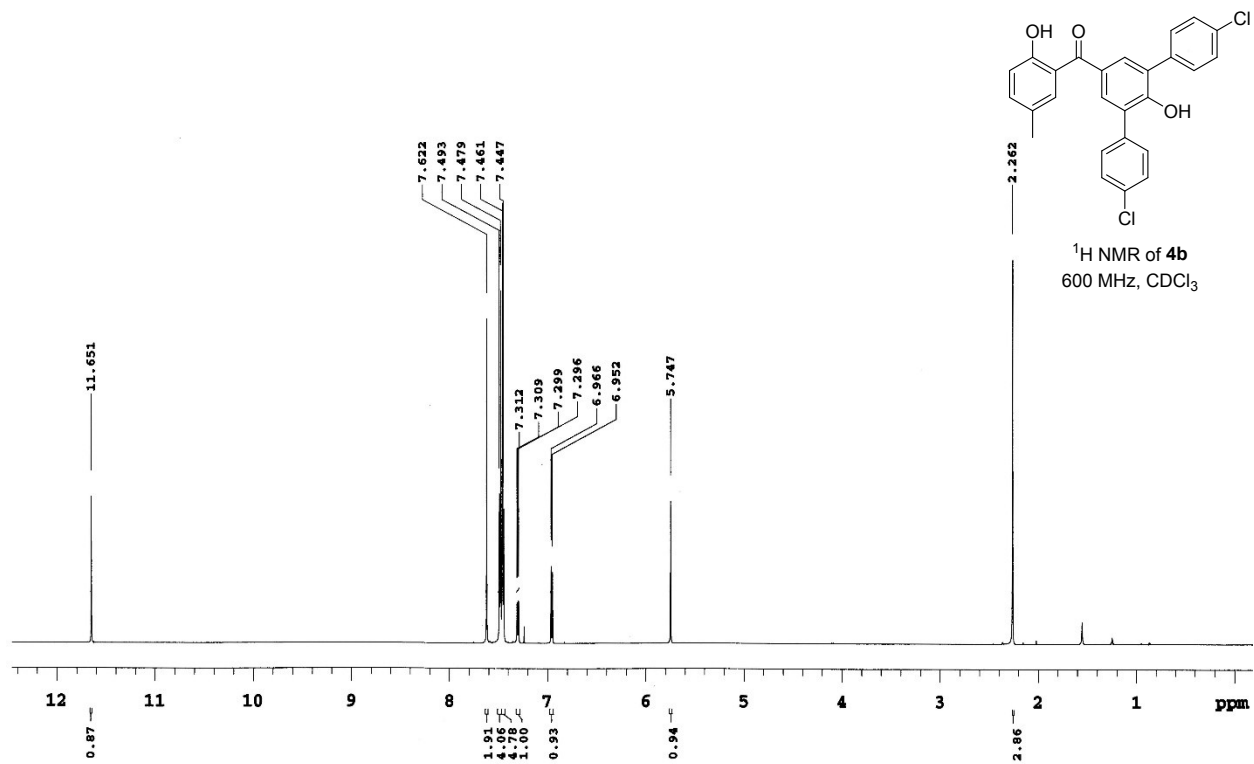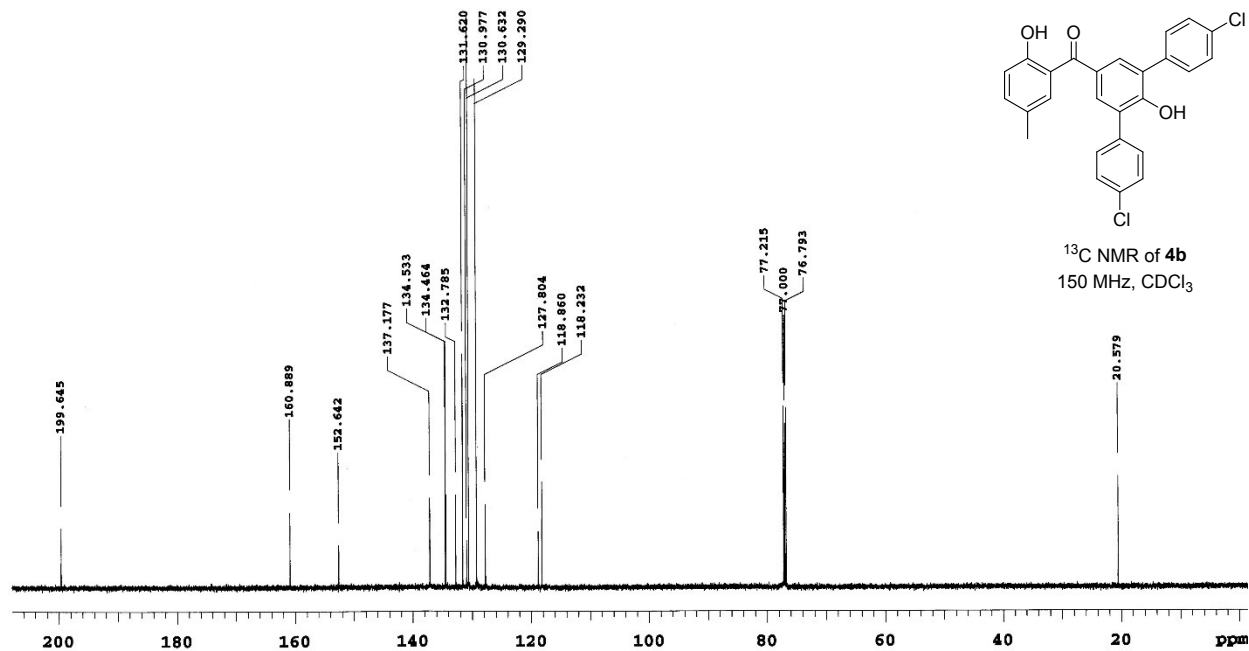

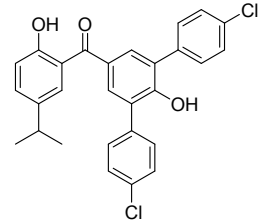

<sup>1</sup>H NMR of 4c  
300 MHz, CDCl<sub>3</sub>

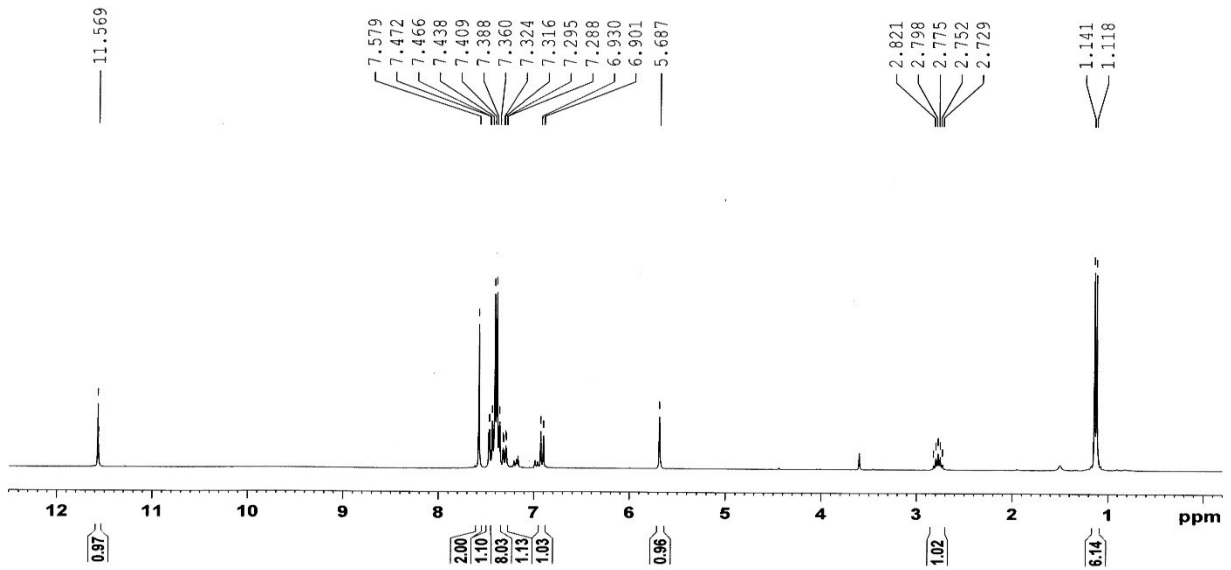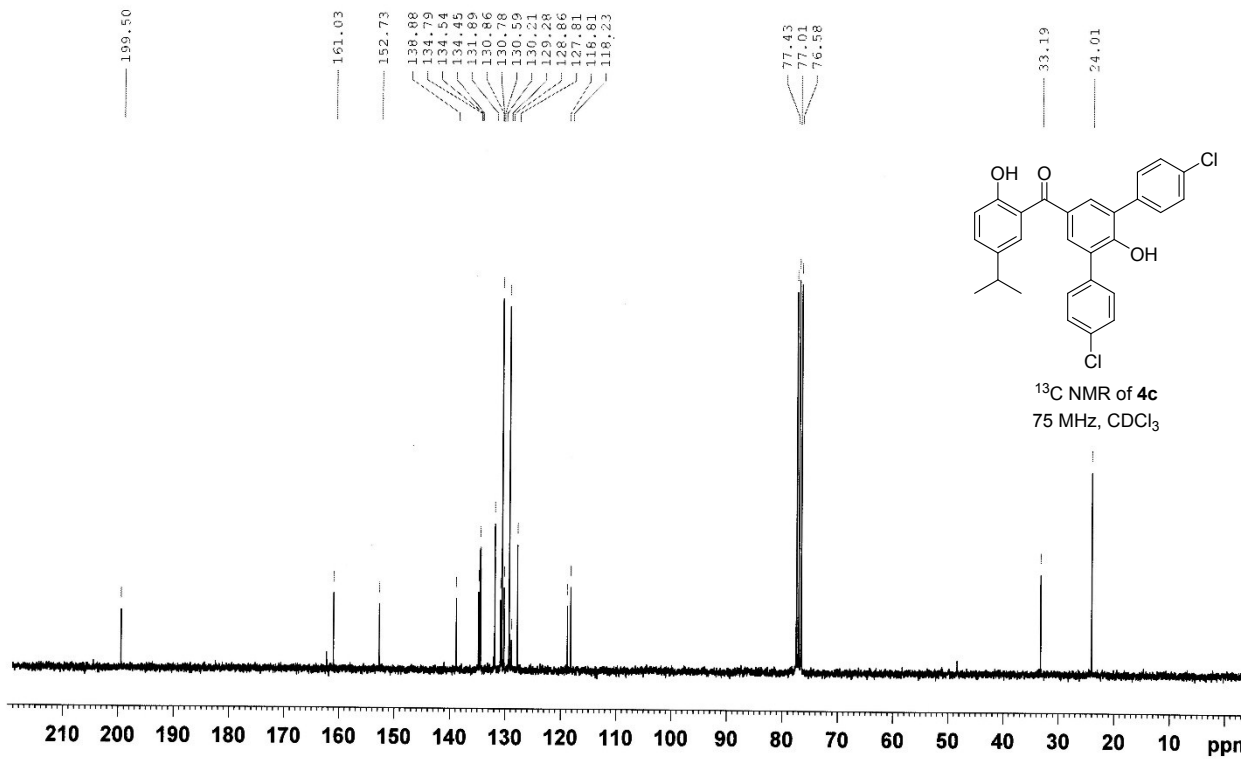

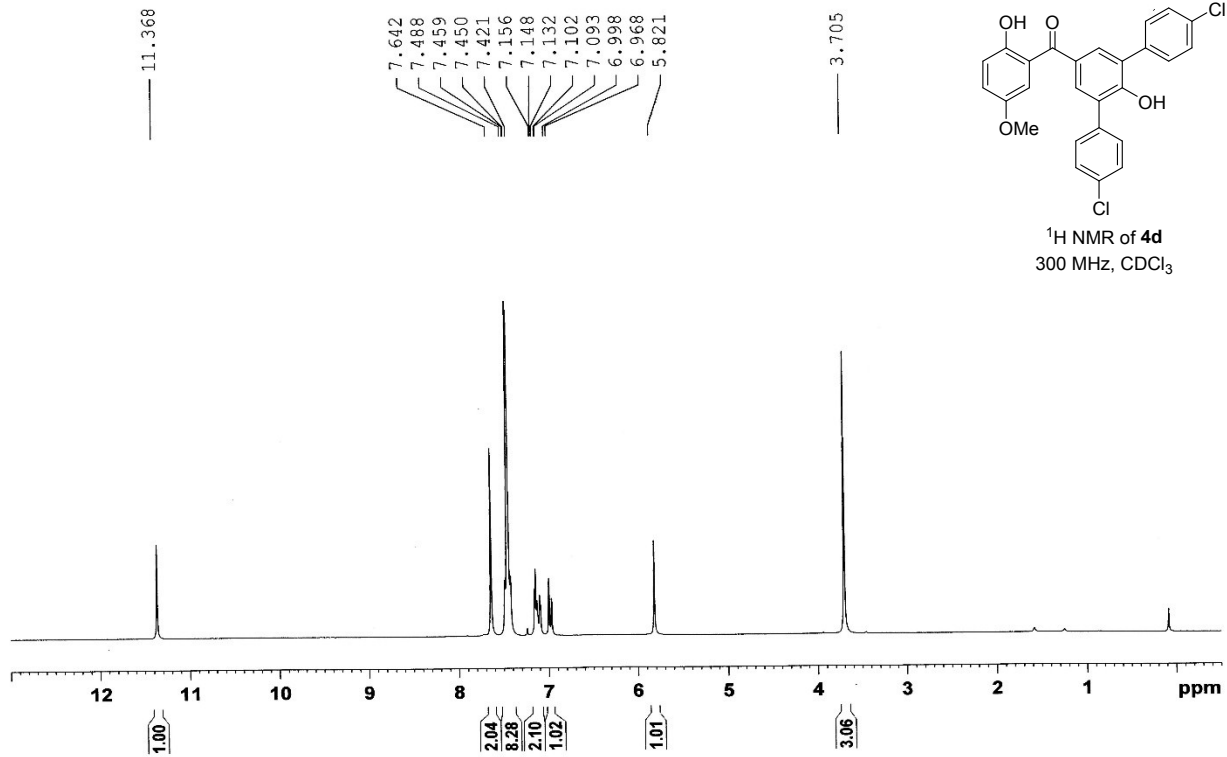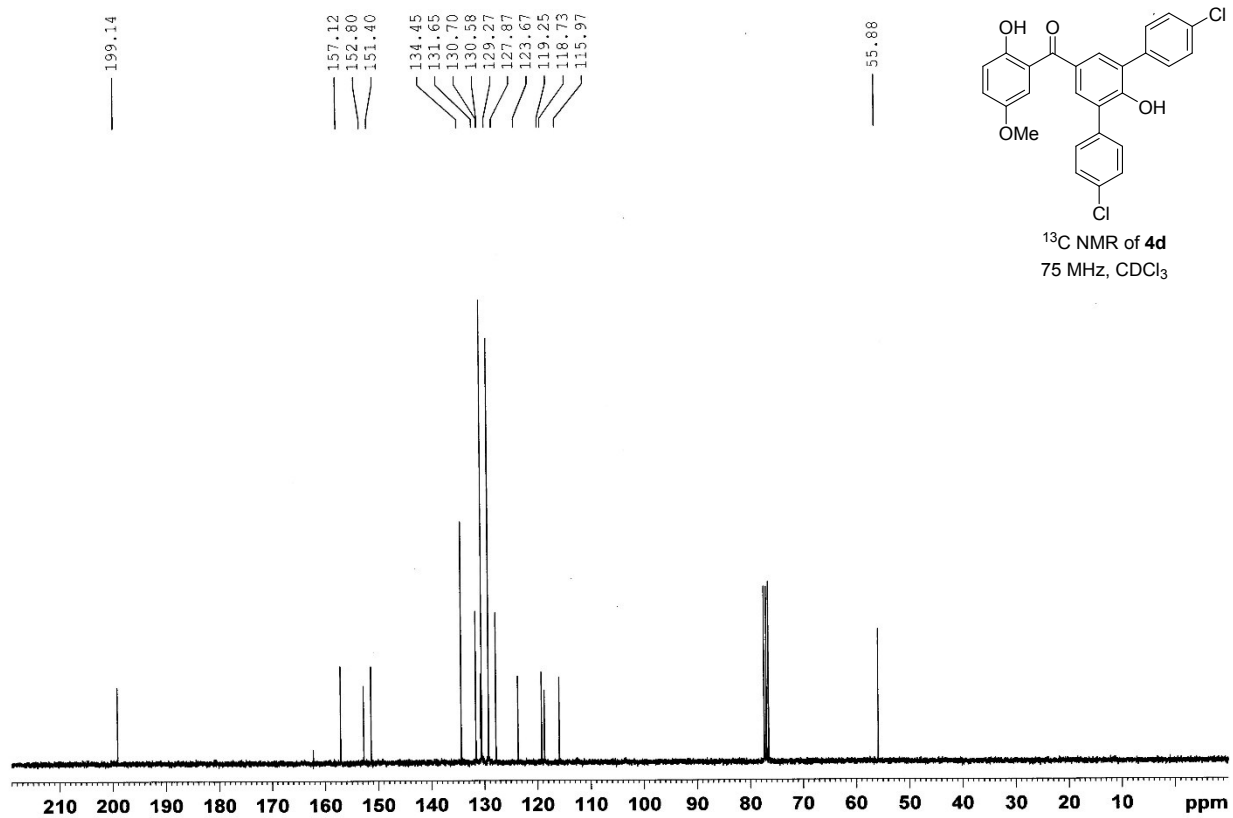



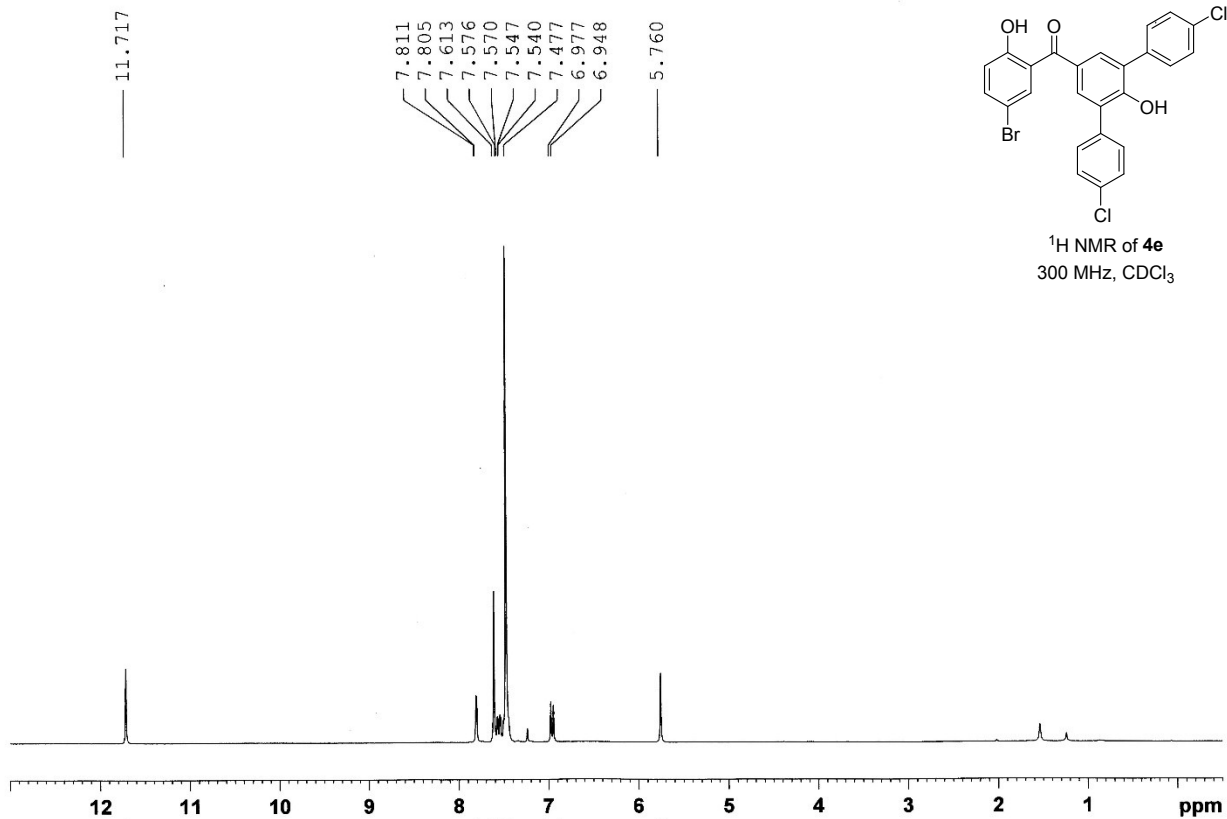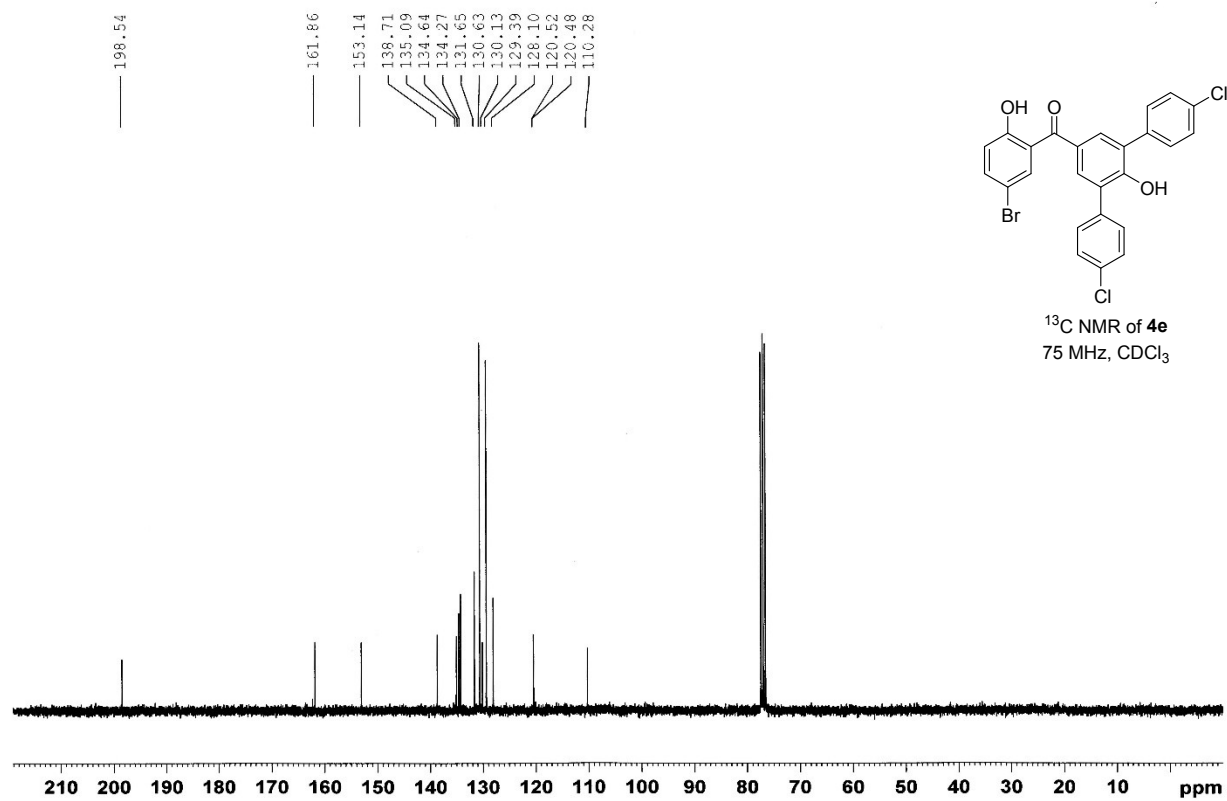

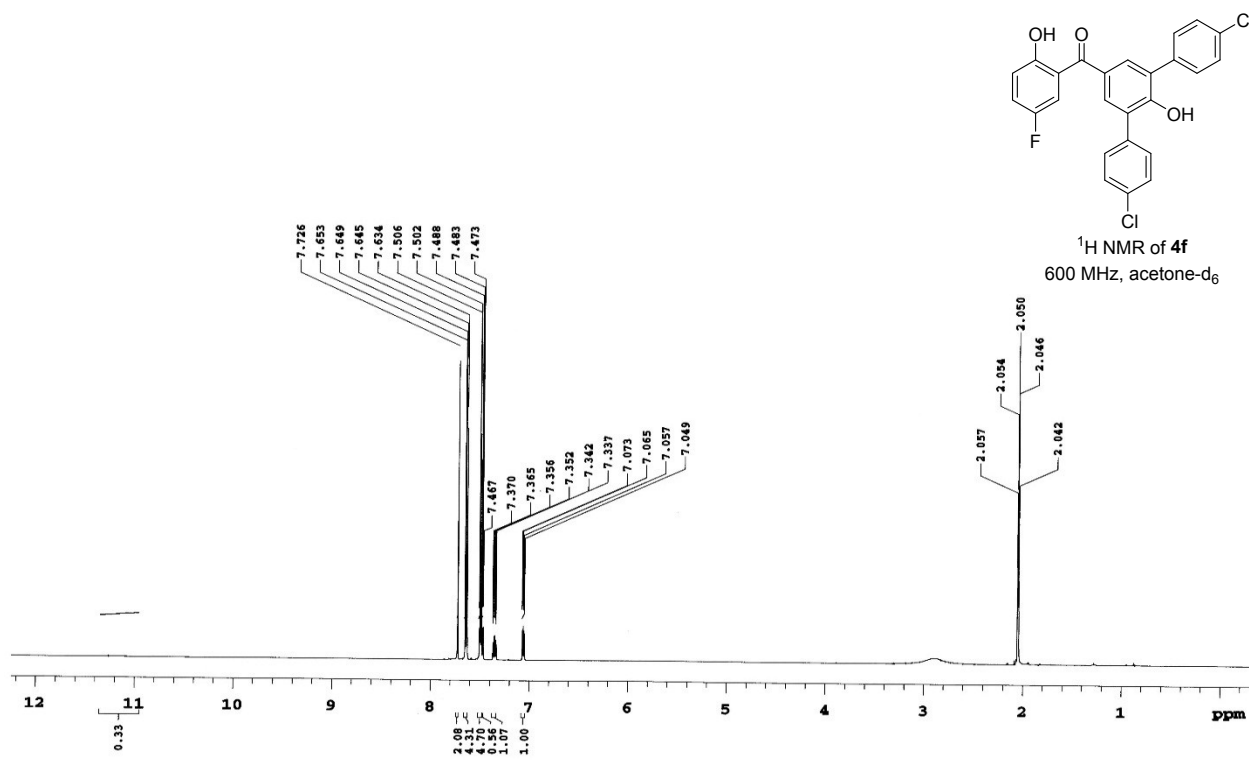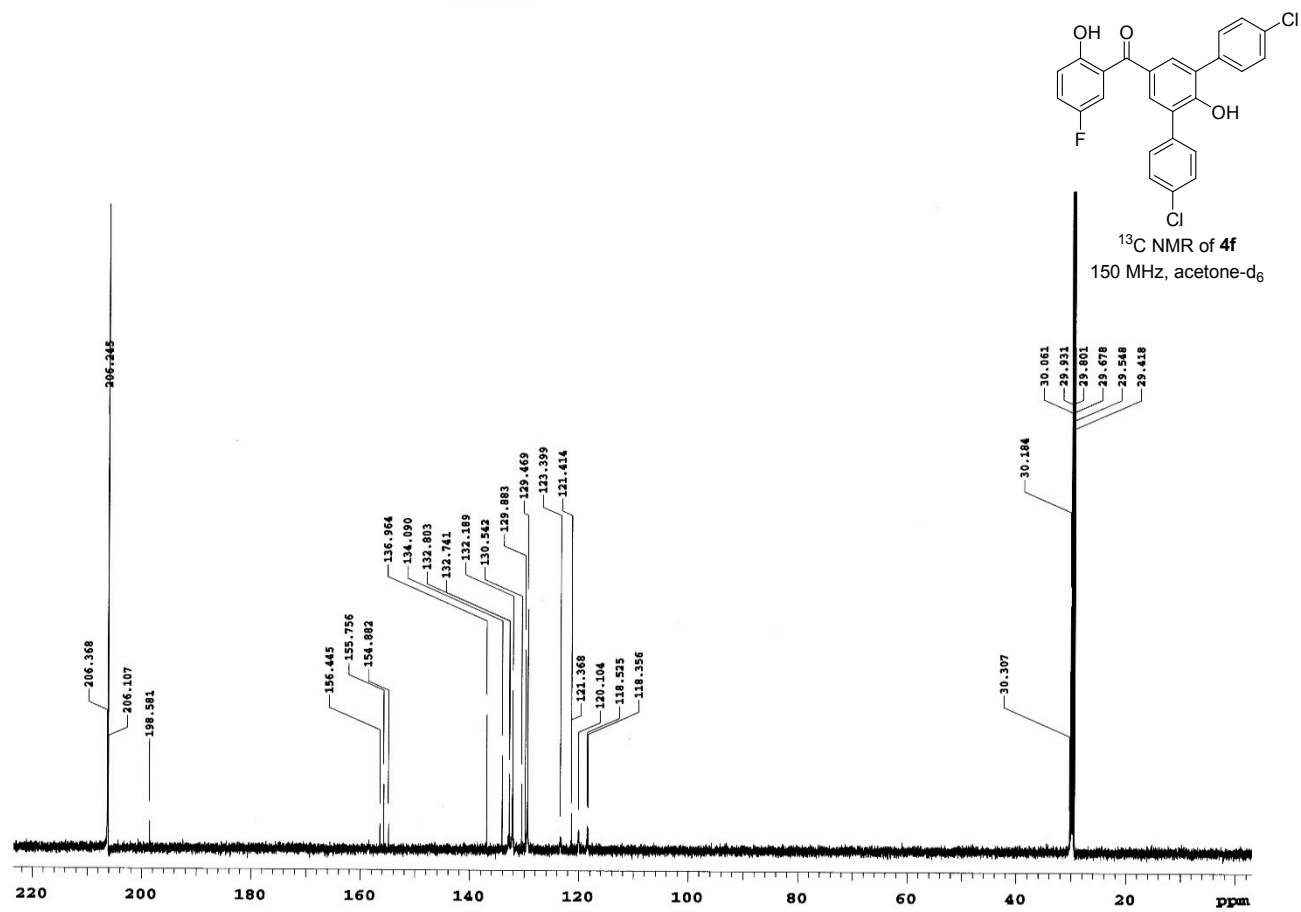

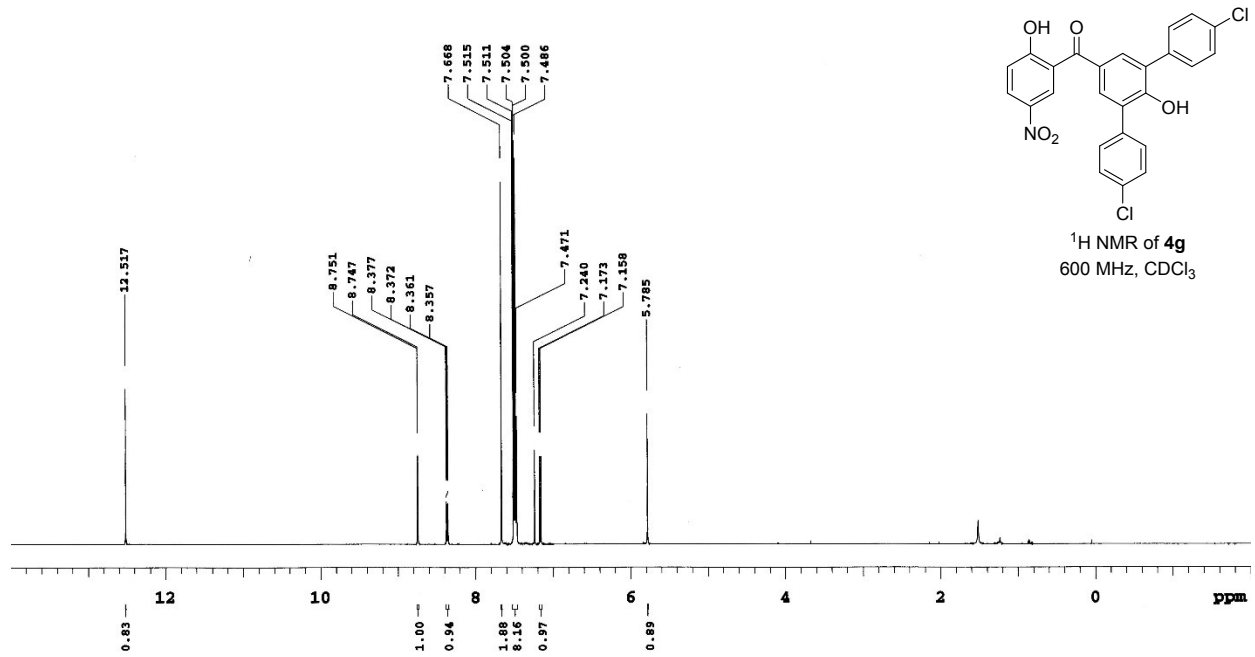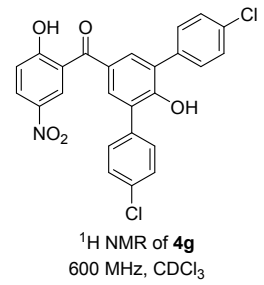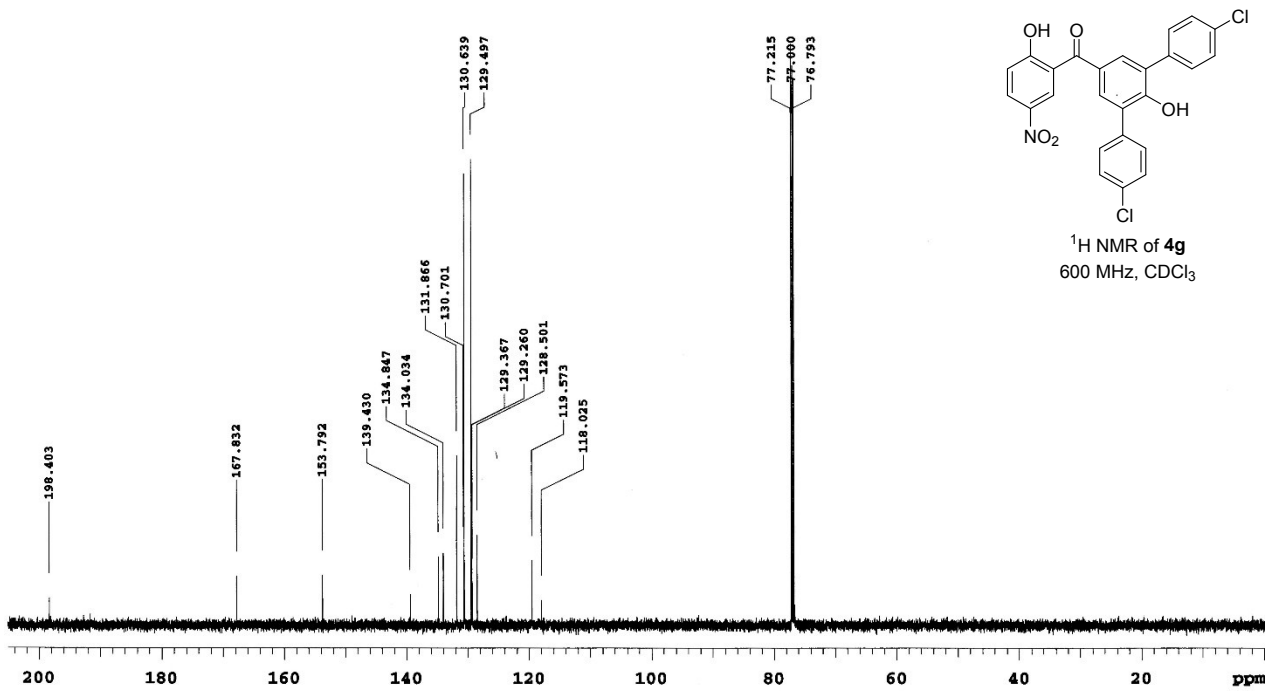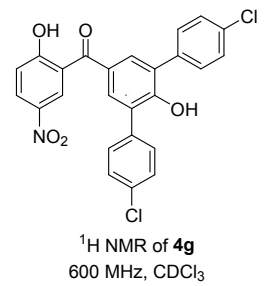

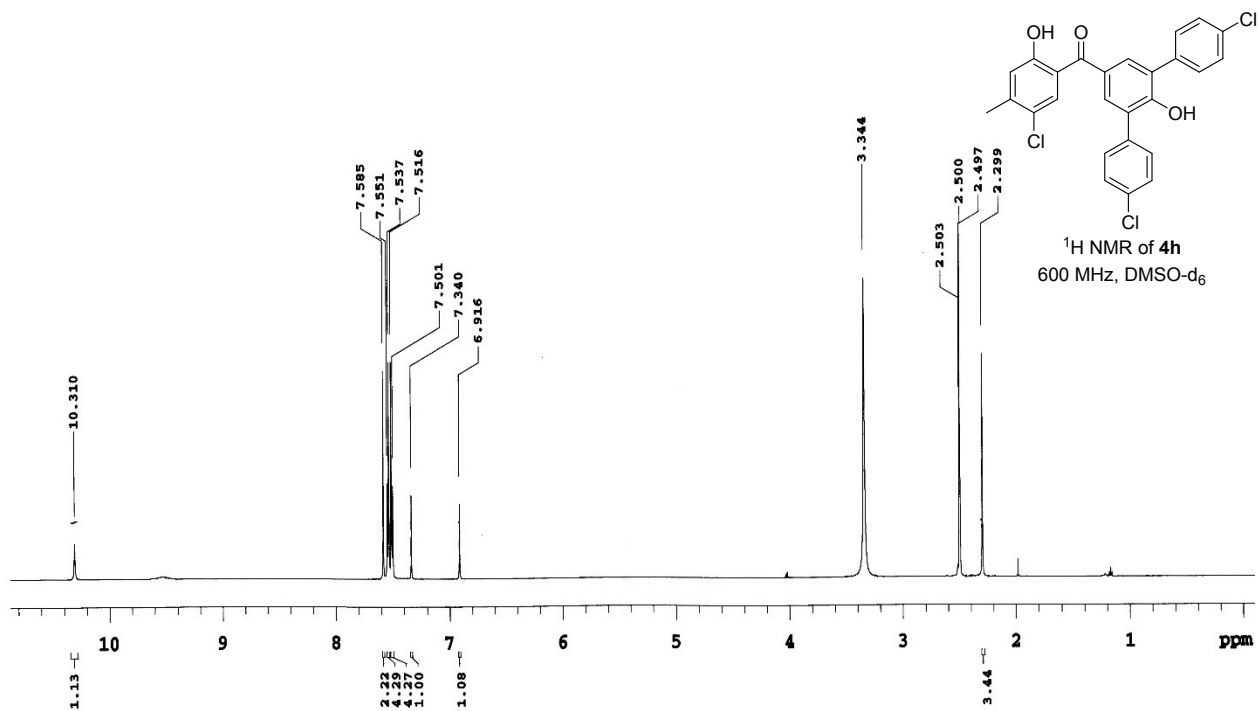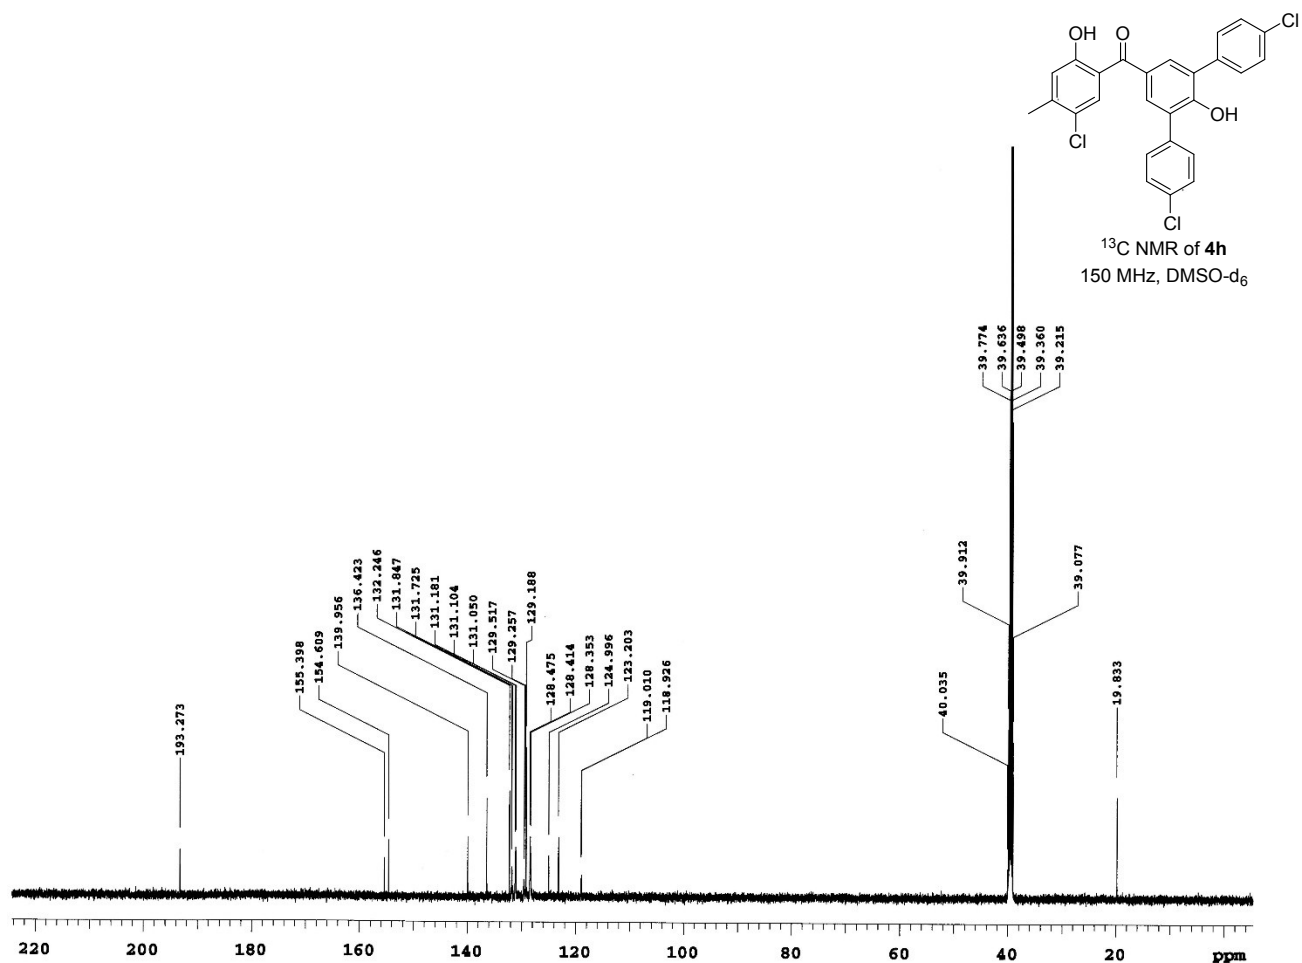

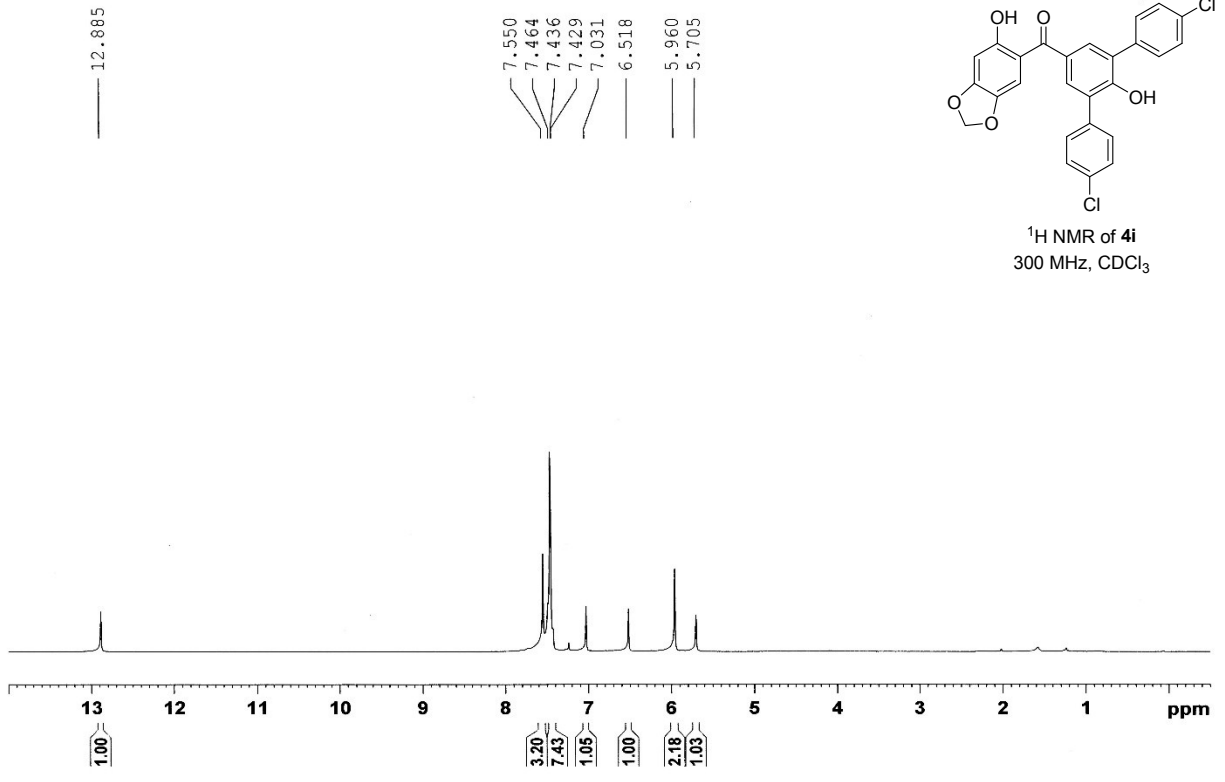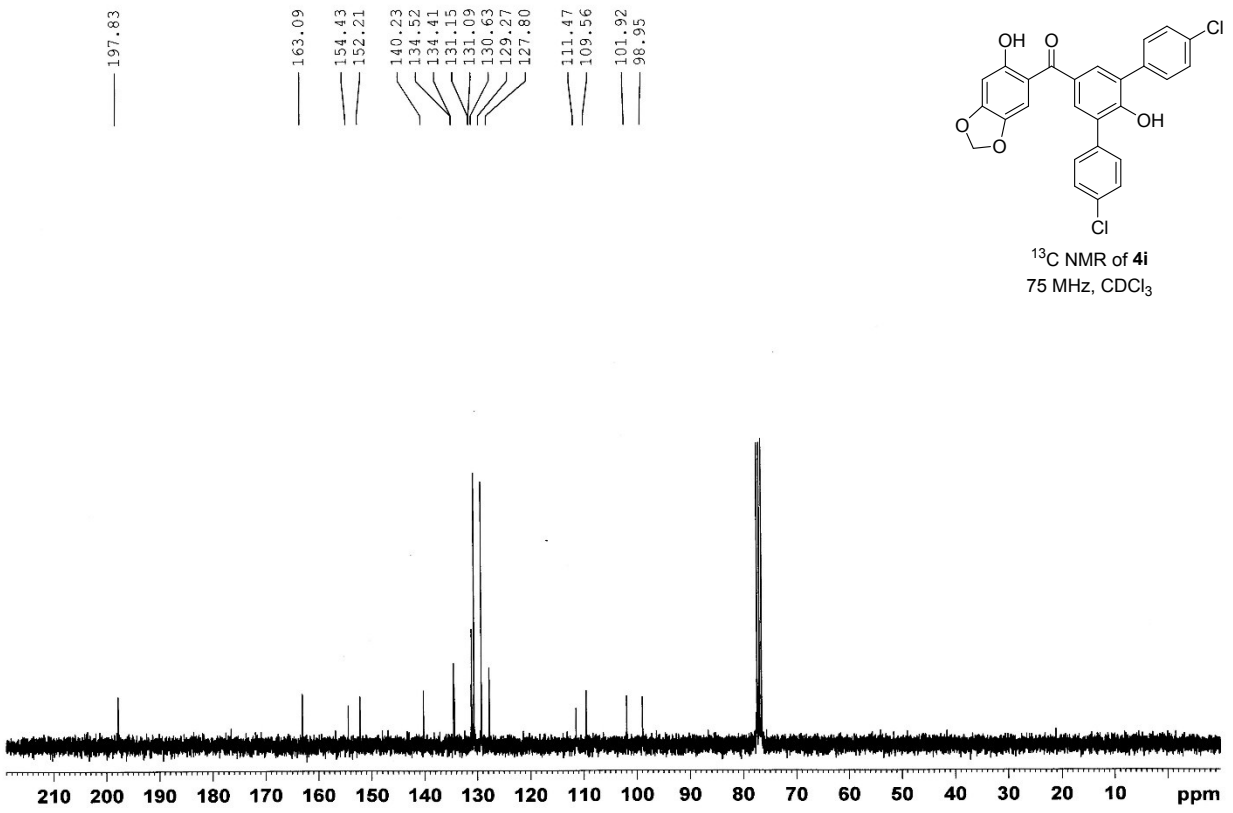

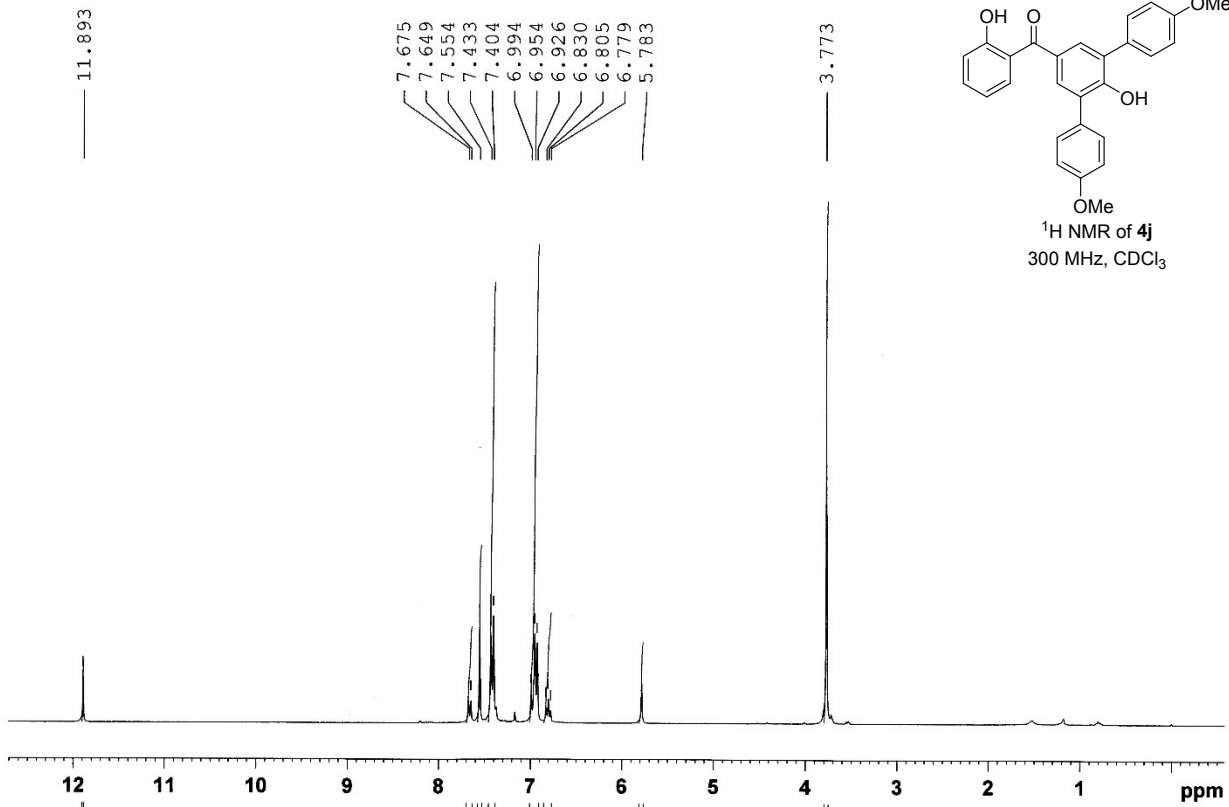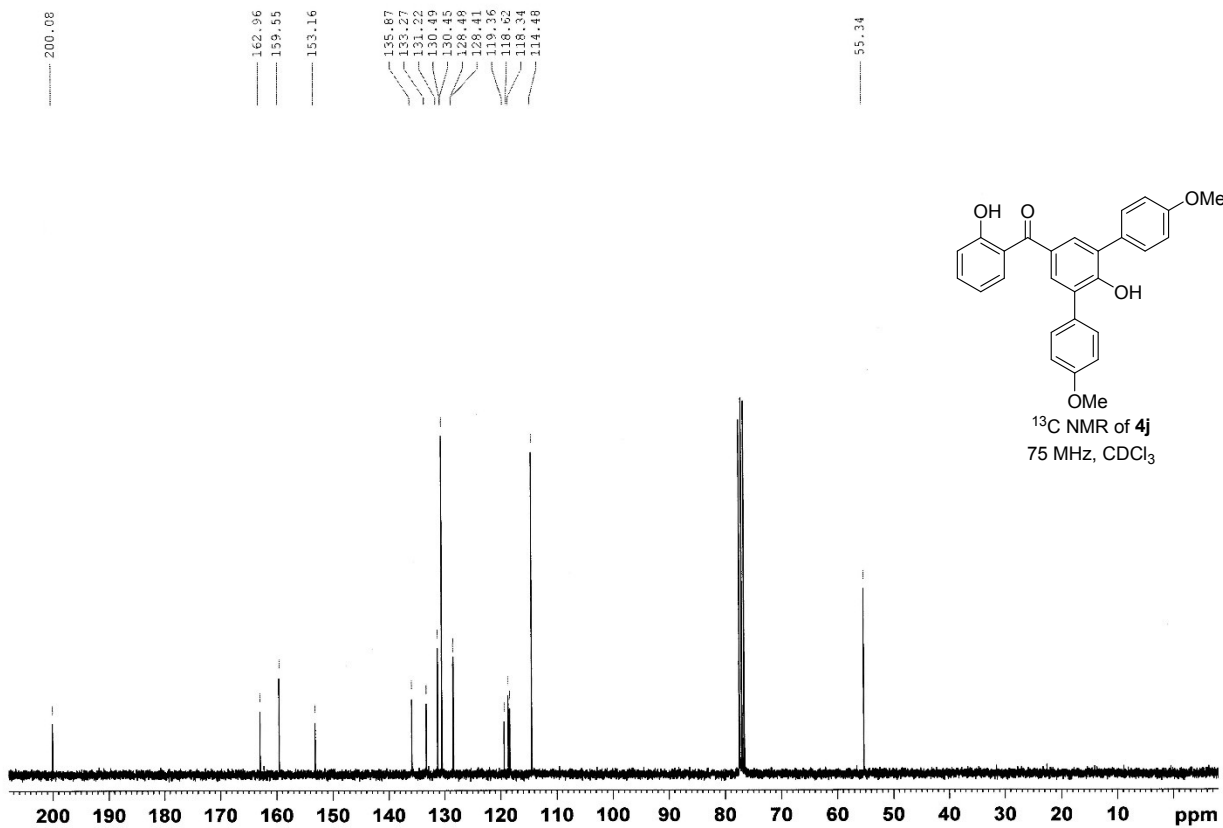

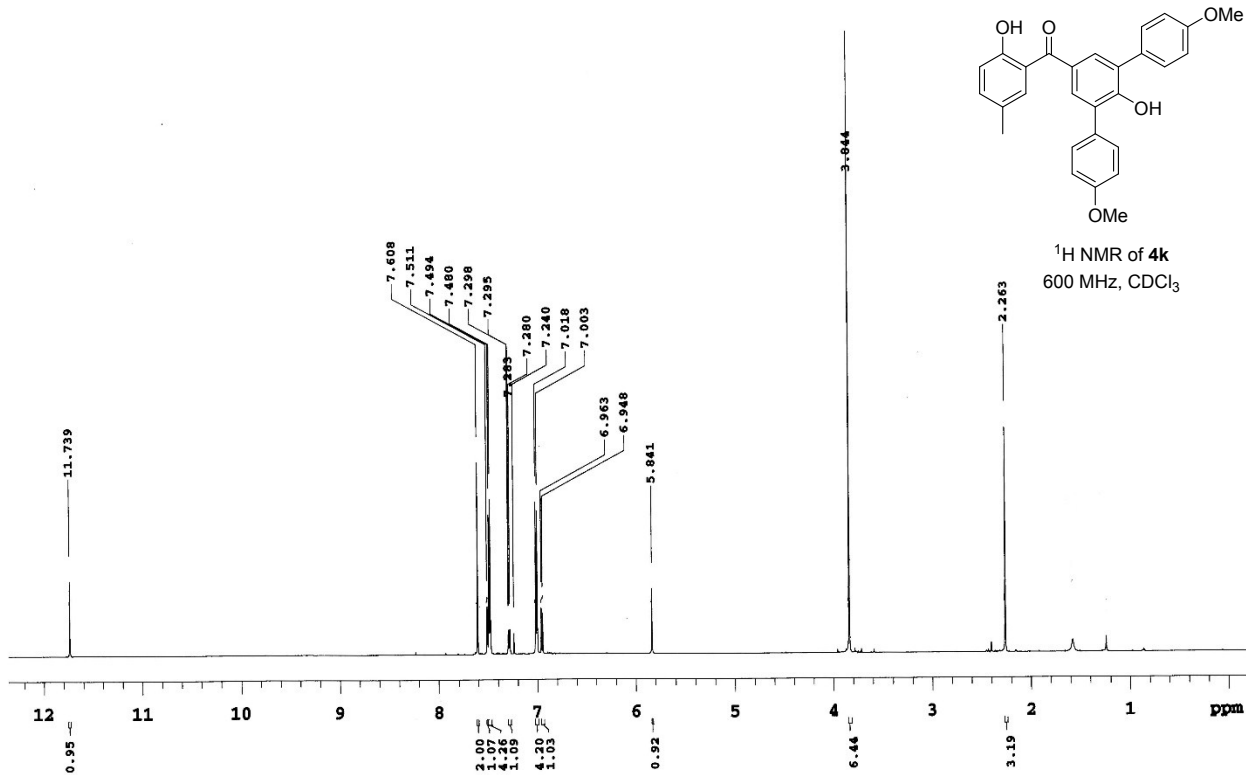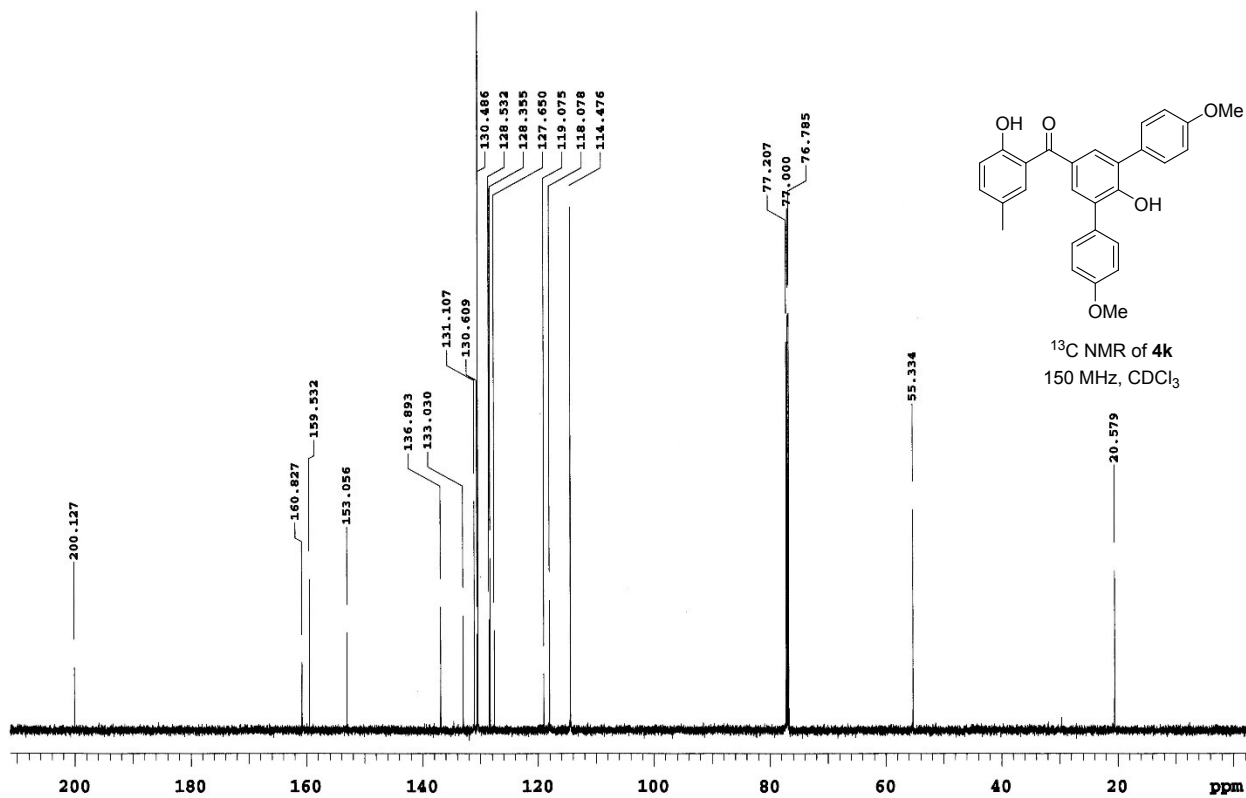

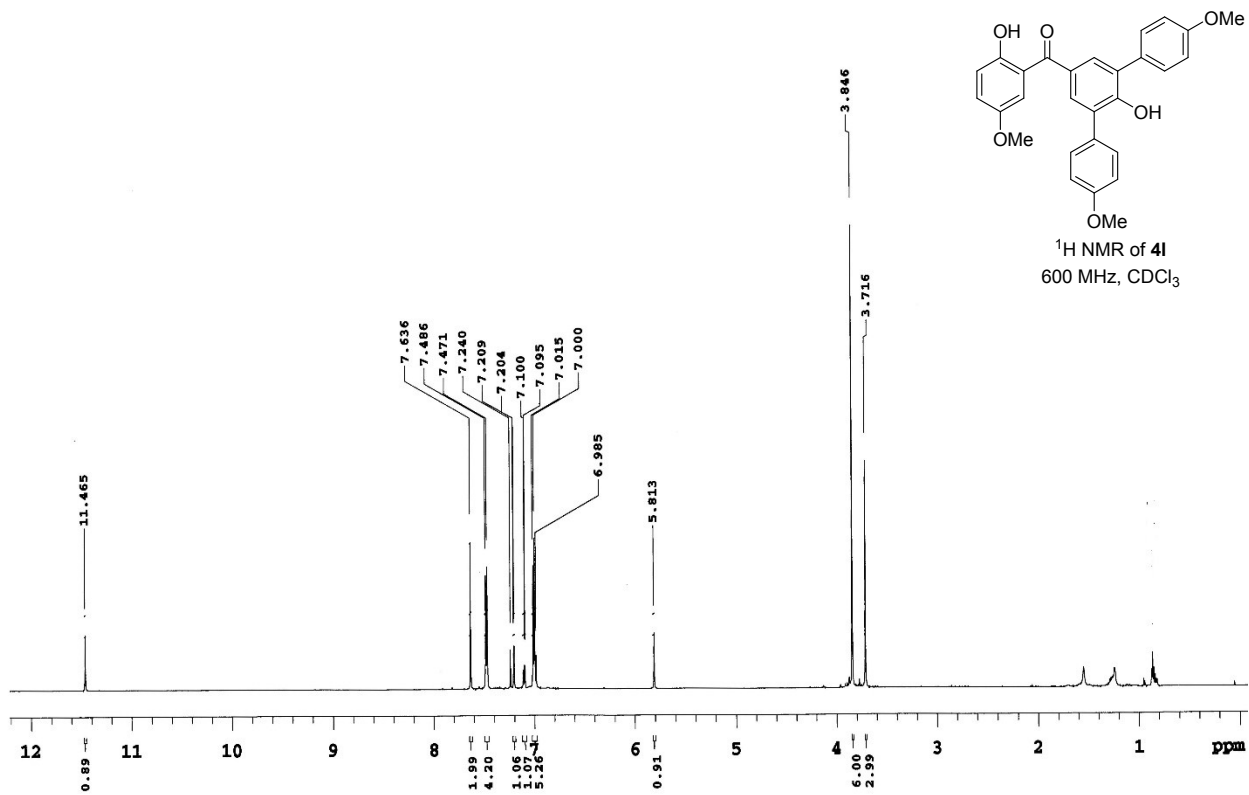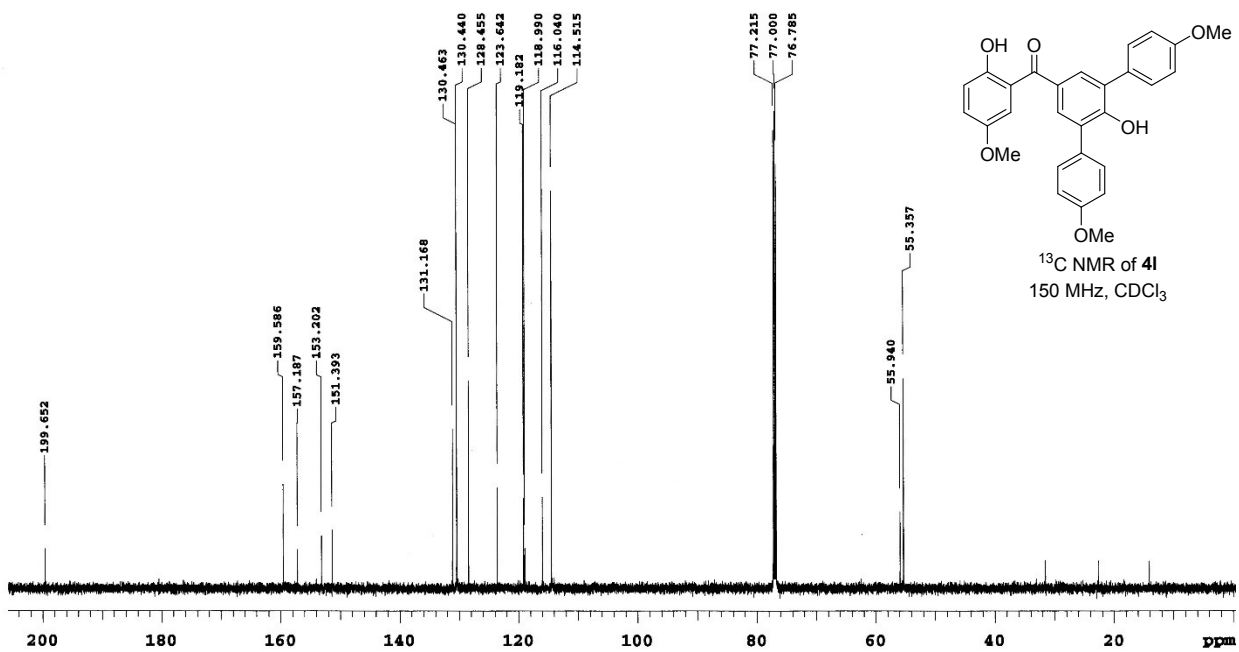



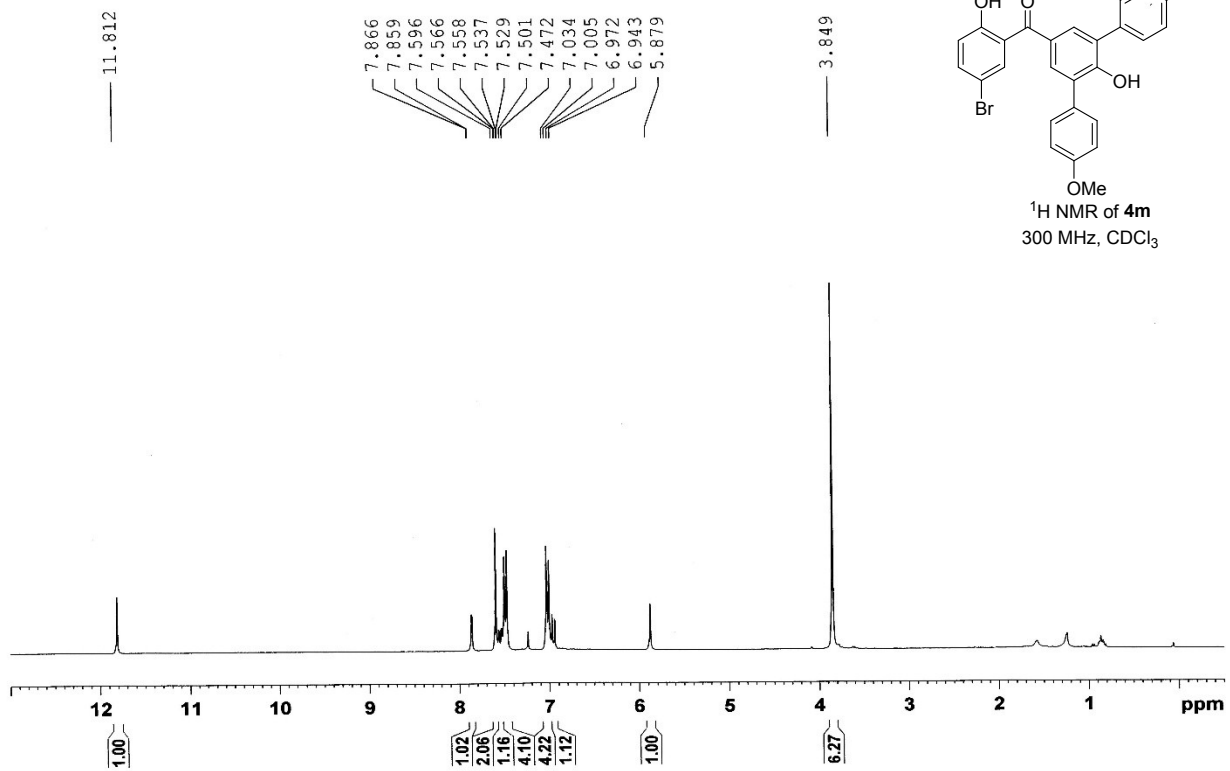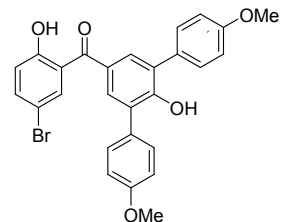

<sup>1</sup>H NMR of 4m  
300 MHz, CDCl<sub>3</sub>

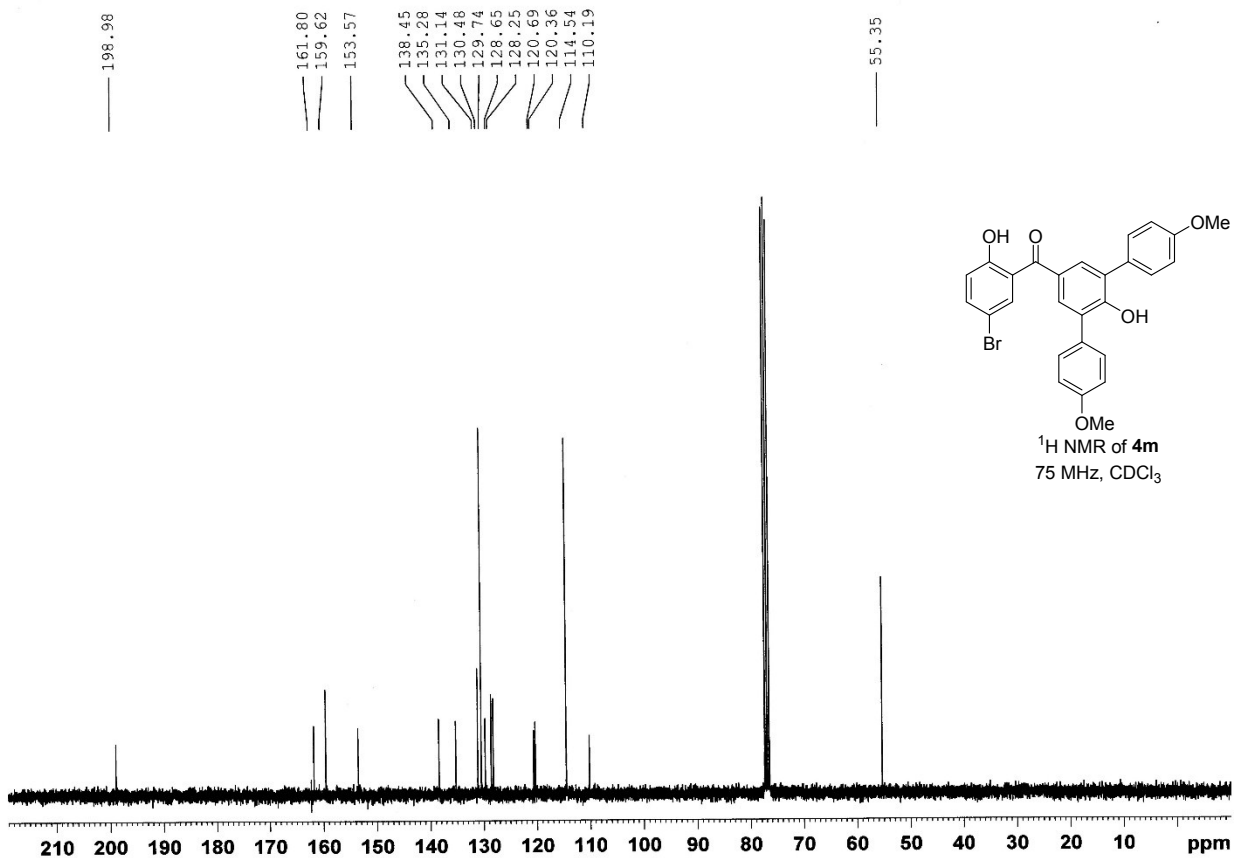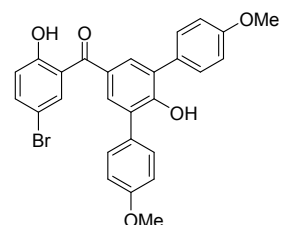

<sup>13</sup>C NMR of 4m  
75 MHz, CDCl<sub>3</sub>

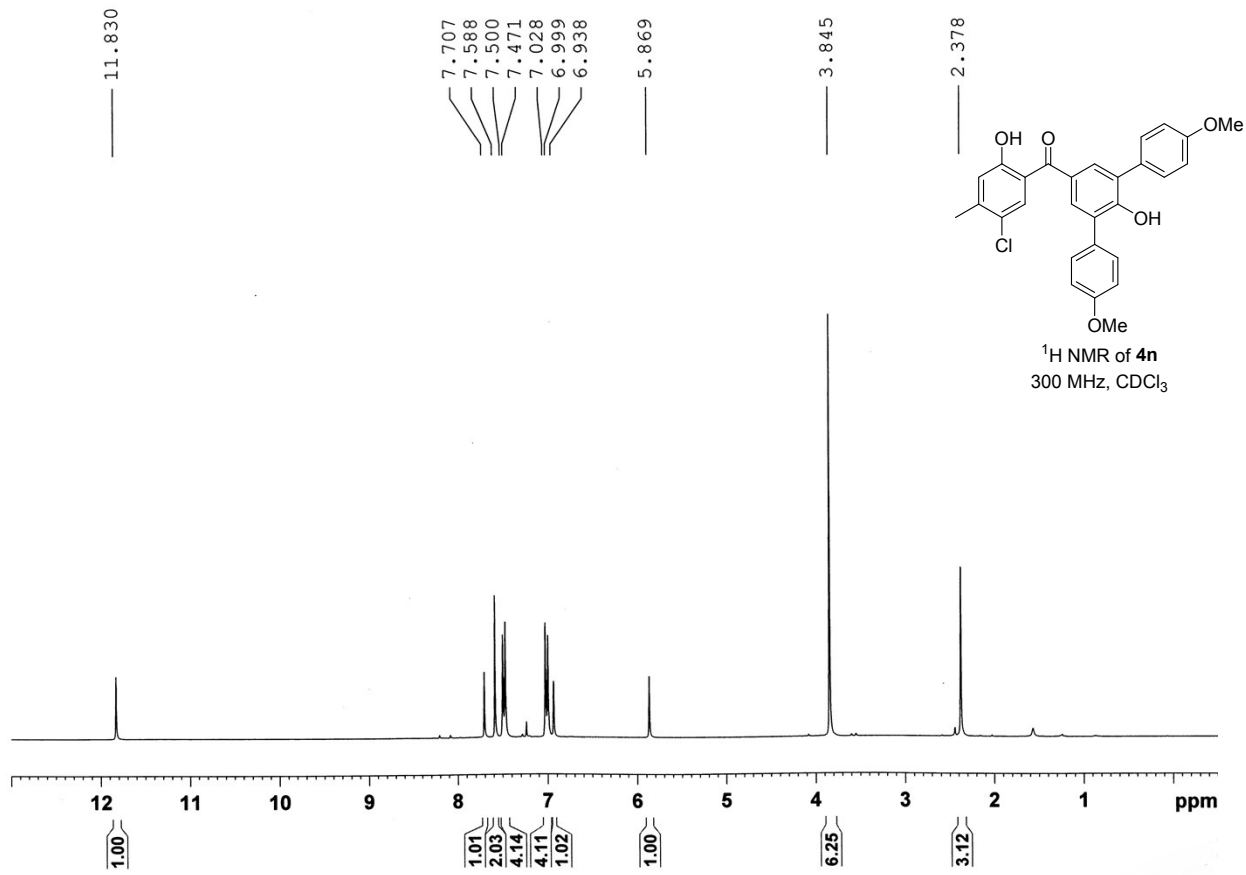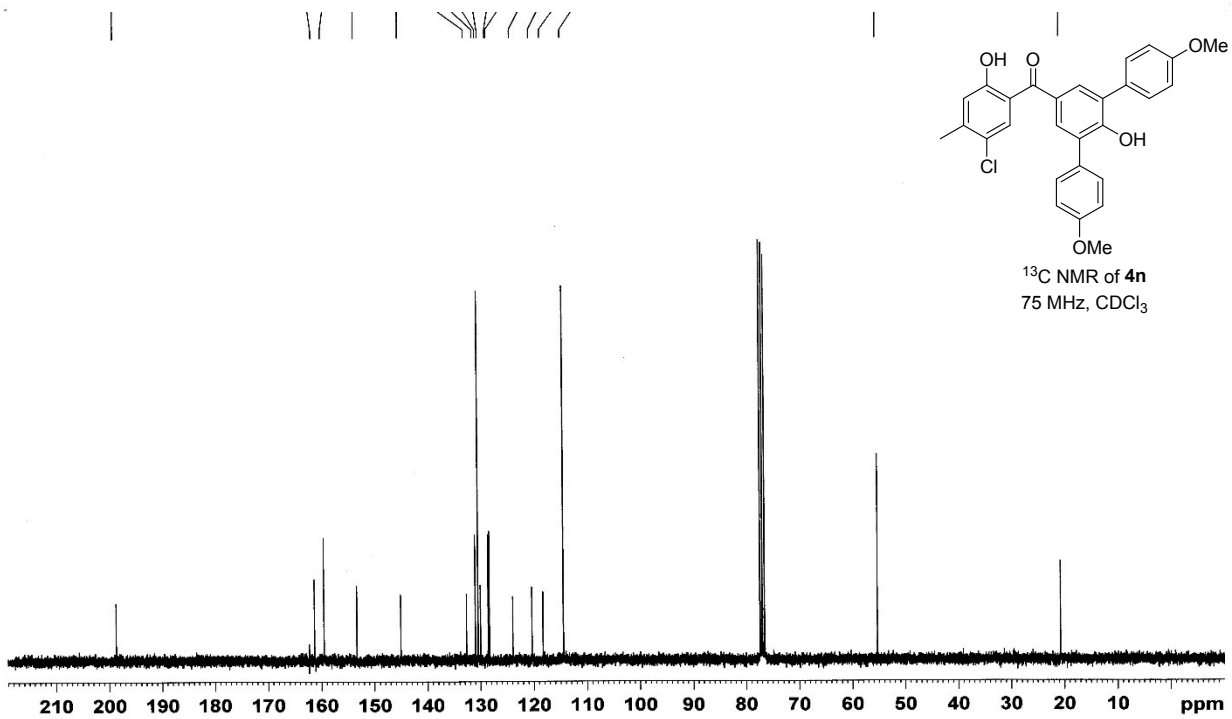

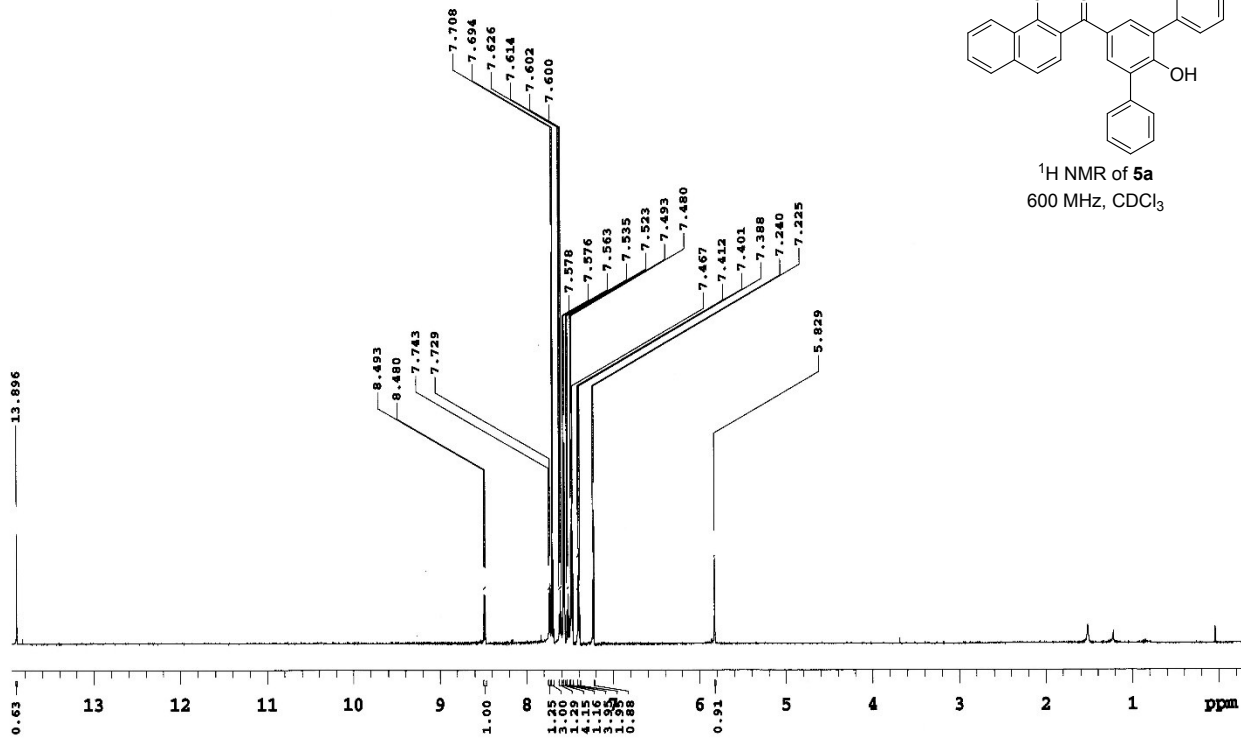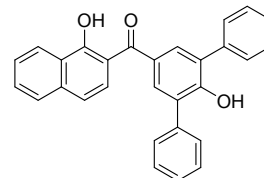

**<sup>1</sup>H NMR of 5a**  
600 MHz, CDCl<sub>3</sub>

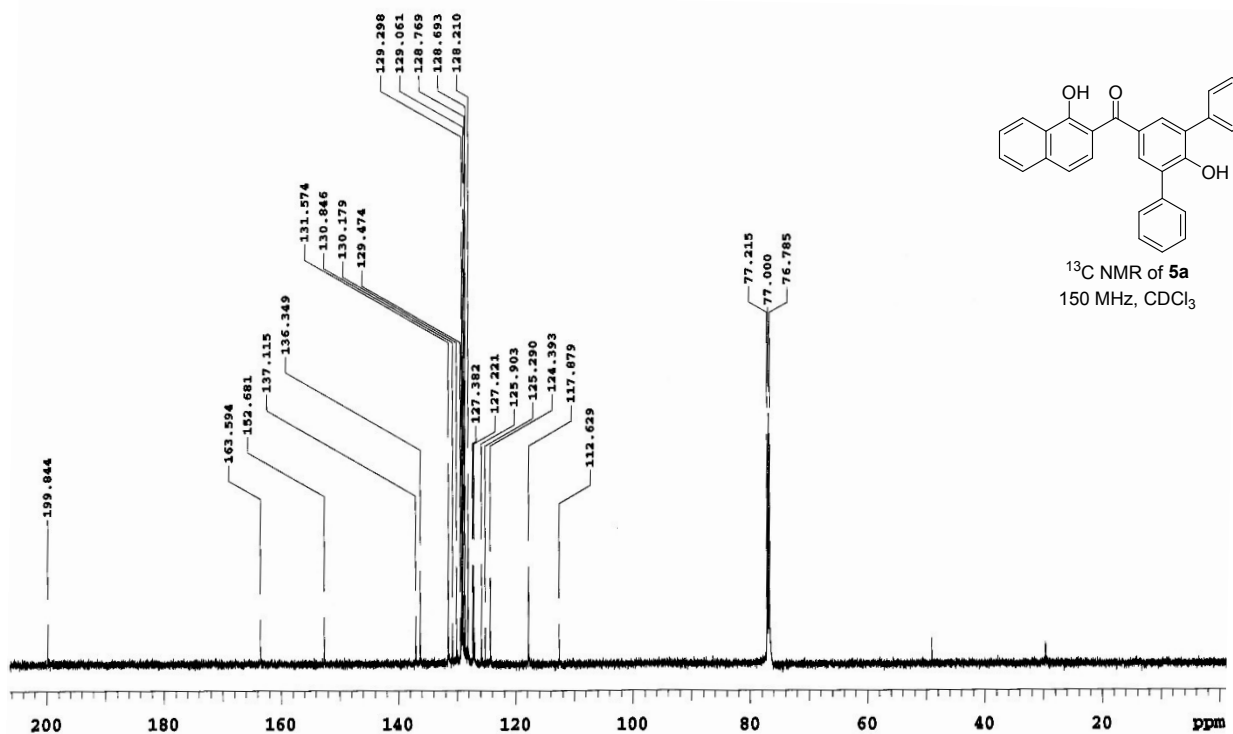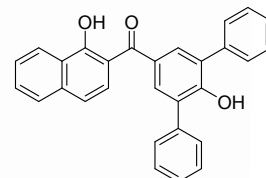

**<sup>13</sup>C NMR of 5a**  
150 MHz, CDCl<sub>3</sub>

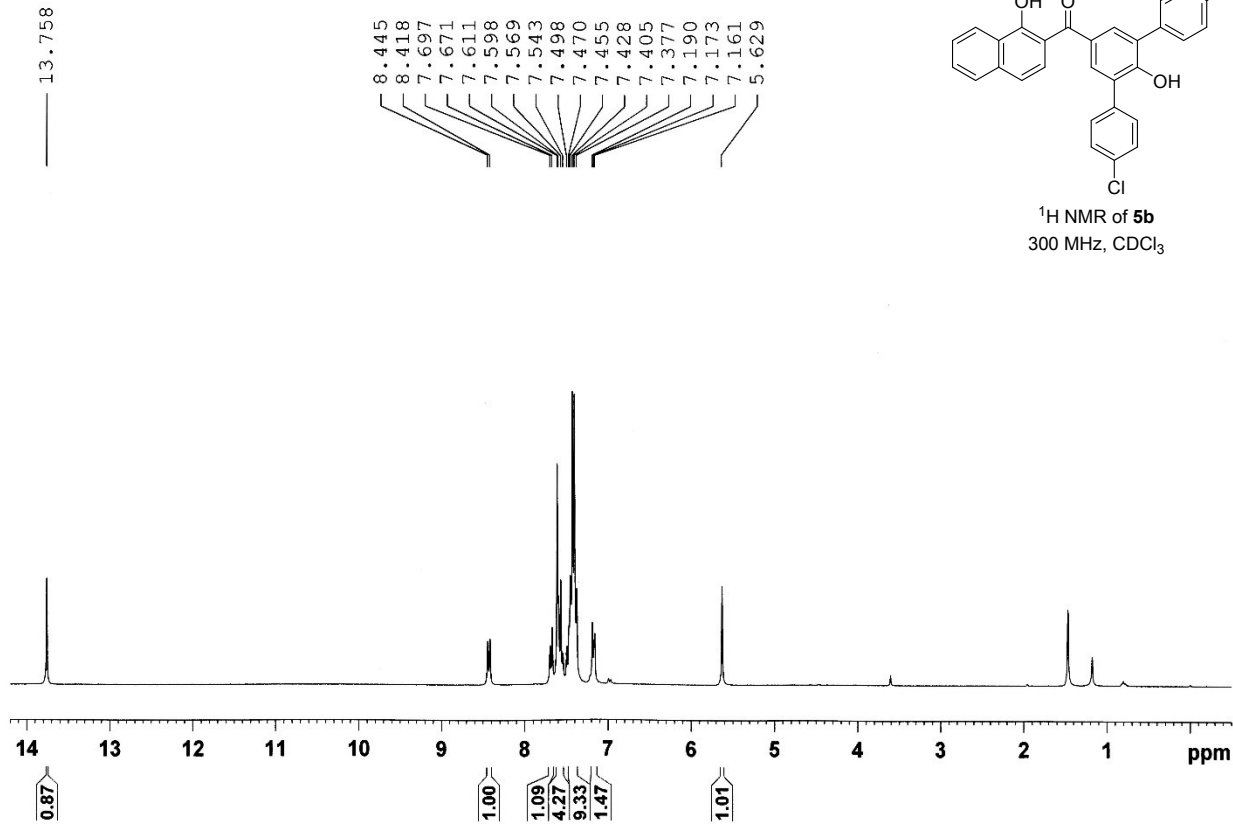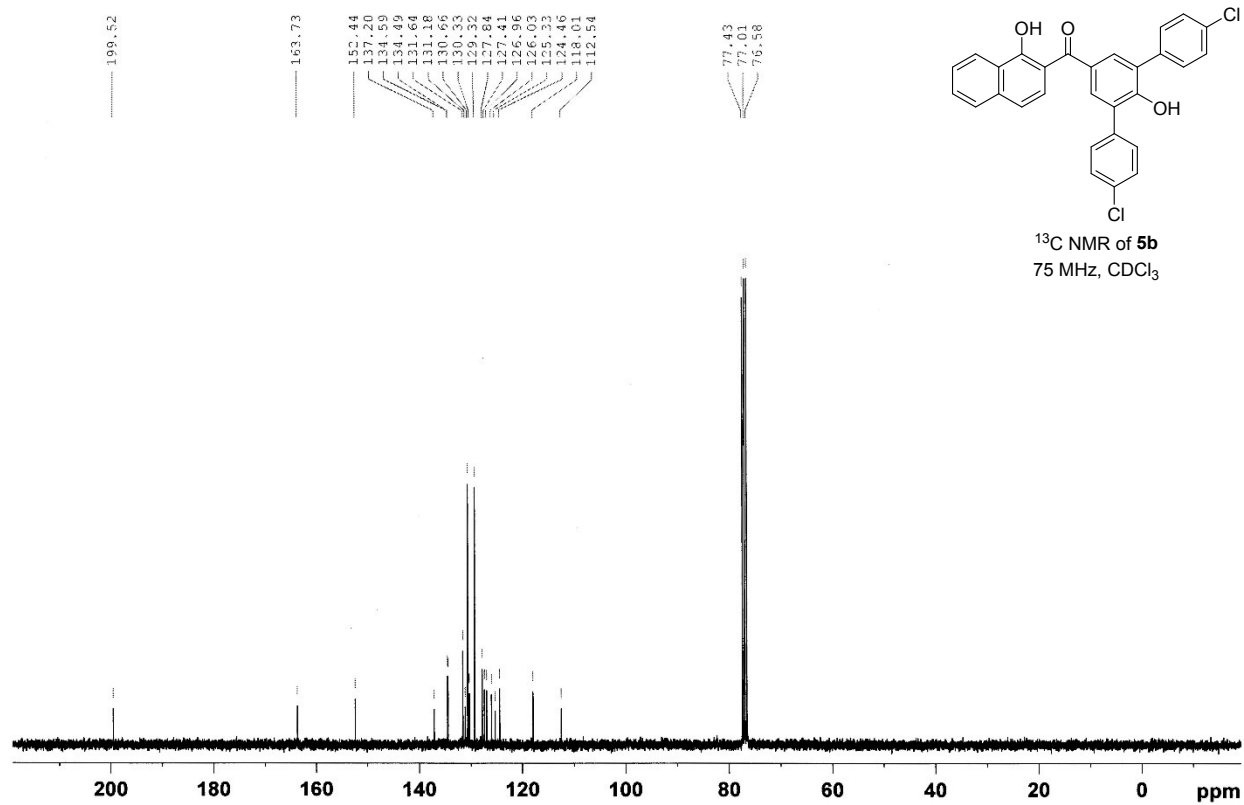

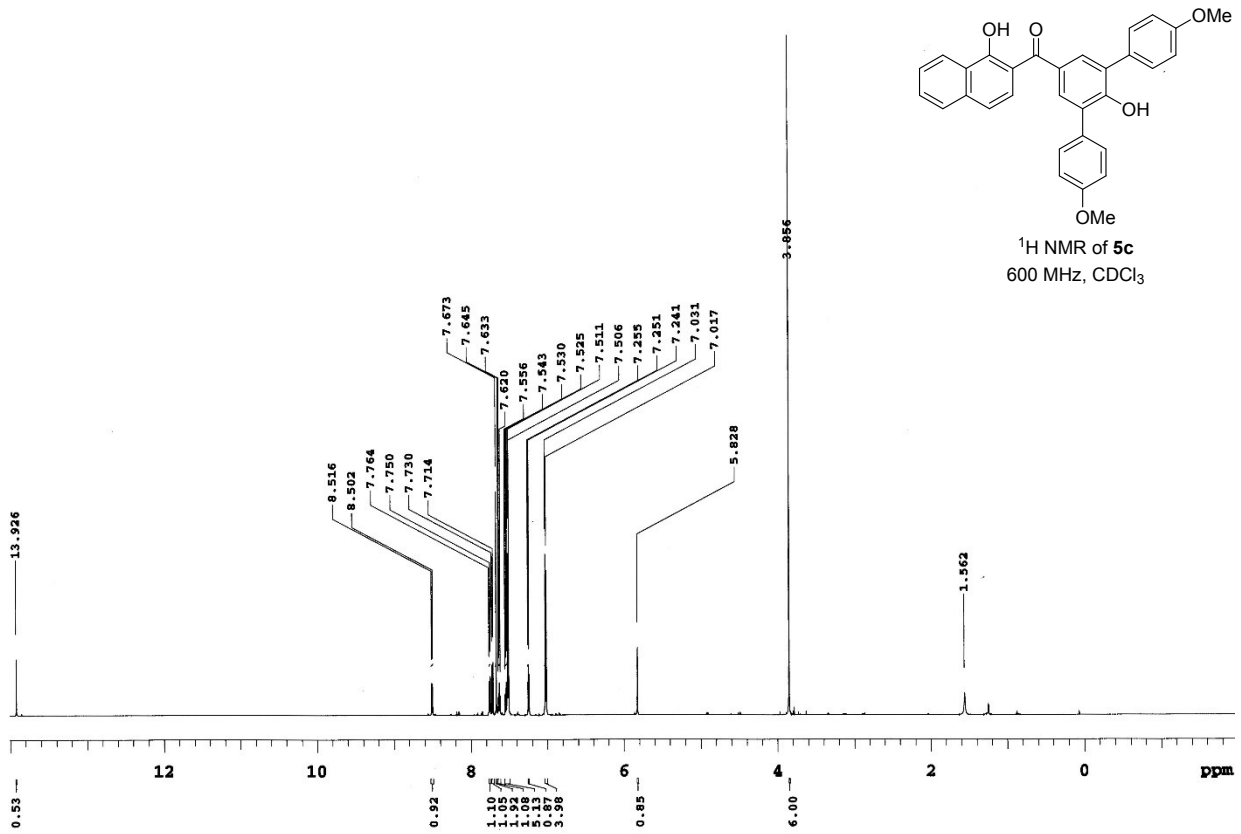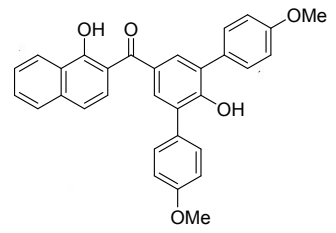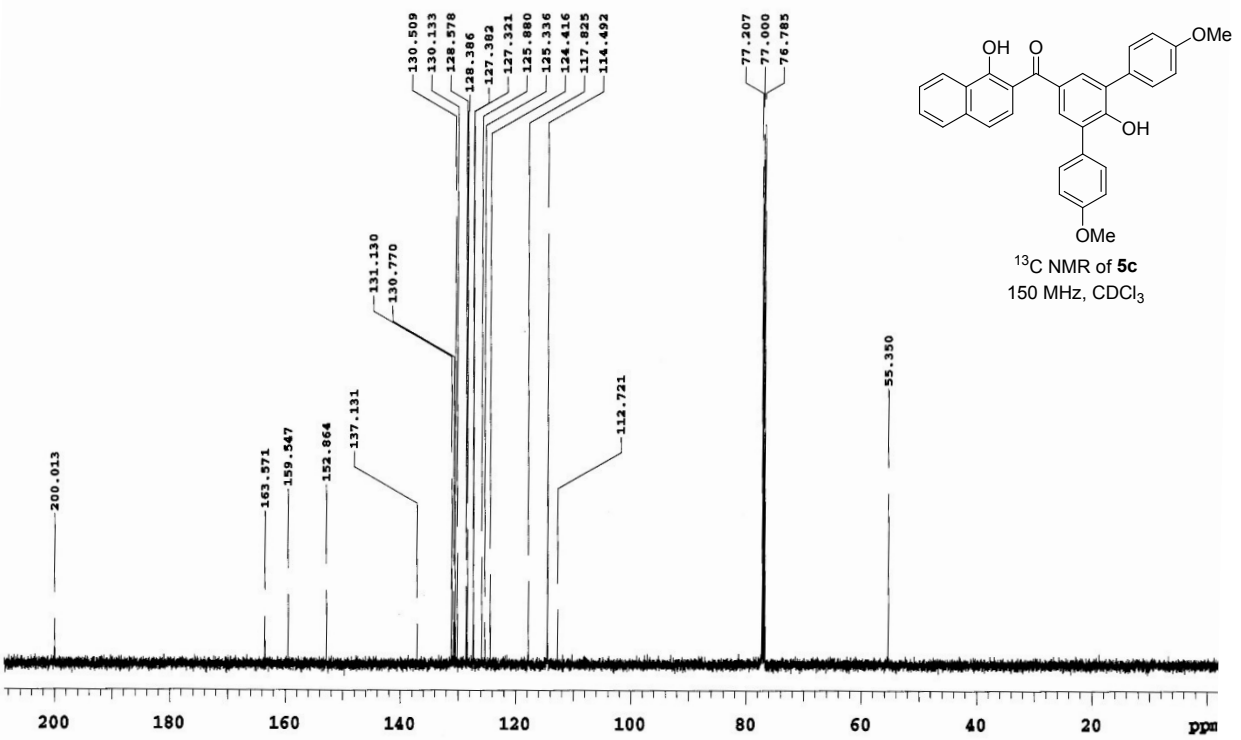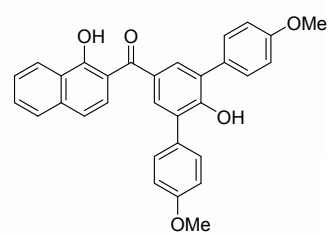

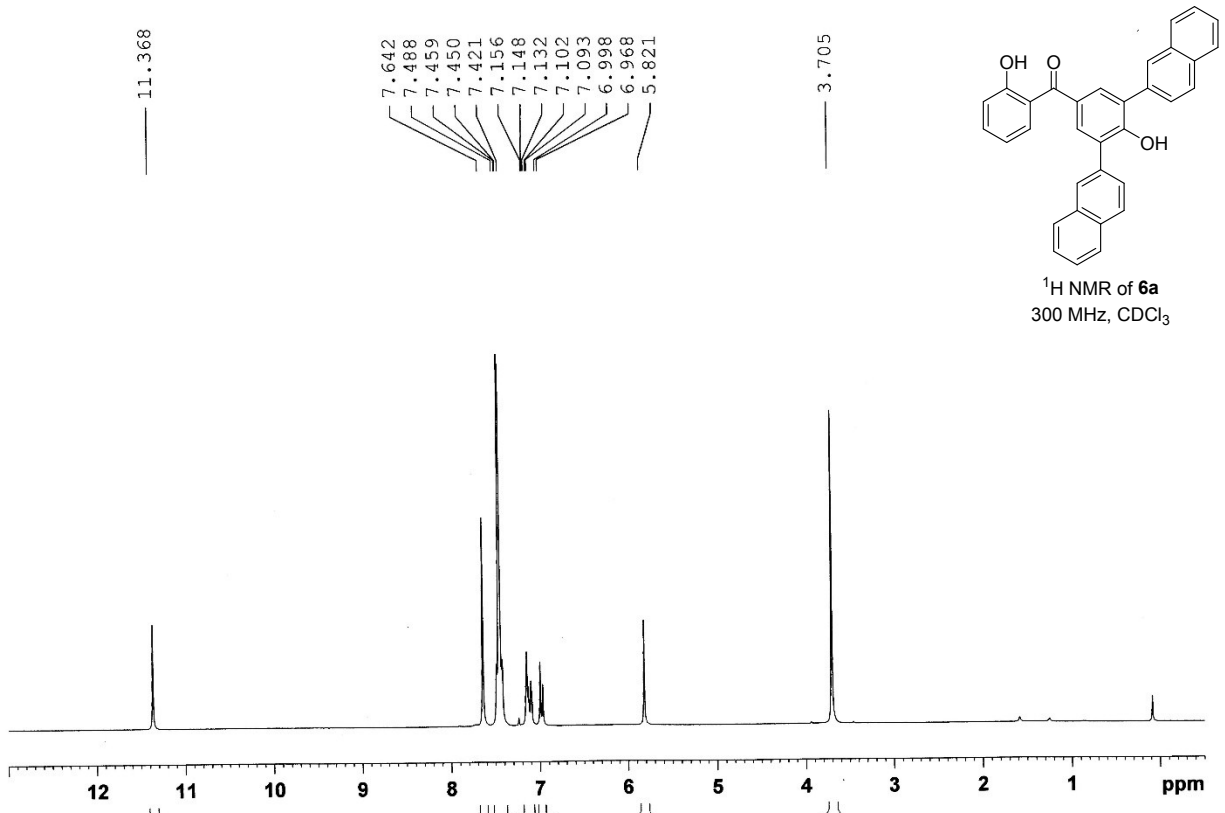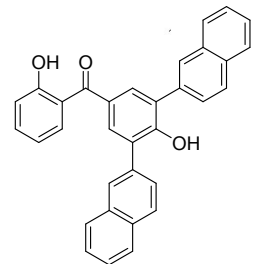

<sup>1</sup>H NMR of 6a  
300 MHz, CDCl<sub>3</sub>

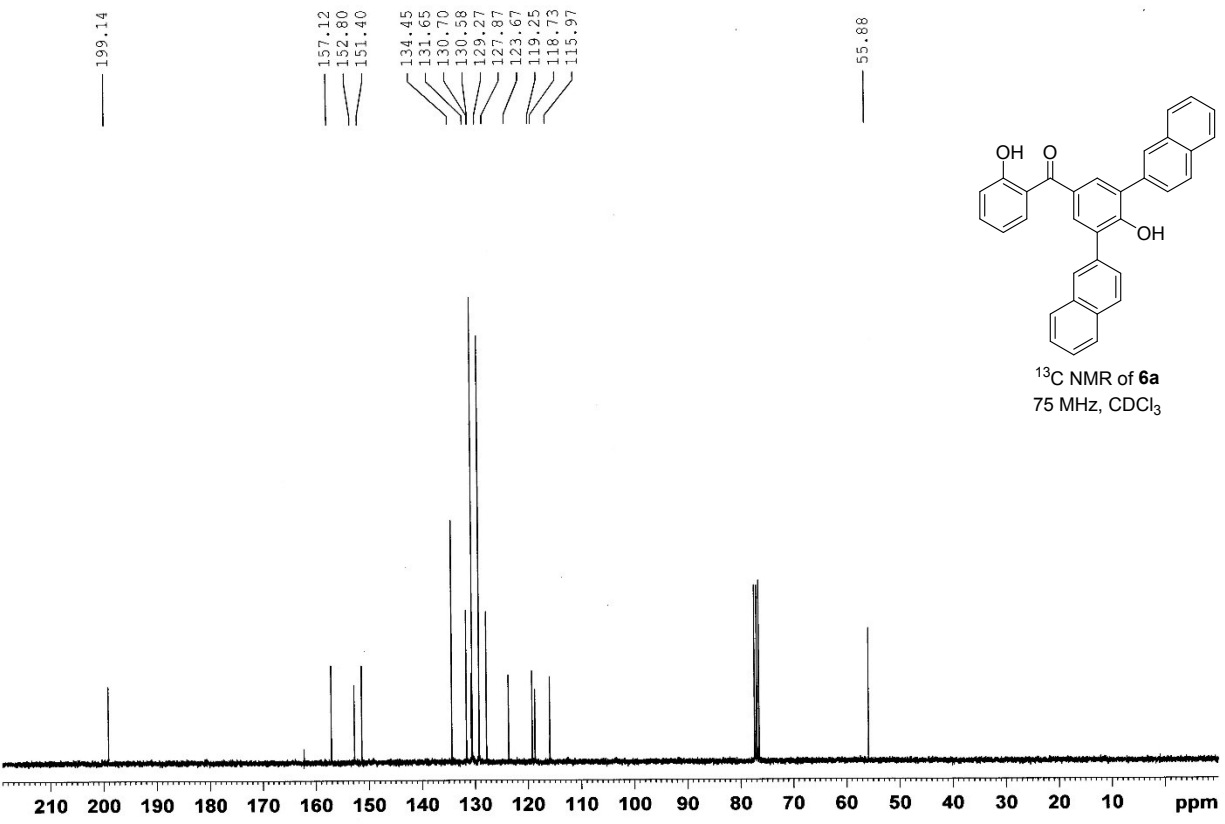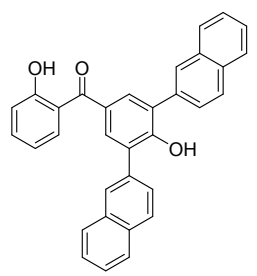

<sup>13</sup>C NMR of 6a  
75 MHz, CDCl<sub>3</sub>

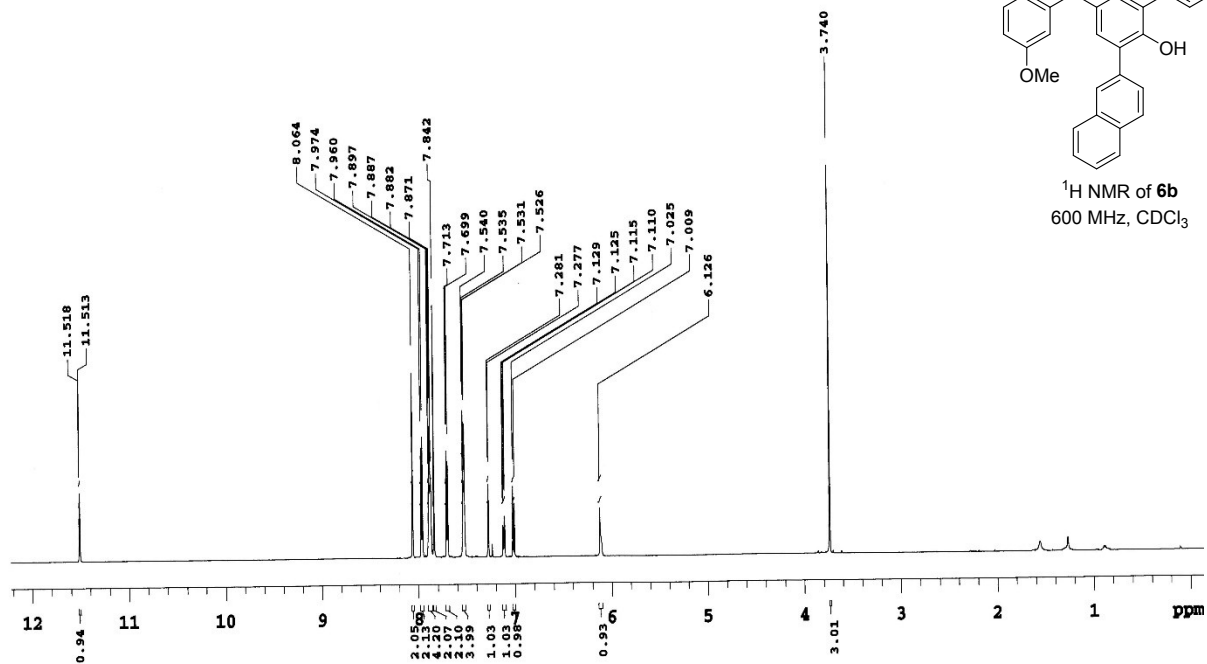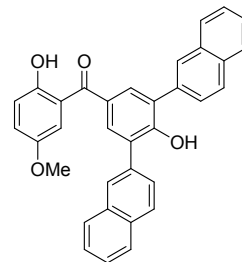

**<sup>1</sup>H NMR of 6b**  
600 MHz, CDCl<sub>3</sub>

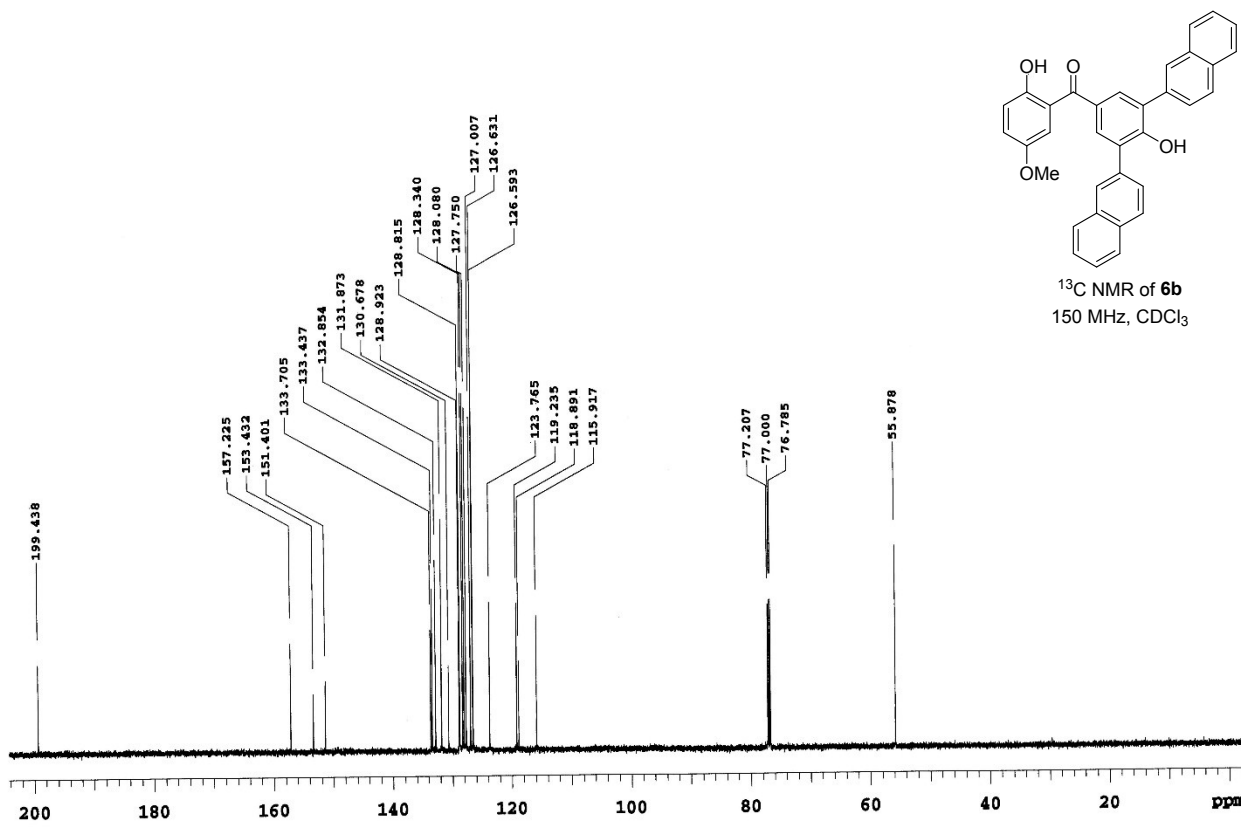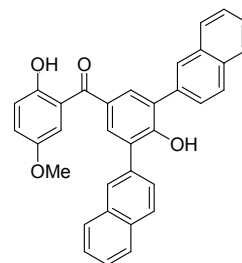

**<sup>13</sup>C NMR of 6b**  
150 MHz, CDCl<sub>3</sub>

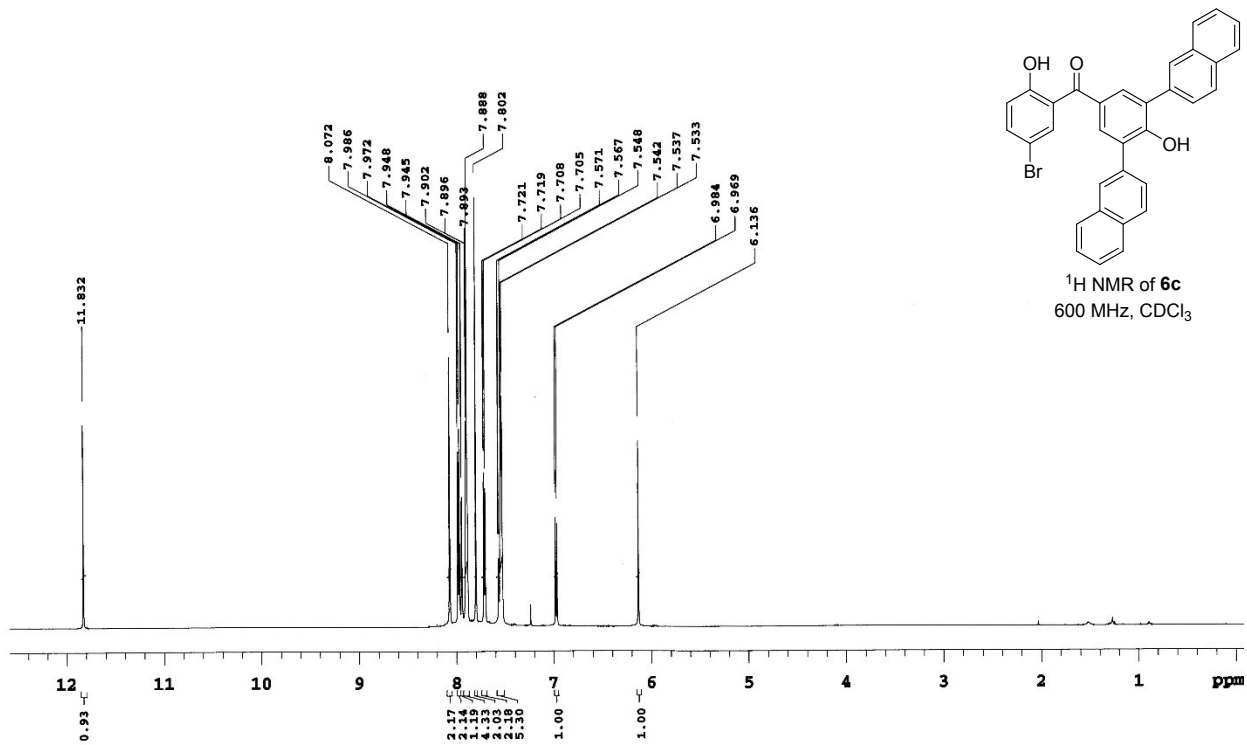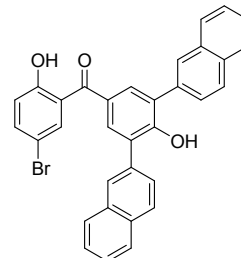

**<sup>1</sup>H NMR of 6c**  
600 MHz, CDCl<sub>3</sub>

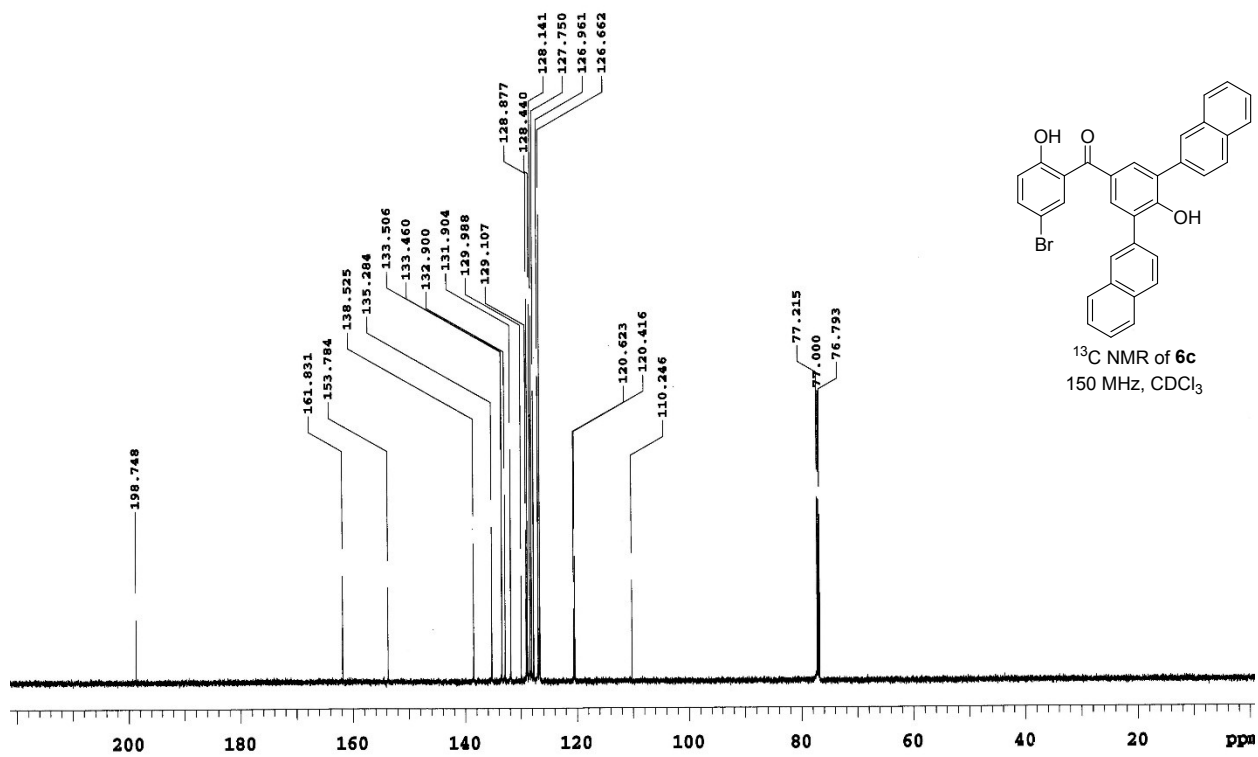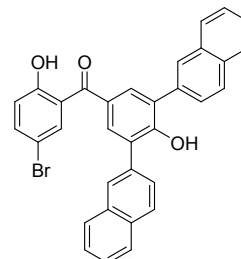

**<sup>13</sup>C NMR of 6c**  
150 MHz, CDCl<sub>3</sub>





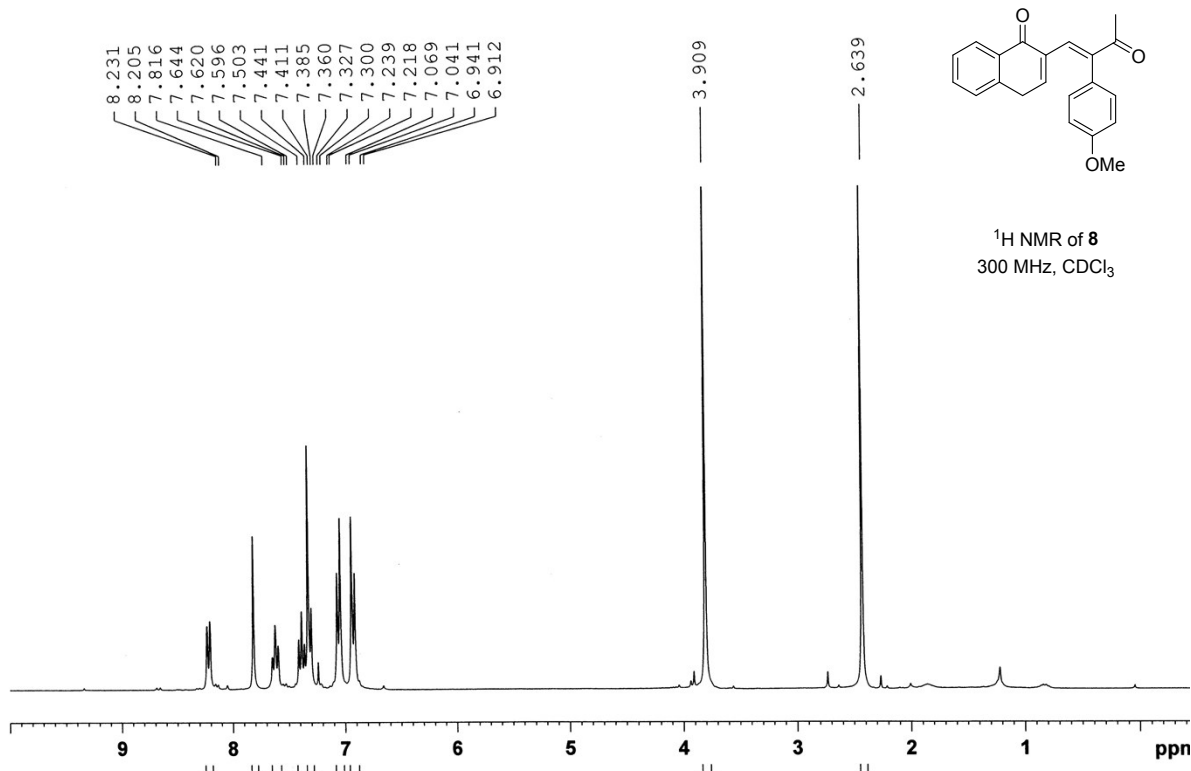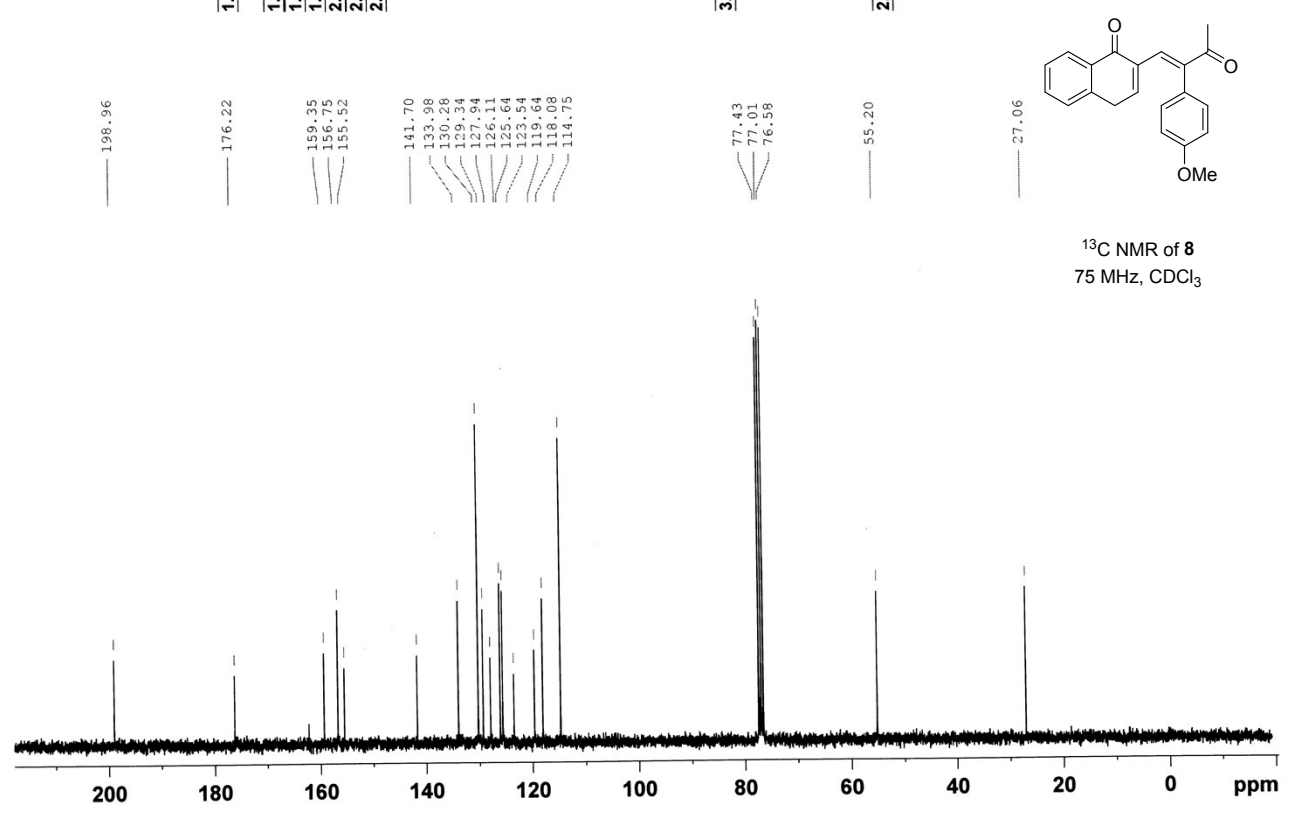

### Procedure for the UV absorption experiment

Absorbance spectra of the tested compounds were recorded at room temperature (298 K) using UV/Vis spectrophotometer (Optizen UV-3200). The samples were prepared in an ethanol solvent (Sigma-Aldrich,  $\geq 99.8\%$  pure) at a concentration of 50  $\mu\text{M}$ . The data were corrected for solvent background by the instrument's calibration using the ethanol as a blank. The absorption spectra of samples in solution were obtained in the range of 220-600 nm at 1 nm interval in 3 determination using three trial samples. The critical wavelength ( $\lambda_c$ ) and UVA/UVB ratio were calculated using equation 1 and 2, respectively, as shown below:

$$\int_{290}^{\lambda_c} A(\lambda)d\lambda = 0.9 \int_{290}^{400} A(\lambda)d\lambda \quad (1)$$
$$\frac{\int_{320}^{400} A(\lambda)d\lambda / \int_{320}^{400} d\lambda}{\int_{290}^{320} A(\lambda)d\lambda / \int_{290}^{320} d\lambda} \quad (2)$$

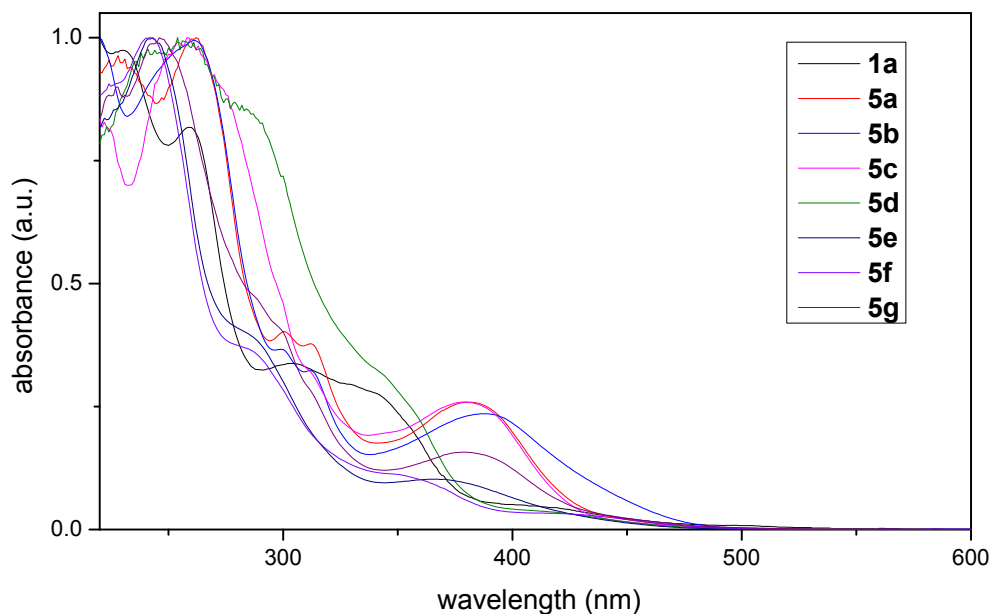

**Fig. S1** Normalized UV absorbance spectra of compounds **1a**, **5a-5g** (220-600 nm)

**X-Ray crystallographic structure and data of compound 3c:** Empirical Formula-  $C_{27}H_{22}O_3$ ,  $M = 394.45$ , Monoclinic, Space group  $P_{bca}$ ,  $a = 12.4924(9) \text{ \AA}$ ,  $b = 8.6494(5) \text{ \AA}$ ,  $c = 20.0211(14) \text{ \AA}$ ,  $V = 2086.5(2) \text{ \AA}^3$ ,  $Z = 4$ ,  $T = 223(2) \text{ K}$ ,  $\rho_{\text{calcd}} = 1.256 \text{ Mg/m}^3$ ,  $2\theta_{\text{max.}} = 26.07^\circ$ , Refinement of 274 parameters on 4126 independent reflections out of 58124 collected reflections ( $R_{\text{int}} = 0.1692$ ) led to  $R_1 = 0.0487$  [ $I > 2\sigma(I)$ ],  $wR_2 = 0.1181$  (all data) and  $S = 1.029$  with the largest difference peak and hole of 0.218 and -0.211  $e. \text{ \AA}^{-3}$  respectively. The crystal structure has been deposited at the Cambridge Crystallographic Data Centre (CCDC 1484692). The data can be obtained free of charge via the Internet at [www.ccdc.cam.ac.uk/data\\_request/cif](http://www.ccdc.cam.ac.uk/data_request/cif).

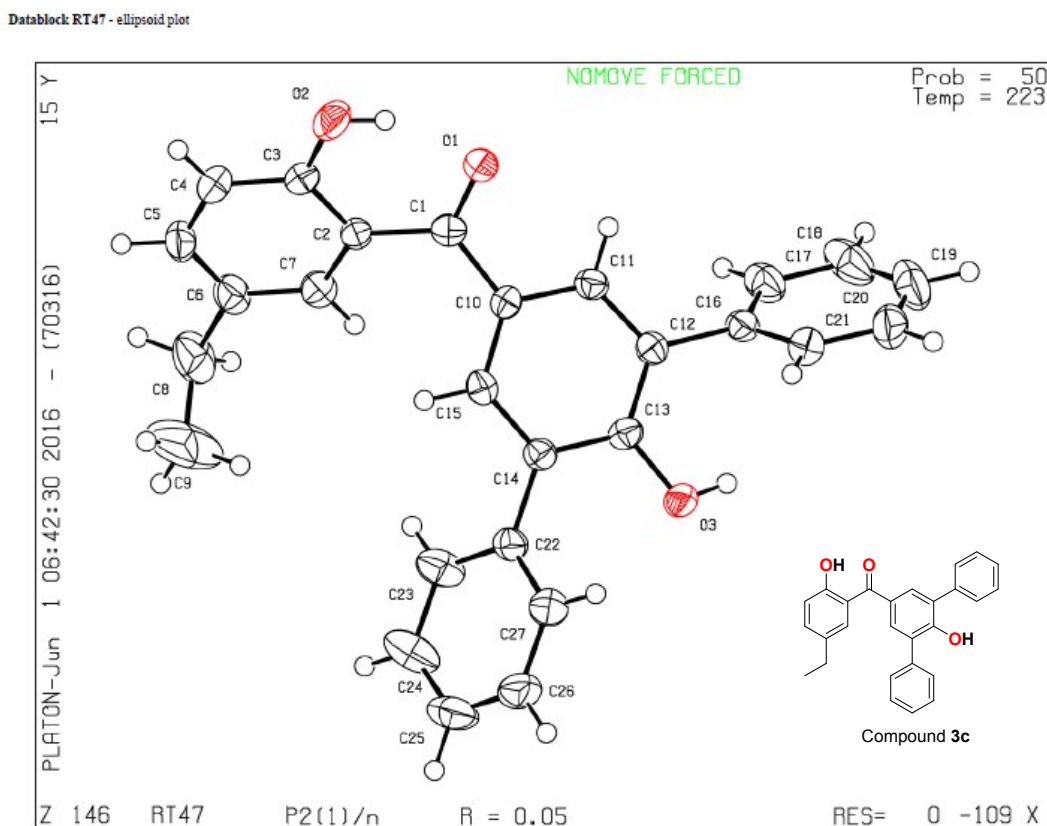

**Fig. S2** X-Ray crystallographic structure of compound 3c.

**Table 1.** Crystal data and structure refinement for **3c**.

|                                   |                                                |                  |
|-----------------------------------|------------------------------------------------|------------------|
| Identification code               | RT47                                           |                  |
| Empirical formula                 | C <sub>27</sub> H <sub>22</sub> O <sub>3</sub> |                  |
| Formula weight                    | 394.45                                         |                  |
| Temperature                       | 223(2) K                                       |                  |
| Wavelength                        | 0.71073 Å                                      |                  |
| Crystal system                    | Monoclinic                                     |                  |
| Space group                       | P2(1)/n                                        |                  |
| Unit cell dimensions              | a = 12.4924(9) Å                               | α = 90°.         |
|                                   | b = 8.6494(5) Å                                | β = 105.311(4)°. |
|                                   | c = 20.0211(14) Å                              | γ = 90°.         |
| Volume                            | 2086.5(2) Å <sup>3</sup>                       |                  |
| Z                                 | 4                                              |                  |
| Density (calculated)              | 1.256 Mg/m <sup>3</sup>                        |                  |
| Absorption coefficient            | 0.081 mm <sup>-1</sup>                         |                  |
| F(000)                            | 832                                            |                  |
| Crystal size                      | 0.30 x 0.22 x 0.20 mm <sup>3</sup>             |                  |
| Theta range for data collection   | 2.11 to 26.07°.                                |                  |
| Index ranges                      | -15 ≤ h ≤ 15, -10 ≤ k ≤ 10, -24 ≤ l ≤ 24       |                  |
| Reflections collected             | 58124                                          |                  |
| Independent reflections           | 4126 [R(int) = 0.1692]                         |                  |
| Completeness to theta = 26.07°    | 99.7 %                                         |                  |
| Absorption correction             | Semi-empirical from equivalents                |                  |
| Max. and min. transmission        | 0.9840 and 0.9762                              |                  |
| Refinement method                 | Full-matrix least-squares on F <sup>2</sup>    |                  |
| Data / restraints / parameters    | 4126 / 0 / 274                                 |                  |
| Goodness-of-fit on F <sup>2</sup> | 1.029                                          |                  |
| Final R indices [I > 2σ(I)]       | R1 = 0.0487, wR2 = 0.0968                      |                  |
| R indices (all data)              | R1 = 0.1085, wR2 = 0.1181                      |                  |
| Largest diff. peak and hole       | 0.218 and -0.211 e.Å <sup>-3</sup>             |                  |

**Table 2.** Atomic coordinates ( $\times 10^4$ ) and equivalent isotropic displacement parameters ( $\text{\AA}^2 \times 10^3$ ) for **3c**.  $U(\text{eq})$  is defined as one third of the trace of the orthogonalized  $U^{ij}$  tensor.

|       | x       | y       | z       | $U(\text{eq})$ |
|-------|---------|---------|---------|----------------|
| C(1)  | 4707(2) | 6601(2) | 4064(1) | 27(1)          |
| O(1)  | 4123(1) | 7646(2) | 4211(1) | 34(1)          |
| C(2)  | 5818(2) | 6310(2) | 4525(1) | 27(1)          |
| C(3)  | 6344(2) | 7461(2) | 4993(1) | 34(1)          |
| C(4)  | 7408(2) | 7212(3) | 5406(1) | 44(1)          |
| C(5)  | 7927(2) | 5822(3) | 5381(1) | 45(1)          |
| C(6)  | 7421(2) | 4631(3) | 4945(1) | 39(1)          |
| C(7)  | 6374(2) | 4907(2) | 4526(1) | 33(1)          |
| O(2)  | 5861(1) | 8833(2) | 5051(1) | 50(1)          |
| C(8)  | 8010(2) | 3125(3) | 4911(1) | 60(1)          |
| C(9)  | 8572(3) | 3109(4) | 4337(2) | 111(1)         |
| C(10) | 4267(2) | 5743(2) | 3409(1) | 27(1)          |
| C(11) | 3123(2) | 5625(2) | 3151(1) | 28(1)          |
| C(12) | 2637(2) | 5044(2) | 2498(1) | 28(1)          |
| C(13) | 3331(2) | 4548(2) | 2089(1) | 28(1)          |
| C(14) | 4488(2) | 4617(2) | 2339(1) | 27(1)          |
| C(15) | 4935(2) | 5221(2) | 2998(1) | 28(1)          |
| C(16) | 1408(2) | 4954(2) | 2243(1) | 31(1)          |
| C(17) | 801(2)  | 4061(3) | 2585(1) | 43(1)          |
| C(18) | -349(2) | 3987(3) | 2342(2) | 60(1)          |
| C(19) | -880(2) | 4792(3) | 1757(2) | 63(1)          |
| C(20) | -291(2) | 5686(3) | 1419(1) | 54(1)          |
| C(21) | 847(2)  | 5782(3) | 1661(1) | 42(1)          |
| O(3)  | 2925(1) | 3970(2) | 1443(1) | 37(1)          |
| C(22) | 5229(2) | 3979(2) | 1936(1) | 30(1)          |
| C(23) | 6067(2) | 2962(3) | 2260(1) | 47(1)          |
| C(24) | 6756(2) | 2283(3) | 1906(2) | 61(1)          |
| C(25) | 6618(2) | 2617(3) | 1217(2) | 55(1)          |
| C(26) | 5823(2) | 3642(3) | 896(1)  | 55(1)          |
| C(27) | 5129(2) | 4310(3) | 1249(1) | 46(1)          |

**Table 3.** Bond lengths [Å] and angles [°] for **3c**.

---

|             |          |
|-------------|----------|
| C(1)-O(1)#1 | 1.245(2) |
| C(1)-O(1)   | 1.245(2) |
| C(1)-C(2)   | 1.471(3) |
| C(1)-C(10)  | 1.480(3) |
| O(1)-O(1)#1 | 0.000(4) |
| C(2)-C(7)   | 1.397(3) |
| C(2)-C(3)   | 1.406(3) |
| C(3)-O(2)   | 1.350(2) |
| C(3)-C(4)   | 1.384(3) |
| C(4)-C(5)   | 1.374(3) |
| C(4)-H(4)   | 0.9400   |
| C(5)-C(6)   | 1.389(3) |
| C(5)-H(5)   | 0.9400   |
| C(6)-C(7)   | 1.376(3) |
| C(6)-C(8)   | 1.507(3) |
| C(7)-H(7)   | 0.9400   |
| O(2)-H(2)   | 0.8300   |
| C(8)-C(9)   | 1.496(4) |
| C(8)-H(8A)  | 0.9800   |
| C(8)-H(8B)  | 0.9800   |
| C(9)-H(9A)  | 0.9700   |
| C(9)-H(9B)  | 0.9700   |
| C(9)-H(9C)  | 0.9700   |
| C(10)-C(11) | 1.389(3) |
| C(10)-C(15) | 1.393(3) |
| C(11)-C(12) | 1.382(3) |
| C(11)-H(11) | 0.9400   |
| C(12)-C(13) | 1.407(3) |
| C(12)-C(16) | 1.486(3) |
| C(13)-O(3)  | 1.356(2) |
| C(13)-C(14) | 1.401(3) |
| C(14)-C(15) | 1.391(3) |
| C(14)-C(22) | 1.485(3) |
| C(15)-H(15) | 0.9400   |

|                   |            |
|-------------------|------------|
| C(16)-C(17)       | 1.385(3)   |
| C(16)-C(21)       | 1.389(3)   |
| C(17)-C(18)       | 1.391(3)   |
| C(17)-H(17)       | 0.9400     |
| C(18)-C(19)       | 1.374(4)   |
| C(18)-H(18)       | 0.9400     |
| C(19)-C(20)       | 1.365(4)   |
| C(19)-H(19)       | 0.9400     |
| C(20)-C(21)       | 1.378(3)   |
| C(20)-H(20)       | 0.9400     |
| C(21)-H(21)       | 0.9400     |
| O(3)-H(3)         | 0.8300     |
| C(22)-C(27)       | 1.379(3)   |
| C(22)-C(23)       | 1.390(3)   |
| C(23)-C(24)       | 1.381(3)   |
| C(23)-H(23)       | 0.9400     |
| C(24)-C(25)       | 1.375(4)   |
| C(24)-H(24)       | 0.9400     |
| C(25)-C(26)       | 1.360(4)   |
| C(25)-H(25)       | 0.9400     |
| C(26)-C(27)       | 1.382(3)   |
| C(26)-H(26)       | 0.9400     |
| C(27)-H(27)       | 0.9400     |
| O(1)#1-C(1)-O(1)  | 0.00(13)   |
| O(1)#1-C(1)-C(2)  | 119.35(17) |
| O(1)-C(1)-C(2)    | 119.35(17) |
| O(1)#1-C(1)-C(10) | 118.03(18) |
| O(1)-C(1)-C(10)   | 118.03(18) |
| C(2)-C(1)-C(10)   | 122.57(18) |
| O(1)#1-O(1)-C(1)  | 0(10)      |
| C(7)-C(2)-C(3)    | 117.99(18) |
| C(7)-C(2)-C(1)    | 122.38(18) |
| C(3)-C(2)-C(1)    | 119.61(18) |
| O(2)-C(3)-C(4)    | 117.75(19) |
| O(2)-C(3)-C(2)    | 122.64(18) |



|                   |            |
|-------------------|------------|
| C(4)-C(3)-C(2)    | 119.6(2)   |
| C(5)-C(4)-C(3)    | 120.2(2)   |
| C(5)-C(4)-H(4)    | 119.9      |
| C(3)-C(4)-H(4)    | 119.9      |
| C(4)-C(5)-C(6)    | 122.0(2)   |
| C(4)-C(5)-H(5)    | 119.0      |
| C(6)-C(5)-H(5)    | 119.0      |
| C(7)-C(6)-C(5)    | 117.2(2)   |
| C(7)-C(6)-C(8)    | 121.3(2)   |
| C(5)-C(6)-C(8)    | 121.5(2)   |
| C(6)-C(7)-C(2)    | 122.9(2)   |
| C(6)-C(7)-H(7)    | 118.5      |
| C(2)-C(7)-H(7)    | 118.5      |
| C(3)-O(2)-H(2)    | 109.5      |
| C(9)-C(8)-C(6)    | 112.1(2)   |
| C(9)-C(8)-H(8A)   | 109.2      |
| C(6)-C(8)-H(8A)   | 109.2      |
| C(9)-C(8)-H(8B)   | 109.2      |
| C(6)-C(8)-H(8B)   | 109.2      |
| H(8A)-C(8)-H(8B)  | 107.9      |
| C(8)-C(9)-H(9A)   | 109.5      |
| C(8)-C(9)-H(9B)   | 109.5      |
| H(9A)-C(9)-H(9B)  | 109.5      |
| C(8)-C(9)-H(9C)   | 109.5      |
| H(9A)-C(9)-H(9C)  | 109.5      |
| H(9B)-C(9)-H(9C)  | 109.5      |
| C(11)-C(10)-C(15) | 118.36(18) |
| C(11)-C(10)-C(1)  | 118.12(18) |
| C(15)-C(10)-C(1)  | 123.01(18) |
| C(12)-C(11)-C(10) | 121.99(18) |
| C(12)-C(11)-H(11) | 119.0      |
| C(10)-C(11)-H(11) | 119.0      |
| C(11)-C(12)-C(13) | 118.49(18) |
| C(11)-C(12)-C(16) | 120.03(18) |
| C(13)-C(12)-C(16) | 121.48(18) |
| O(3)-C(13)-C(14)  | 116.54(17) |

|                   |            |
|-------------------|------------|
| O(3)-C(13)-C(12)  | 122.43(18) |
| C(14)-C(13)-C(12) | 121.02(18) |
| C(15)-C(14)-C(13) | 118.20(18) |
| C(15)-C(14)-C(22) | 120.18(18) |
| C(13)-C(14)-C(22) | 121.51(17) |
| C(14)-C(15)-C(10) | 121.91(18) |
| C(14)-C(15)-H(15) | 119.0      |
| C(10)-C(15)-H(15) | 119.0      |
| C(17)-C(16)-C(21) | 118.7(2)   |
| C(17)-C(16)-C(12) | 120.67(19) |
| C(21)-C(16)-C(12) | 120.58(19) |
| C(16)-C(17)-C(18) | 120.2(2)   |
| C(16)-C(17)-H(17) | 119.9      |
| C(18)-C(17)-H(17) | 119.9      |
| C(19)-C(18)-C(17) | 119.7(3)   |
| C(19)-C(18)-H(18) | 120.1      |
| C(17)-C(18)-H(18) | 120.1      |
| C(20)-C(19)-C(18) | 120.6(2)   |
| C(20)-C(19)-H(19) | 119.7      |
| C(18)-C(19)-H(19) | 119.7      |
| C(19)-C(20)-C(21) | 120.0(3)   |
| C(19)-C(20)-H(20) | 120.0      |
| C(21)-C(20)-H(20) | 120.0      |
| C(20)-C(21)-C(16) | 120.7(2)   |
| C(20)-C(21)-H(21) | 119.7      |
| C(16)-C(21)-H(21) | 119.7      |
| C(13)-O(3)-H(3)   | 109.5      |
| C(27)-C(22)-C(23) | 117.0(2)   |
| C(27)-C(22)-C(14) | 124.06(19) |
| C(23)-C(22)-C(14) | 118.89(18) |
| C(24)-C(23)-C(22) | 121.7(2)   |
| C(24)-C(23)-H(23) | 119.2      |
| C(22)-C(23)-H(23) | 119.2      |
| C(25)-C(24)-C(23) | 119.7(3)   |
| C(25)-C(24)-H(24) | 120.1      |
| C(23)-C(24)-H(24) | 120.1      |

|                   |          |
|-------------------|----------|
| C(26)-C(25)-C(24) | 119.6(2) |
| C(26)-C(25)-H(25) | 120.2    |
| C(24)-C(25)-H(25) | 120.2    |
| C(25)-C(26)-C(27) | 120.6(2) |
| C(25)-C(26)-H(26) | 119.7    |
| C(27)-C(26)-H(26) | 119.7    |
| C(22)-C(27)-C(26) | 121.3(2) |
| C(22)-C(27)-H(27) | 119.3    |
| C(26)-C(27)-H(27) | 119.3    |

---

Symmetry transformations used to generate equivalent atoms:

#1 x,y,z

**Table 4.** Anisotropic displacement parameters ( $\text{\AA}^2 \times 10^3$ ) for **3c**. The anisotropic displacement factor exponent takes the form:  $-2\pi^2 [ h^2 a^{*2} U^{11} + \dots + 2 h k a^* b^* U^{12} ]$

|       | U11    | U22   | U33    | U23    | U13   | U12    |
|-------|--------|-------|--------|--------|-------|--------|
| C(1)  | 31(1)  | 26(1) | 27(1)  | 2(1)   | 11(1) | -1(1)  |
| O(1)  | 32(1)  | 38(1) | 31(1)  | -5(1)  | 6(1)  | 7(1)   |
| C(2)  | 25(1)  | 35(1) | 21(1)  | 4(1)   | 7(1)  | 2(1)   |
| C(3)  | 34(1)  | 44(1) | 23(1)  | -3(1)  | 7(1)  | 4(1)   |
| C(4)  | 36(1)  | 62(2) | 30(1)  | -10(1) | 2(1)  | -1(1)  |
| C(5)  | 26(1)  | 74(2) | 31(1)  | 5(1)   | 3(1)  | 6(1)   |
| C(6)  | 35(1)  | 48(1) | 34(1)  | 13(1)  | 10(1) | 10(1)  |
| C(7)  | 34(1)  | 34(1) | 31(1)  | 5(1)   | 10(1) | 2(1)   |
| O(2)  | 49(1)  | 51(1) | 41(1)  | -21(1) | -6(1) | 12(1)  |
| C(8)  | 50(2)  | 57(2) | 68(2)  | 14(1)  | 8(1)  | 22(1)  |
| C(9)  | 138(3) | 97(3) | 119(3) | 17(2)  | 71(3) | 73(3)  |
| C(10) | 27(1)  | 28(1) | 24(1)  | 1(1)   | 4(1)  | 0(1)   |
| C(11) | 29(1)  | 32(1) | 27(1)  | 0(1)   | 11(1) | 2(1)   |
| C(12) | 25(1)  | 30(1) | 29(1)  | 0(1)   | 8(1)  | -2(1)  |
| C(13) | 31(1)  | 29(1) | 25(1)  | -2(1)  | 9(1)  | -5(1)  |
| C(14) | 27(1)  | 29(1) | 27(1)  | 0(1)   | 10(1) | -3(1)  |
| C(15) | 24(1)  | 28(1) | 31(1)  | 3(1)   | 7(1)  | 0(1)   |
| C(16) | 26(1)  | 33(1) | 34(1)  | -10(1) | 9(1)  | -4(1)  |
| C(17) | 35(1)  | 41(1) | 57(2)  | -8(1)  | 18(1) | -5(1)  |
| C(18) | 42(2)  | 47(2) | 101(2) | -19(2) | 36(2) | -11(1) |
| C(19) | 28(2)  | 57(2) | 97(2)  | -33(2) | 5(2)  | 1(1)   |
| C(20) | 38(2)  | 58(2) | 56(2)  | -17(1) | -4(1) | 13(1)  |
| C(21) | 35(1)  | 50(1) | 38(1)  | -7(1)  | 5(1)  | 2(1)   |
| O(3)  | 28(1)  | 54(1) | 31(1)  | -13(1) | 9(1)  | -9(1)  |
| C(22) | 26(1)  | 32(1) | 34(1)  | -6(1)  | 13(1) | -8(1)  |
| C(23) | 52(2)  | 45(1) | 53(2)  | 6(1)   | 30(1) | 7(1)   |
| C(24) | 60(2)  | 50(2) | 86(2)  | 3(2)   | 42(2) | 15(1)  |
| C(25) | 50(2)  | 60(2) | 69(2)  | -27(2) | 38(2) | -13(1) |
| C(26) | 45(2)  | 89(2) | 38(1)  | -15(1) | 22(1) | -11(2) |
| C(27) | 37(1)  | 67(2) | 35(1)  | -3(1)  | 13(1) | -1(1)  |

**Table 5.** Hydrogen coordinates ( $\times 10^4$ ) and isotropic displacement parameters ( $\text{\AA}^2 \times 10^3$ ) for **3c**.

|       | x     | y    | z    | U(eq) |
|-------|-------|------|------|-------|
| H(4)  | 7776  | 7997 | 5704 | 52    |
| H(5)  | 8648  | 5671 | 5668 | 54    |
| H(7)  | 6015  | 4116 | 4228 | 40    |
| H(2)  | 5215  | 8833 | 4800 | 75    |
| H(8A) | 8565  | 2952 | 5353 | 71    |
| H(8B) | 7472  | 2276 | 4842 | 71    |
| H(9A) | 8025  | 3275 | 3899 | 166   |
| H(9B) | 8930  | 2117 | 4329 | 166   |
| H(9C) | 9124  | 3925 | 4412 | 166   |
| H(11) | 2665  | 5951 | 3429 | 34    |
| H(15) | 5710  | 5279 | 3170 | 33    |
| H(17) | 1166  | 3503 | 2983 | 52    |
| H(18) | -762  | 3388 | 2578 | 72    |
| H(19) | -1655 | 4728 | 1589 | 75    |
| H(20) | -662  | 6237 | 1020 | 64    |
| H(21) | 1247  | 6414 | 1431 | 50    |
| H(3)  | 2254  | 3777 | 1376 | 56    |
| H(23) | 6168  | 2730 | 2731 | 56    |
| H(24) | 7315  | 1596 | 2135 | 73    |
| H(25) | 7072  | 2141 | 970  | 66    |
| H(26) | 5745  | 3898 | 429  | 66    |
| H(27) | 4578  | 5005 | 1015 | 55    |

**Table 6.** Torsion angles [°] for **3c**.

---

|                         |             |
|-------------------------|-------------|
| C(2)-C(1)-O(1)-O(1)#1   | 0.0(2)      |
| C(10)-C(1)-O(1)-O(1)#1  | 0.00(17)    |
| O(1)#1-C(1)-C(2)-C(7)   | 159.33(18)  |
| O(1)-C(1)-C(2)-C(7)     | 159.33(18)  |
| C(10)-C(1)-C(2)-C(7)    | -23.4(3)    |
| O(1)#1-C(1)-C(2)-C(3)   | -19.4(3)    |
| O(1)-C(1)-C(2)-C(3)     | -19.4(3)    |
| C(10)-C(1)-C(2)-C(3)    | 157.93(18)  |
| C(7)-C(2)-C(3)-O(2)     | -177.45(19) |
| C(1)-C(2)-C(3)-O(2)     | 1.3(3)      |
| C(7)-C(2)-C(3)-C(4)     | 4.0(3)      |
| C(1)-C(2)-C(3)-C(4)     | -177.25(19) |
| O(2)-C(3)-C(4)-C(5)     | 178.3(2)    |
| C(2)-C(3)-C(4)-C(5)     | -3.1(3)     |
| C(3)-C(4)-C(5)-C(6)     | 0.5(4)      |
| C(4)-C(5)-C(6)-C(7)     | 1.0(3)      |
| C(4)-C(5)-C(6)-C(8)     | 178.6(2)    |
| C(5)-C(6)-C(7)-C(2)     | 0.1(3)      |
| C(8)-C(6)-C(7)-C(2)     | -177.5(2)   |
| C(3)-C(2)-C(7)-C(6)     | -2.6(3)     |
| C(1)-C(2)-C(7)-C(6)     | 178.73(19)  |
| C(7)-C(6)-C(8)-C(9)     | 82.8(3)     |
| C(5)-C(6)-C(8)-C(9)     | -94.7(3)    |
| O(1)#1-C(1)-C(10)-C(11) | -27.5(3)    |
| O(1)-C(1)-C(10)-C(11)   | -27.5(3)    |
| C(2)-C(1)-C(10)-C(11)   | 155.14(18)  |
| O(1)#1-C(1)-C(10)-C(15) | 144.08(19)  |
| O(1)-C(1)-C(10)-C(15)   | 144.08(19)  |
| C(2)-C(1)-C(10)-C(15)   | -33.2(3)    |
| C(15)-C(10)-C(11)-C(12) | -1.5(3)     |
| C(1)-C(10)-C(11)-C(12)  | 170.50(18)  |
| C(10)-C(11)-C(12)-C(13) | 0.6(3)      |
| C(10)-C(11)-C(12)-C(16) | -179.47(18) |
| C(11)-C(12)-C(13)-O(3)  | -179.70(18) |

|                         |             |
|-------------------------|-------------|
| C(16)-C(12)-C(13)-O(3)  | 0.3(3)      |
| C(11)-C(12)-C(13)-C(14) | 0.9(3)      |
| C(16)-C(12)-C(13)-C(14) | -179.06(18) |
| O(3)-C(13)-C(14)-C(15)  | 179.22(17)  |
| C(12)-C(13)-C(14)-C(15) | -1.4(3)     |
| O(3)-C(13)-C(14)-C(22)  | -4.5(3)     |
| C(12)-C(13)-C(14)-C(22) | 174.91(18)  |
| C(13)-C(14)-C(15)-C(10) | 0.4(3)      |
| C(22)-C(14)-C(15)-C(10) | -175.96(17) |
| C(11)-C(10)-C(15)-C(14) | 1.0(3)      |
| C(1)-C(10)-C(15)-C(14)  | -170.56(18) |
| C(11)-C(12)-C(16)-C(17) | -61.1(3)    |
| C(13)-C(12)-C(16)-C(17) | 118.8(2)    |
| C(11)-C(12)-C(16)-C(21) | 118.0(2)    |
| C(13)-C(12)-C(16)-C(21) | -62.1(3)    |
| C(21)-C(16)-C(17)-C(18) | 0.8(3)      |
| C(12)-C(16)-C(17)-C(18) | 179.9(2)    |
| C(16)-C(17)-C(18)-C(19) | 0.6(3)      |
| C(17)-C(18)-C(19)-C(20) | -1.1(4)     |
| C(18)-C(19)-C(20)-C(21) | 0.3(4)      |
| C(19)-C(20)-C(21)-C(16) | 1.1(3)      |
| C(17)-C(16)-C(21)-C(20) | -1.6(3)     |
| C(12)-C(16)-C(21)-C(20) | 179.3(2)    |
| C(15)-C(14)-C(22)-C(27) | -133.7(2)   |
| C(13)-C(14)-C(22)-C(27) | 50.1(3)     |
| C(15)-C(14)-C(22)-C(23) | 47.5(3)     |
| C(13)-C(14)-C(22)-C(23) | -128.7(2)   |
| C(27)-C(22)-C(23)-C(24) | -1.5(3)     |
| C(14)-C(22)-C(23)-C(24) | 177.5(2)    |
| C(22)-C(23)-C(24)-C(25) | 0.2(4)      |
| C(23)-C(24)-C(25)-C(26) | 1.6(4)      |
| C(24)-C(25)-C(26)-C(27) | -2.1(4)     |
| C(23)-C(22)-C(27)-C(26) | 0.9(3)      |
| C(14)-C(22)-C(27)-C(26) | -178.0(2)   |
| C(25)-C(26)-C(27)-C(22) | 0.9(4)      |

Symmetry transformations used to generate equivalent atoms:

#1 x,y,z

**Table 7.** Hydrogen bonds for **3c** [ $\text{\AA}$  and  $^\circ$ ].

| D-H...A            | d(D-H) | d(H...A) | d(D...A)   | <(DHA) |
|--------------------|--------|----------|------------|--------|
| O(2)-H(2)...O(1)#1 | 0.83   | 1.86     | 2.582(2)   | 144.7  |
| O(3)-H(3)...O(1)#2 | 0.83   | 2.06     | 2.7934(19) | 147.5  |
| O(2)-H(2)...O(2)#3 | 0.83   | 2.49     | 2.918(3)   | 113.4  |

Symmetry transformations used to generate equivalent atoms:

#1 x,y,z #2 -x+1/2,y-1/2,-z+1/2 #3 -x+1,-y+2,-z+1
